# Supplementary material for: An Immune‐Related Gene Panel for Preoperative Lymph Node Status Evaluation in Advanced Gastric Cancer
Source: Hindawi journal article supplement (doi:10.1155/2020/8450656), 2020-01-01
Supplement: f1 [file 8450656.f1.pdf]

| gene      | conMean  | treatMean | logFC    | pValue   | fdr      |
|-----------|----------|-----------|----------|----------|----------|
| TTYH3     | 11.82071 | 43.4214   | 1.877089 | 2.03E-10 | 9.51E-09 |
| LINC01231 | 0.099489 | 0.848435  | 3.09219  | 1.49E-10 | 7.84E-09 |
| AKR1C4    | 0.380311 | 1.284628  | 1.756097 | 0.022016 | 0.036531 |
| AC025031  | 0.10032  | 0.336601  | 1.746432 | 9.48E-05 | 0.000332 |
| MYOC      | 45.8385  | 1.727174  | -4.73007 | 1.74E-11 | 2.48E-09 |
| AC105052  | 0.233122 | 0.673435  | 1.530453 | 5.87E-07 | 4.67E-06 |
| SLC39A10  | 1.255696 | 5.185128  | 2.045893 | 1.27E-13 | 1.20E-09 |
| MIR196A1  | 0.378397 | 1.949539  | 2.365162 | 1.47E-05 | 6.90E-05 |
| AL356740  | 0.06107  | 0.323851  | 2.406789 | 0.000132 | 0.000441 |
| NDRG4     | 1.610113 | 0.546514  | -1.55883 | 0.000211 | 0.000658 |
| DNASE2B   | 0.062035 | 0.235103  | 1.922144 | 0.002779 | 0.006094 |
| SPC25     | 1.935405 | 5.48544   | 1.502972 | 9.05E-09 | 1.64E-07 |
| CENPF     | 1.564397 | 8.622276  | 2.462462 | 2.41E-11 | 2.88E-09 |
| ATP4A     | 136.2253 | 6.402048  | -4.41132 | 0.00048  | 0.001335 |
| TMEM105   | 0.086409 | 0.253763  | 1.554236 | 0.000767 | 0.002    |
| GPM6A     | 1.205505 | 0.188718  | -2.67533 | 4.99E-07 | 4.10E-06 |
| IGKV2D-3  | 29.15886 | 2.540701  | -3.52064 | 0.024282 | 0.039806 |
| LINC01591 | 0.103488 | 0.481713  | 2.218705 | 0.000854 | 0.0022   |
| AC107081  | 0.172553 | 0.493861  | 1.517062 | 5.75E-08 | 7.12E-07 |
| DGKG      | 1.832149 | 0.54557   | -1.7477  | 2.32E-05 | 0.000101 |
| ASCL2     | 4.774954 | 24.6662   | 2.368977 | 0.000388 | 0.00111  |
| RBFOX3    | 0.813711 | 0.275177  | -1.56415 | 0.002386 | 0.005336 |
| FAR2P4    | 0.01966  | 0.345047  | 4.133476 | 0.000161 | 0.000521 |
| AC020612  | 0.071037 | 0.322548  | 2.182867 | 1.66E-08 | 2.62E-07 |
| C4BPAP2   | 0.040447 | 0.215182  | 2.411444 | 0.001355 | 0.003279 |
| AKR1B10   | 248.1823 | 64.78946  | -1.93757 | 0.000256 | 0.00078  |
| EXO1      | 0.711436 | 3.304245  | 2.215514 | 3.38E-11 | 3.29E-09 |
| PRDM8     | 3.628674 | 1.252628  | -1.53448 | 0.000967 | 0.002449 |
| C5orf34   | 0.456085 | 1.566938  | 1.780572 | 2.88E-11 | 3.06E-09 |
| AL353622  | 0.299483 | 0.867228  | 1.533935 | 8.18E-07 | 6.19E-06 |
| HLA-Z     | 0.05363  | 0.26337   | 2.295983 | 0.000752 | 0.001968 |
| HPDL      | 2.356815 | 9.879886  | 2.067656 | 1.35E-07 | 1.42E-06 |
| RNVU1-6   | 0.156799 | 0.479488  | 1.612579 | 0.000741 | 0.001943 |
| AC016735  | 1.591436 | 4.612754  | 1.535299 | 2.93E-05 | 0.000123 |
| LINC02101 | 1.274662 | 0.293552  | -2.11843 | 2.72E-05 | 0.000116 |
| RNU6-834  | 0.195331 | 0.665802  | 1.769172 | 0.000131 | 0.00044  |
| AC124944  | 0.146562 | 0.568871  | 1.956591 | 5.23E-10 | 1.84E-08 |
| RN7SL683  | 0.100404 | 0.308579  | 1.61982  | 0.001429 | 0.003437 |
| GADD45B   | 52.20142 | 15.20451  | -1.77959 | 6.34E-05 | 0.000236 |
| AL078587  | 0.095061 | 0.527978  | 2.473545 | 6.55E-08 | 7.91E-07 |
| AC008429  | 0.099832 | 0.301778  | 1.595911 | 0.00064  | 0.001709 |
| FGFR4     | 4.578763 | 17.78795  | 1.957871 | 6.52E-08 | 7.88E-07 |
| OLR1      | 0.531661 | 3.217443  | 2.597335 | 1.97E-10 | 9.38E-09 |
| AP003170  | 0.079699 | 0.24165   | 1.600283 | 6.64E-05 | 0.000245 |
| LINC00101 | 0.5398   | 1.811861  | 1.746974 | 8.67E-08 | 9.96E-07 |
| CSTA      | 482.9438 | 16.269    | -4.89166 | 0.014097 | 0.024802 |
| HOXA4     | 5.769164 | 1.98734   | -1.53752 | 8.23E-05 | 0.000294 |
| ONECUT2   | 1.491513 | 5.4766    | 1.876504 | 1.55E-07 | 1.59E-06 |
| LIPF      | 3584     | 258.2714  | -3.79461 | 0.002214 | 0.005008 |
| AP006748  | 0.03933  | 0.226188  | 2.52382  | 0.0017   | 0.003982 |
| AC016737  | 0.100911 | 0.546172  | 2.436269 | 5.13E-08 | 6.50E-07 |
| AL512506  | 0.09608  | 0.294521  | 1.616061 | 6.92E-05 | 0.000254 |
| AC083906  | 0.027036 | 0.306293  | 3.501974 | 1.55E-06 | 1.05E-05 |
| AC073365  | 0.001385 | 0.570742  | 8.686725 | 8.75E-05 | 0.000311 |
| GKN1      | 5854.337 | 282.2414  | -4.3745  | 8.18E-05 | 0.000293 |
| AC005391  | 0.128553 | 0.752616  | 2.549552 | 5.83E-08 | 7.20E-07 |
| AC026368  | 0.222282 | 0.953583  | 2.100966 | 5.27E-06 | 2.93E-05 |

|           |          |          |          |          |          |
|-----------|----------|----------|----------|----------|----------|
| BPIFA1    | 0.014046 | 1.605702 | 6.836913 | 0.009532 | 0.017703 |
| RNU6-31C  | 0.07583  | 0.221784 | 1.548307 | 0.017041 | 0.029239 |
| AC108860  | 0.136238 | 0.387836 | 1.509322 | 0.000203 | 0.000638 |
| SCARA5    | 12.83607 | 1.550858 | -3.04906 | 1.00E-10 | 6.06E-09 |
| FXYD1     | 2.328905 | 0.468188 | -2.31449 | 4.52E-10 | 1.67E-08 |
| AC113346  | 0.020637 | 0.434342 | 4.395538 | 8.23E-07 | 6.22E-06 |
| CCL7      | 0.154037 | 0.754276 | 2.291816 | 1.41E-09 | 3.88E-08 |
| LINC00524 | 0.032837 | 0.364041 | 3.470707 | 0.00013  | 0.000436 |
| NANOGN    | 0.087179 | 0.249427 | 1.516573 | 5.97E-06 | 3.25E-05 |
| PRR5-ARF  | 0.024127 | 0.214074 | 3.14939  | 1.05E-12 | 1.31E-09 |
| AL355987  | 0.122245 | 0.356949 | 1.545941 | 2.83E-08 | 4.02E-07 |
| MIR4435-  | 0.588858 | 2.540783 | 2.109282 | 9.84E-13 | 1.31E-09 |
| AC016027  | 0.074208 | 0.282317 | 1.927677 | 5.53E-06 | 3.06E-05 |
| RNU6-22F  | 0.085008 | 0.24367  | 1.519252 | 0.011221 | 0.020359 |
| HOXC11    | 0.341424 | 2.431687 | 2.832323 | 9.06E-10 | 2.80E-08 |
| IL13RA2   | 0.098766 | 0.874795 | 3.146855 | 1.65E-06 | 1.10E-05 |
| PRR11     | 2.370722 | 8.52244  | 1.84594  | 1.68E-11 | 2.48E-09 |
| SPATA17   | 0.08174  | 0.243712 | 1.576065 | 1.56E-05 | 7.24E-05 |
| AC090192  | 0.03946  | 0.605766 | 3.940309 | 1.14E-05 | 5.59E-05 |
| LINC0101  | 0.081039 | 0.290302 | 1.840866 | 1.90E-06 | 1.24E-05 |
| AL355802  | 0.357278 | 1.192009 | 1.738275 | 4.42E-08 | 5.80E-07 |
| ADH1B     | 18.77555 | 3.97058  | -2.24143 | 1.04E-09 | 3.06E-08 |
| FOXP4-AS  | 1.112404 | 3.265607 | 1.55367  | 5.85E-05 | 0.000221 |
| AL121989  | 0.06681  | 0.290018 | 2.118002 | 3.97E-06 | 2.31E-05 |
| ACRV1     | 0.065287 | 0.226617 | 1.795392 | 6.10E-08 | 7.48E-07 |
| RNF150    | 5.69962  | 1.786476 | -1.67375 | 0.003773 | 0.007945 |
| AC103563  | 1.633228 | 0.149579 | -3.44874 | 3.83E-05 | 0.000155 |
| DPP6      | 1.59466  | 0.196511 | -3.02057 | 6.39E-06 | 3.44E-05 |
| KRT87P    | 0.042603 | 0.262988 | 2.625962 | 5.18E-07 | 4.23E-06 |
| SMC1B     | 0.066453 | 0.348813 | 2.392053 | 0.000347 | 0.00101  |
| P3H4      | 3.46585  | 15.50359 | 2.161321 | 2.73E-10 | 1.16E-08 |
| RIPPLY3   | 0.109823 | 0.704356 | 2.681128 | 0.022428 | 0.037132 |
| FRMD5     | 0.320228 | 1.457333 | 2.18616  | 4.37E-09 | 9.16E-08 |
| AL158166  | 0.186635 | 0.569476 | 1.609416 | 2.89E-07 | 2.62E-06 |
| RNFT2     | 0.305386 | 1.662921 | 2.445014 | 1.74E-12 | 1.40E-09 |
| PGM2L1    | 0.943945 | 3.532166 | 1.903779 | 1.30E-12 | 1.32E-09 |
| ZWILCH    | 1.919299 | 5.707508 | 1.572282 | 2.11E-11 | 2.71E-09 |
| AL022345  | 0.097693 | 0.331122 | 1.761039 | 0.000287 | 0.000857 |
| MIR4768   | 0.318208 | 1.057801 | 1.733027 | 0.005614 | 0.011205 |
| ZNF114    | 0.08958  | 0.401722 | 2.164941 | 0.000338 | 0.000987 |
| CFD       | 187.9966 | 28.80231 | -2.70645 | 2.14E-12 | 1.40E-09 |
| WDR97     | 0.076793 | 0.223345 | 1.540222 | 5.50E-05 | 0.00021  |
| AC019186  | 0.075917 | 0.237383 | 1.644724 | 1.71E-05 | 7.82E-05 |
| DHRS2     | 0.093853 | 2.512334 | 4.742475 | 6.60E-05 | 0.000244 |
| MIR657    | 0.129609 | 0.577711 | 2.15618  | 0.000562 | 0.001529 |
| PTPRO     | 0.231925 | 1.36522  | 2.557405 | 3.29E-05 | 0.000136 |
| SPTBN5    | 0.195781 | 0.577788 | 1.561297 | 0.000115 | 0.000392 |
| PLAC9     | 12.08274 | 3.597502 | -1.74788 | 1.05E-07 | 1.17E-06 |
| RN7SL684  | 0.07056  | 0.246092 | 1.802278 | 4.73E-05 | 0.000185 |
| FAP       | 0.395997 | 2.372595 | 2.582906 | 1.56E-10 | 8.04E-09 |
| RNU6-80F  | 0.039162 | 0.270467 | 2.78794  | 6.76E-05 | 0.000249 |
| MIR5685   | 0.097984 | 0.33886  | 1.790073 | 0.008007 | 0.015229 |
| EIF4EP1   | 0.166218 | 0.516559 | 1.635857 | 6.09E-07 | 4.81E-06 |
| AC092681  | 0.097685 | 0.375238 | 1.941589 | 1.01E-05 | 5.03E-05 |
| AL117382  | 0.479132 | 2.802014 | 2.547968 | 2.87E-07 | 2.61E-06 |
| RHPN1-A   | 0.223621 | 0.791752 | 1.823992 | 1.63E-07 | 1.66E-06 |
| PWAR6     | 1.31952  | 0.381119 | -1.7917  | 9.83E-05 | 0.000342 |
| NTSR1     | 0.316114 | 1.909954 | 2.595022 | 0.027187 | 0.043853 |

|          |          |          |          |          |          |
|----------|----------|----------|----------|----------|----------|
| AL391056 | 0.18893  | 1.39538  | 2.884735 | 5.64E-05 | 0.000214 |
| AC004009 | 0.202654 | 0.802155 | 1.984862 | 0.003865 | 0.008115 |
| AC119403 | 0.159674 | 0.686725 | 2.104603 | 0.000147 | 0.000483 |
| LACTB2-A | 0.059336 | 0.252478 | 2.089189 | 1.10E-09 | 3.20E-08 |
| AC087273 | 0.017327 | 0.229714 | 3.728736 | 8.25E-06 | 4.27E-05 |
| S100B    | 9.369454 | 2.209127 | -2.08449 | 2.64E-08 | 3.81E-07 |
| AC112721 | 0.067705 | 0.25304  | 1.902025 | 4.25E-06 | 2.45E-05 |
| C1QTNF6  | 0.717643 | 2.897721 | 2.01358  | 1.08E-11 | 2.22E-09 |
| PPIAP77  | 0.107727 | 0.3583   | 1.733791 | 2.01E-06 | 1.30E-05 |
| AL031666 | 0.091748 | 0.265242 | 1.531559 | 0.000525 | 0.001443 |
| AC007922 | 0.070065 | 0.215297 | 1.619557 | 0.000551 | 0.001503 |
| AL513185 | 0.077343 | 0.256184 | 1.727843 | 0.00538  | 0.010811 |
| AC008440 | 0.217912 | 0.874478 | 2.004674 | 2.17E-05 | 9.55E-05 |
| RNA5SP4  | 0.138307 | 0.422454 | 1.610921 | 0.001358 | 0.003286 |
| AC243967 | 0.151639 | 0.574265 | 1.921079 | 0.016729 | 0.028778 |
| HTRA4    | 0.064576 | 0.437345 | 2.75971  | 8.54E-10 | 2.69E-08 |
| AL513185 | 0.12768  | 0.462282 | 1.856238 | 0.000603 | 0.001625 |
| RNU6-66  | 0.084355 | 0.359817 | 2.092727 | 0.001287 | 0.003138 |
| PTMAP1   | 0.35186  | 1.547322 | 2.1367   | 9.71E-09 | 1.73E-07 |
| AC105235 | 0.113194 | 0.405852 | 1.84216  | 5.31E-07 | 4.32E-06 |
| LINC0157 | 0.069506 | 0.224841 | 1.693698 | 1.09E-08 | 1.88E-07 |
| DLEU2    | 0.443663 | 1.616004 | 1.864894 | 7.71E-12 | 2.04E-09 |
| CENPE    | 0.776234 | 3.439882 | 2.147794 | 9.27E-11 | 5.91E-09 |
| AL390961 | 0.076075 | 0.256809 | 1.755199 | 1.80E-05 | 8.14E-05 |
| MIR5692C | 0.226885 | 0.687029 | 1.59841  | 0.006317 | 0.012404 |
| AL359075 | 0.19219  | 1.265273 | 2.718842 | 2.28E-07 | 2.16E-06 |
| SNX18P3  | 0.101602 | 0.356998 | 1.812989 | 0.00105  | 0.002631 |
| SNORD99  | 0.688193 | 3.089446 | 2.166463 | 1.31E-08 | 2.19E-07 |
| GPX3     | 97.03653 | 21.41519 | -2.17989 | 1.38E-11 | 2.40E-09 |
| IGLV3-6  | 1.365068 | 0.195238 | -2.80566 | 0.024986 | 0.040757 |
| AC008569 | 0.126271 | 0.404817 | 1.680745 | 5.35E-07 | 4.35E-06 |
| LINC0171 | 0.018284 | 0.337458 | 4.206028 | 3.98E-10 | 1.51E-08 |
| RNA5SP2  | 0.273404 | 1.044812 | 1.934138 | 0.001185 | 0.002921 |
| AC129510 | 0.277458 | 0.786728 | 1.503597 | 2.40E-07 | 2.25E-06 |
| AC010976 | 0.097037 | 0.28784  | 1.568659 | 4.19E-08 | 5.54E-07 |
| SLC25A4  | 18.40836 | 6.12355  | -1.58792 | 6.88E-08 | 8.21E-07 |
| SCARNA4  | 0.070391 | 0.243185 | 1.788583 | 5.28E-05 | 0.000203 |
| RNA5SP1  | 0.058178 | 0.217638 | 1.90338  | 0.013667 | 0.024154 |
| CPXM1    | 1.60229  | 8.253707 | 2.364907 | 1.12E-09 | 3.23E-08 |
| RAB3IP   | 1.124715 | 3.661976 | 1.703062 | 2.79E-11 | 3.02E-09 |
| AL139120 | 0.226336 | 0.720863 | 1.671255 | 3.93E-06 | 2.29E-05 |
| APOA2    | 0.079249 | 39.63358 | 8.966118 | 0.003335 | 0.007134 |
| CA15P1   | 0.075039 | 0.213755 | 1.51025  | 0.00327  | 0.00701  |
| UTAT33   | 0.110735 | 0.340103 | 1.618863 | 1.19E-06 | 8.45E-06 |
| AC073415 | 0.344303 | 1.030507 | 1.581603 | 1.13E-06 | 8.13E-06 |
| AC010275 | 0.048898 | 0.215078 | 2.137016 | 0.00091  | 0.002325 |
| DRICH1   | 0.079825 | 0.269549 | 1.755631 | 1.10E-05 | 5.41E-05 |
| RNU6-10  | 0.157026 | 0.476094 | 1.600243 | 0.001852 | 0.004293 |
| AC087588 | 0.330561 | 1.354216 | 2.034468 | 1.61E-07 | 1.65E-06 |
| AC093826 | 0.09593  | 0.273826 | 1.513203 | 0.007054 | 0.013647 |
| KCNK9    | 0.135658 | 0.472067 | 1.799013 | 0.002018 | 0.00462  |
| AC099518 | 0.155924 | 0.562109 | 1.850003 | 2.63E-07 | 2.43E-06 |
| AL021407 | 0.047569 | 0.269413 | 2.501727 | 1.37E-05 | 6.47E-05 |
| ZIC5     | 0.091918 | 0.939218 | 3.353039 | 1.48E-05 | 6.92E-05 |
| KIF20A   | 2.187633 | 7.650957 | 1.806269 | 1.07E-09 | 3.13E-08 |
| PROM1    | 4.64287  | 13.51268 | 1.541226 | 0.001595 | 0.00377  |
| NHS      | 0.947819 | 2.719515 | 1.520666 | 2.23E-07 | 2.13E-06 |
| AC073575 | 0.114619 | 0.358209 | 1.643955 | 2.35E-08 | 3.47E-07 |

|           |          |          |          |          |          |
|-----------|----------|----------|----------|----------|----------|
| ZBTB46-A  | 0.042851 | 0.580393 | 3.759616 | 0.004735 | 0.009673 |
| COL1A2    | 50.06903 | 192.8901 | 1.945789 | 1.03E-08 | 1.81E-07 |
| RNA5SP2   | 0.07274  | 0.231571 | 1.670631 | 0.000839 | 0.002165 |
| CXCL5     | 13.46146 | 71.81886 | 2.415528 | 0.006869 | 0.013331 |
| AC002546  | 0.601438 | 0.177909 | -1.75728 | 3.23E-05 | 0.000134 |
| SOX15     | 9.951349 | 2.068426 | -2.26636 | 9.76E-06 | 4.90E-05 |
| MIR454    | 0.043359 | 0.24519  | 2.499502 | 0.00026  | 0.00079  |
| MIOX      | 0.087735 | 0.708767 | 3.014087 | 0.00051  | 0.001406 |
| LINC01771 | 0.600961 | 0.203607 | -1.56148 | 0.021779 | 0.036208 |
| IGKV2OR2  | 3.69345  | 0.24146  | -3.93511 | 0.006571 | 0.012842 |
| EPYC      | 0.023514 | 0.624274 | 4.730603 | 6.90E-06 | 3.66E-05 |
| MIR135B   | 0.112238 | 0.521669 | 2.216569 | 5.14E-05 | 0.000198 |
| POU5F1    | 0.510996 | 1.543467 | 1.594792 | 6.03E-05 | 0.000226 |
| RNU5A-81  | 0.174292 | 0.606138 | 1.79814  | 0.002782 | 0.0061   |
| MT-TE     | 3.317113 | 1.045447 | -1.66581 | 0.000301 | 0.000894 |
| AL356740  | 0.140748 | 0.410307 | 1.543584 | 0.003014 | 0.006534 |
| RNU6-85C  | 0.849374 | 3.295847 | 1.956177 | 6.14E-08 | 7.52E-07 |
| AL158824  | 0.121024 | 0.349382 | 1.529507 | 5.62E-07 | 4.51E-06 |
| AC008870  | 0.129971 | 0.369037 | 1.505578 | 0.000263 | 0.000799 |
| IGKV3D-7  | 13.07182 | 1.149693 | -3.50714 | 0.009502 | 0.017657 |
| PEBP4     | 1.527897 | 0.22909  | -2.73756 | 1.41E-09 | 3.88E-08 |
| APOB      | 47.00037 | 2.942697 | -3.99746 | 0.001702 | 0.003984 |
| AP006284  | 0.318505 | 0.949987 | 1.576593 | 2.77E-06 | 1.70E-05 |
| PRAC2     | 0.186185 | 1.011533 | 2.441732 | 3.76E-05 | 0.000153 |
| UBXN10-1  | 5.772033 | 1.004407 | -2.52273 | 6.91E-06 | 3.66E-05 |
| DUSP1     | 331.9223 | 104.5552 | -1.66658 | 2.19E-06 | 1.40E-05 |
| MIR5009   | 0.096042 | 0.387671 | 2.013087 | 0.000459 | 0.001285 |
| PSD       | 12.67187 | 2.375432 | -2.41537 | 0.000991 | 0.002503 |
| TUBB3     | 0.110974 | 0.54119  | 2.285914 | 6.61E-08 | 7.96E-07 |
| MYBPH     | 0.022669 | 0.326548 | 3.848494 | 0.008713 | 0.016381 |
| ADGRG1    | 8.484127 | 24.52492 | 1.53141  | 1.46E-08 | 2.36E-07 |
| SKA3      | 1.740446 | 7.288295 | 2.066125 | 9.72E-11 | 6.00E-09 |
| BBOX1-A1  | 0.756306 | 2.581317 | 1.771065 | 1.74E-06 | 1.15E-05 |
| AC006273  | 0.062245 | 0.235892 | 1.922105 | 1.84E-06 | 1.21E-05 |
| RNU6-93C  | 0.201712 | 0.672967 | 1.738236 | 9.75E-06 | 4.90E-05 |
| MIR4295   | 0.055312 | 0.218422 | 1.98146  | 0.010561 | 0.019325 |
| WNT2      | 0.388098 | 2.58307  | 2.734593 | 5.75E-11 | 4.42E-09 |
| UBD       | 11.45295 | 34.06261 | 1.57247  | 2.35E-06 | 1.48E-05 |
| GDPD5     | 0.609452 | 2.690107 | 2.142079 | 2.56E-09 | 6.06E-08 |
| TBX4      | 0.021083 | 0.47336  | 4.488821 | 0.001307 | 0.003183 |
| MIR320C1  | 0.194768 | 0.873749 | 2.165461 | 2.12E-05 | 9.38E-05 |
| AC115102  | 0.156623 | 0.552696 | 1.819189 | 1.93E-06 | 1.26E-05 |
| SEM1P1    | 0.359287 | 1.125409 | 1.647241 | 5.60E-05 | 0.000213 |
| FAM72A    | 0.093064 | 0.418599 | 2.169277 | 3.07E-11 | 3.14E-09 |
| AP003419  | 0.114775 | 0.391785 | 1.771253 | 1.67E-05 | 7.65E-05 |
| SAPCD2P1  | 0.088563 | 0.2715   | 1.616173 | 1.48E-06 | 1.01E-05 |
| XPNPEP2   | 24.78342 | 3.931954 | -2.65606 | 0.002793 | 0.006119 |
| AL158166  | 0.369759 | 1.261273 | 1.770225 | 2.23E-07 | 2.13E-06 |
| ENPP7P11  | 0.215064 | 0.963833 | 2.164019 | 0.000543 | 0.001484 |
| CXCL9     | 10.09992 | 47.04507 | 2.2197   | 2.66E-07 | 2.45E-06 |
| ZNF887P   | 0.111059 | 0.411876 | 1.890886 | 6.27E-10 | 2.11E-08 |
| AC139720  | 0.151115 | 0.483767 | 1.678665 | 0.001507 | 0.003593 |
| AL627309  | 0.639247 | 2.019544 | 1.659583 | 0.000268 | 0.000811 |
| PABPC1L   | 0.731813 | 4.996046 | 2.77124  | 1.91E-11 | 2.60E-09 |
| HOXA11-1  | 0.145651 | 1.140382 | 2.968928 | 2.31E-08 | 3.43E-07 |
| RNA5SP18  | 0.112285 | 0.575638 | 2.357991 | 4.66E-05 | 0.000183 |
| PART1     | 1.919846 | 0.445234 | -2.10836 | 2.80E-07 | 2.55E-06 |
| AC020978  | 0.179223 | 0.522028 | 1.542369 | 4.46E-06 | 2.55E-05 |

|           |          |          |          |          |          |
|-----------|----------|----------|----------|----------|----------|
| MSR1      | 1.050822 | 3.654397 | 1.798115 | 6.18E-08 | 7.56E-07 |
| ODF2-AS1  | 0.159093 | 0.495076 | 1.637781 | 4.12E-06 | 2.38E-05 |
| RNU6-13C  | 0.109309 | 0.651661 | 2.575717 | 0.00049  | 0.001358 |
| AC091057  | 0.346674 | 1.232518 | 1.829955 | 2.56E-10 | 1.11E-08 |
| AL591895  | 4.460823 | 12.76531 | 1.516847 | 3.37E-08 | 4.66E-07 |
| AC022762  | 0.162921 | 0.567689 | 1.800925 | 9.45E-08 | 1.07E-06 |
| IGLC5     | 0.989035 | 0.28028  | -1.81915 | 0.012901 | 0.022971 |
| MIR4787   | 0.89857  | 0.27668  | -1.69941 | 0.015226 | 0.026515 |
| IGKV1OR-  | 1.545231 | 0.229964 | -2.74834 | 0.02272  | 0.037539 |
| BAAT      | 0.027689 | 2.220307 | 6.325315 | 2.16E-10 | 9.96E-09 |
| GGH       | 3.911492 | 16.71519 | 2.095368 | 2.87E-07 | 2.61E-06 |
| AC007376  | 0.082189 | 0.239207 | 1.541247 | 0.000234 | 0.000721 |
| MIR6783   | 0.043315 | 0.348789 | 3.00942  | 6.36E-05 | 0.000236 |
| AL353691  | 0.108145 | 0.370628 | 1.777003 | 8.52E-06 | 4.38E-05 |
| F2R       | 6.261759 | 22.39161 | 1.838318 | 3.02E-11 | 3.13E-09 |
| IGF2BP2-1 | 0.041953 | 0.246685 | 2.555815 | 2.79E-08 | 3.97E-07 |
| RPL39P36  | 0.571359 | 1.781151 | 1.640339 | 2.81E-09 | 6.54E-08 |
| SLC5A6    | 3.808633 | 11.0639  | 1.538515 | 3.08E-10 | 1.26E-08 |
| TREH      | 5.104449 | 0.486847 | -3.39021 | 0.006119 | 0.012071 |
| MIR4653   | 1.445217 | 4.426057 | 1.614736 | 2.20E-05 | 9.67E-05 |
| AL592301  | 0.114398 | 0.338918 | 1.566873 | 6.56E-07 | 5.13E-06 |
| AL512413  | 0.161901 | 0.982397 | 2.601197 | 7.14E-08 | 8.48E-07 |
| AL355488  | 0.407068 | 1.424135 | 1.806746 | 7.53E-09 | 1.42E-07 |
| DIAPH3    | 0.791071 | 2.336432 | 1.562428 | 5.74E-09 | 1.15E-07 |
| LAMP3     | 2.045368 | 5.952918 | 1.541237 | 3.45E-06 | 2.04E-05 |
| FOXD3     | 0.984747 | 0.28923  | -1.76753 | 0.000116 | 0.000395 |
| PTK7      | 2.729826 | 9.879884 | 1.855685 | 1.49E-07 | 1.54E-06 |
| CSRP1     | 118.0443 | 40.87557 | -1.53002 | 3.46E-05 | 0.000142 |
| KIF15     | 0.783174 | 3.11934  | 1.993835 | 1.91E-10 | 9.13E-09 |
| MIR6812   | 0.098971 | 0.467035 | 2.238454 | 8.63E-05 | 0.000307 |
| LINC02421 | 0.020831 | 0.355871 | 4.094575 | 0.008841 | 0.01659  |
| TRAJ23    | 0.108654 | 0.351885 | 1.69536  | 0.005607 | 0.011193 |
| NCAPH     | 2.076321 | 6.908087 | 1.734256 | 1.82E-09 | 4.68E-08 |
| CYP2W1    | 0.916748 | 15.88561 | 4.115051 | 0.000787 | 0.002047 |
| AP002360  | 0.150564 | 0.697143 | 2.21108  | 3.10E-07 | 2.77E-06 |
| XIRP1     | 0.053936 | 0.233248 | 2.112541 | 4.67E-08 | 6.05E-07 |
| SNORD12   | 0.378918 | 1.086548 | 1.519794 | 0.000882 | 0.002262 |
| ETV4      | 1.787617 | 14.37577 | 3.007529 | 8.84E-11 | 5.71E-09 |
| P2RX2     | 1.215879 | 0.253722 | -2.26068 | 9.73E-10 | 2.94E-08 |
| YRDCP1    | 0.058741 | 0.243884 | 2.053751 | 6.93E-07 | 5.38E-06 |
| SNORD11   | 0.219682 | 0.631271 | 1.522841 | 0.001079 | 0.002692 |
| KCNJ15    | 3.444257 | 1.095244 | -1.65294 | 0.000685 | 0.001812 |
| AC091057  | 0.152266 | 0.606947 | 1.994974 | 4.92E-08 | 6.29E-07 |
| FBXL22    | 4.369903 | 1.513969 | -1.52927 | 0.001608 | 0.003796 |
| NAALADL   | 5.808566 | 1.24095  | -2.22674 | 0.000193 | 0.000612 |
| PDZD4     | 3.591926 | 0.981623 | -1.87152 | 7.15E-06 | 3.77E-05 |
| NNAT      | 14.40078 | 4.095415 | -1.81406 | 0.002101 | 0.004781 |
| AC136475  | 0.336802 | 1.037747 | 1.623481 | 6.44E-08 | 7.81E-07 |
| AL606534  | 0.08233  | 0.344558 | 2.06526  | 1.87E-05 | 8.41E-05 |
| GLIS3-AS1 | 0.062655 | 0.241119 | 1.944241 | 0.003661 | 0.00774  |
| DUTP2     | 0.062583 | 0.330506 | 2.400823 | 6.84E-09 | 1.31E-07 |
| PLAC1     | 0.060122 | 0.300577 | 2.321756 | 0.007678 | 0.014684 |
| RNU4-4P   | 0.053632 | 0.321794 | 2.58498  | 5.97E-05 | 0.000225 |
| AL354928  | 0.053695 | 0.226607 | 2.077328 | 1.50E-06 | 1.02E-05 |
| SLED1     | 0.114683 | 0.404653 | 1.819039 | 0.001183 | 0.002918 |
| NCAPD2P   | 0.029171 | 0.284373 | 3.285175 | 3.15E-08 | 4.41E-07 |
| MC1R      | 0.214139 | 0.638226 | 1.57552  | 3.23E-09 | 7.25E-08 |
| SNORD6    | 1.141315 | 4.178518 | 1.872294 | 3.81E-07 | 3.28E-06 |

|          |          |          |          |          |          |
|----------|----------|----------|----------|----------|----------|
| MCRIP2P1 | 0.065716 | 0.296181 | 2.172172 | 5.09E-06 | 2.85E-05 |
| AC022784 | 0.0165   | 0.271078 | 4.038189 | 8.07E-08 | 9.38E-07 |
| AC025176 | 0.075335 | 0.344423 | 2.192799 | 1.59E-06 | 1.07E-05 |
| ELOVL2   | 0.189572 | 0.615287 | 1.698518 | 0.018311 | 0.031102 |
| M1AP     | 0.189102 | 1.046461 | 2.468279 | 0.000201 | 0.000632 |
| AC137894 | 0.088088 | 0.476018 | 2.433994 | 0.002472 | 0.005505 |
| ARMC2-A  | 0.072422 | 0.279351 | 1.947581 | 0.00723  | 0.013935 |
| CENPI    | 0.443658 | 1.716722 | 1.952136 | 1.52E-11 | 2.46E-09 |
| AC011447 | 0.149276 | 0.445215 | 1.576522 | 0.002623 | 0.005795 |
| CALY     | 1.075228 | 0.264314 | -2.02432 | 2.49E-05 | 0.000107 |
| RNF207   | 0.915185 | 2.676235 | 1.54807  | 6.10E-08 | 7.48E-07 |
| CSAG3    | 0.012999 | 1.413961 | 6.76516  | 4.57E-05 | 0.00018  |
| CREG2    | 0.052674 | 0.521701 | 3.308061 | 7.65E-07 | 5.86E-06 |
| LDB3     | 7.22597  | 1.714679 | -2.07525 | 4.15E-06 | 2.39E-05 |
| ZWINT    | 6.268105 | 17.79962 | 1.505745 | 1.01E-08 | 1.79E-07 |
| CLEC3B   | 33.13421 | 3.895721 | -3.08836 | 2.30E-10 | 1.03E-08 |
| AC009268 | 0.058517 | 0.264942 | 2.178754 | 8.37E-08 | 9.68E-07 |
| AC004466 | 0.084955 | 0.303524 | 1.837045 | 1.94E-06 | 1.26E-05 |
| RNU6-58  | 0.073559 | 0.385938 | 2.391399 | 3.85E-05 | 0.000156 |
| RNU6-76  | 0.185701 | 0.890918 | 2.262313 | 3.92E-07 | 3.35E-06 |
| HMGB1P2  | 0.09871  | 0.304757 | 1.626391 | 3.56E-07 | 3.10E-06 |
| AC021739 | 0.06407  | 0.242891 | 1.92259  | 1.34E-07 | 1.42E-06 |
| AC027449 | 0.110089 | 0.316895 | 1.525335 | 0.024537 | 0.040133 |
| AC078860 | 0.021355 | 0.229338 | 3.424827 | 3.85E-05 | 0.000156 |
| RNU6-46  | 0.156196 | 0.48097  | 1.622592 | 0.002271 | 0.005118 |
| COL8A1   | 2.606164 | 8.884216 | 1.769316 | 2.16E-06 | 1.38E-05 |
| FEZF1    | 0.059811 | 1.167955 | 4.287434 | 9.24E-10 | 2.83E-08 |
| NCAPG    | 1.445708 | 4.978691 | 1.78399  | 3.37E-09 | 7.47E-08 |
| AC097493 | 0.045653 | 0.233279 | 2.353263 | 7.26E-05 | 0.000265 |
| ALKAL1   | 0.170198 | 1.525709 | 3.164194 | 1.42E-09 | 3.88E-08 |
| HIST1H2B | 0.01879  | 0.288536 | 3.940689 | 0.000904 | 0.002311 |
| HOXC10   | 0.898443 | 7.470507 | 3.055707 | 3.32E-09 | 7.39E-08 |
| GNGT1    | 0.017713 | 0.564786 | 4.994785 | 5.35E-05 | 0.000205 |
| LEXM     | 1.821993 | 0.20272  | -3.16795 | 0.002915 | 0.006348 |
| RNU7-15  | 0.120472 | 0.350359 | 1.540137 | 0.01004  | 0.01852  |
| CLDN2    | 3.970414 | 27.34376 | 2.78385  | 0.000485 | 0.001345 |
| AC127526 | 0.086548 | 0.354653 | 2.034841 | 2.13E-06 | 1.37E-05 |
| LINC0085 | 0.025224 | 0.406423 | 4.010119 | 1.85E-07 | 1.84E-06 |
| AC091053 | 0.072671 | 0.25631  | 1.818442 | 3.17E-07 | 2.83E-06 |
| RNU6-79  | 0.165763 | 0.593014 | 1.838944 | 4.23E-05 | 0.000169 |
| SGCA     | 10.365   | 2.376383 | -2.12488 | 6.32E-07 | 4.97E-06 |
| MAB21L2  | 1.391493 | 0.461965 | -1.59078 | 2.07E-05 | 9.17E-05 |
| AC007347 | 0.079865 | 0.311269 | 1.96253  | 9.84E-07 | 7.23E-06 |
| STRIP2   | 0.347496 | 1.682968 | 2.27594  | 9.57E-11 | 5.99E-09 |
| AL662797 | 0.145943 | 0.436587 | 1.580864 | 1.01E-09 | 2.99E-08 |
| AC044839 | 0.015574 | 0.365991 | 4.554565 | 0.006369 | 0.012494 |
| MYB      | 1.718035 | 5.85596  | 1.769146 | 1.50E-06 | 1.02E-05 |
| SNORA24  | 0.044544 | 0.288056 | 2.693058 | 3.44E-06 | 2.04E-05 |
| TMEM252  | 3.649067 | 0.904489 | -2.01235 | 4.33E-06 | 2.49E-05 |
| TMEM132  | 2.283421 | 6.531364 | 1.516188 | 5.38E-07 | 4.36E-06 |
| C2CD4D   | 0.685799 | 1.988772 | 1.53602  | 3.65E-07 | 3.17E-06 |
| LRR1Q4   | 0.090426 | 0.440769 | 2.285211 | 5.87E-07 | 4.67E-06 |
| FNDC1    | 1.95779  | 11.63795 | 2.57154  | 9.31E-09 | 1.68E-07 |
| GNAO1    | 6.842627 | 2.252137 | -1.60326 | 0.001341 | 0.003251 |
| MCEMP1   | 0.19736  | 0.621213 | 1.654257 | 0.001097 | 0.002731 |
| HNF1B    | 1.968868 | 6.546282 | 1.73331  | 4.35E-07 | 3.66E-06 |
| MIR3129  | 0.346395 | 1.362257 | 1.97551  | 0.005872 | 0.011645 |
| CXCL1    | 14.62557 | 61.3474  | 2.068509 | 6.72E-07 | 5.24E-06 |

|           |          |          |          |          |          |
|-----------|----------|----------|----------|----------|----------|
| MT1M      | 15.74503 | 3.122673 | -2.33404 | 9.07E-10 | 2.80E-08 |
| DPF1      | 0.084677 | 0.329976 | 1.962315 | 2.40E-08 | 3.51E-07 |
| AC097478  | 0.007963 | 0.282365 | 5.148094 | 2.93E-05 | 0.000123 |
| KIFC1     | 3.15145  | 9.710377 | 1.623512 | 8.92E-09 | 1.62E-07 |
| AP003498  | 0.084632 | 0.346125 | 2.032015 | 0.008567 | 0.016146 |
| DSCR8     | 0.008385 | 0.95366  | 6.829544 | 0.000616 | 0.001654 |
| SLC51B    | 8.979478 | 1.931698 | -2.21676 | 0.00339  | 0.00724  |
| CLPSL2    | 0.009074 | 0.249599 | 4.781787 | 2.22E-05 | 9.76E-05 |
| RAD51     | 1.394684 | 3.969217 | 1.508916 | 1.77E-09 | 4.59E-08 |
| KIF11     | 3.222254 | 10.74564 | 1.737609 | 3.71E-10 | 1.43E-08 |
| EN2       | 0.031649 | 0.671233 | 4.406584 | 0.014336 | 0.025185 |
| CDCA5     | 2.093641 | 7.440588 | 1.829402 | 8.80E-10 | 2.74E-08 |
| AL121832  | 0.04336  | 0.342583 | 2.982009 | 0.001381 | 0.003336 |
| RNU6-12   | 0.223795 | 0.784915 | 1.810357 | 5.88E-05 | 0.000222 |
| AC107072  | 0.092517 | 0.269761 | 1.543886 | 1.96E-05 | 8.75E-05 |
| AL391832  | 0.037634 | 0.212271 | 2.495781 | 1.11E-05 | 5.47E-05 |
| AL121832  | 0.106533 | 0.533025 | 2.322902 | 7.57E-10 | 2.45E-08 |
| AC103996  | 0.074788 | 0.226527 | 1.5988   | 0.003802 | 0.007998 |
| AL590004  | 0.161674 | 0.564896 | 1.804897 | 0.02216  | 0.036743 |
| ATP11A    | 2.974281 | 13.62521 | 2.195666 | 1.74E-12 | 1.40E-09 |
| LRRN4     | 0.089936 | 0.769641 | 3.097222 | 2.86E-06 | 1.75E-05 |
| HPGD      | 46.40773 | 10.41339 | -2.15593 | 1.33E-07 | 1.41E-06 |
| SNORD19   | 0.42826  | 1.397806 | 1.706604 | 1.70E-05 | 7.78E-05 |
| RAB5CP1   | 0.090758 | 0.301369 | 1.731432 | 2.05E-05 | 9.10E-05 |
| SIGLEC11  | 1.148159 | 0.239525 | -2.26107 | 0.000112 | 0.000382 |
| LPAR3     | 0.738821 | 0.229675 | -1.68563 | 0.00918  | 0.017139 |
| RF00569   | 0.276708 | 1.135661 | 2.037097 | 2.14E-07 | 2.06E-06 |
| AC103739  | 0.147333 | 0.41867  | 1.506731 | 1.43E-06 | 9.77E-06 |
| FCHO1     | 1.153874 | 3.390524 | 1.555023 | 2.17E-07 | 2.08E-06 |
| HPSE2     | 2.785721 | 0.326119 | -3.09458 | 1.96E-07 | 1.92E-06 |
| MT1G      | 168.8175 | 52.72388 | -1.67894 | 0.000468 | 0.001305 |
| AL022316  | 0.145553 | 0.726264 | 2.318948 | 7.24E-07 | 5.57E-06 |
| AC007849  | 0.541986 | 1.775063 | 1.711541 | 0.002239 | 0.005056 |
| FAM238B   | 0.012751 | 0.222917 | 4.127824 | 2.39E-05 | 0.000104 |
| C1QTNF1   | 0.077212 | 0.260739 | 1.755717 | 0.007708 | 0.014731 |
| MIR7851   | 0.084528 | 0.309767 | 1.873683 | 0.000775 | 0.002018 |
| SNX10     | 2.393666 | 7.303239 | 1.609315 | 2.79E-09 | 6.50E-08 |
| NDUFA3P   | 0.128203 | 0.416441 | 1.699677 | 9.37E-05 | 0.000328 |
| RNU6-57F  | 0.064399 | 0.269688 | 2.066175 | 0.000542 | 0.001483 |
| AC007342  | 0.565065 | 1.867221 | 1.724405 | 5.18E-05 | 0.000199 |
| PMEPA1    | 6.76393  | 38.75541 | 2.518464 | 3.79E-11 | 3.55E-09 |
| RF00575   | 0.057033 | 0.244112 | 2.097667 | 0.001223 | 0.003004 |
| ALDH3A1   | 69.08124 | 11.63006 | -2.57044 | 6.54E-05 | 0.000242 |
| RNU6-13   | 0.125946 | 0.473011 | 1.909067 | 0.000507 | 0.001399 |
| RGS2      | 63.03849 | 20.67159 | -1.60858 | 5.18E-07 | 4.23E-06 |
| RN7SL19P  | 0.093968 | 0.308989 | 1.717316 | 1.59E-05 | 7.35E-05 |
| RNU6-11   | 0.180042 | 1.355997 | 2.912946 | 4.82E-06 | 2.72E-05 |
| AL359880  | 0.062985 | 0.371749 | 2.561239 | 2.95E-08 | 4.17E-07 |
| PRKN      | 1.5227   | 0.53771  | -1.50173 | 1.44E-06 | 9.87E-06 |
| AC008443  | 0.32458  | 0.919919 | 1.502934 | 0.001238 | 0.003036 |
| C20orf144 | 0.085961 | 0.264044 | 1.619034 | 7.42E-09 | 1.40E-07 |
| AL513217  | 0.695132 | 0.189442 | -1.87553 | 0.000737 | 0.001934 |
| AC007128  | 0.026075 | 0.511653 | 4.294436 | 1.06E-09 | 3.10E-08 |
| ALPG      | 0.506487 | 10.78031 | 4.41173  | 2.94E-07 | 2.66E-06 |
| SPARC     | 70.24325 | 210.5866 | 1.583982 | 1.25E-08 | 2.10E-07 |
| OSBPL3    | 2.587628 | 7.820588 | 1.595647 | 2.37E-11 | 2.88E-09 |
| AL357054  | 1.551564 | 0.494482 | -1.64973 | 0.000413 | 0.001171 |
| ABCA9     | 1.292077 | 0.451751 | -1.51609 | 0.000685 | 0.001812 |

|          |          |          |          |          |          |
|----------|----------|----------|----------|----------|----------|
| FOXM1    | 4.187632 | 17.2093  | 2.038982 | 2.00E-10 | 9.43E-09 |
| F2       | 0.035496 | 0.804483 | 4.502342 | 0.003812 | 0.008017 |
| RF02247  | 0.016052 | 0.375495 | 4.547961 | 6.84E-05 | 0.000252 |
| RF01169  | 0.054613 | 0.297109 | 2.443661 | 1.72E-05 | 7.86E-05 |
| CRP      | 0.025347 | 1.169784 | 5.528257 | 0.005682 | 0.011331 |
| MIR5194  | 0.192978 | 0.932759 | 2.27307  | 1.47E-06 | 1.00E-05 |
| LINC0181 | 0.066224 | 0.279627 | 2.07808  | 4.73E-10 | 1.72E-08 |
| AC097372 | 0.064184 | 0.226599 | 1.819853 | 6.55E-06 | 3.51E-05 |
| AC005522 | 0.055549 | 0.276375 | 2.3148   | 3.28E-07 | 2.92E-06 |
| PDK4     | 98.77031 | 18.75195 | -2.39704 | 1.42E-07 | 1.48E-06 |
| MIR4530  | 1.126719 | 0.354209 | -1.66946 | 0.001149 | 0.002846 |
| ULBP1    | 0.054206 | 0.391897 | 2.853961 | 5.13E-08 | 6.50E-07 |
| SNORA74  | 0.106114 | 0.37528  | 1.822348 | 7.61E-06 | 3.98E-05 |
| RNU6-12  | 0.111112 | 0.703263 | 2.661947 | 8.67E-07 | 6.49E-06 |
| AC046143 | 0.325129 | 0.933784 | 1.522078 | 7.06E-08 | 8.40E-07 |
| HS3ST2   | 0.299053 | 1.328711 | 2.151553 | 4.39E-05 | 0.000174 |
| ASPM     | 0.978912 | 4.276198 | 2.127077 | 2.81E-10 | 1.19E-08 |
| AC092919 | 0.067043 | 0.257721 | 1.942656 | 0.005249 | 0.01058  |
| C2orf40  | 53.39315 | 6.137684 | -3.12089 | 1.40E-08 | 2.29E-07 |
| AC096745 | 1.366017 | 0.407574 | -1.74484 | 0.000405 | 0.001152 |
| AC103957 | 0.180969 | 0.527271 | 1.542802 | 0.01351  | 0.023917 |
| AC008514 | 0.17585  | 1.273365 | 2.856226 | 0.000199 | 0.000627 |
| RNA5SP2  | 0.08529  | 0.290501 | 1.768086 | 0.00574  | 0.011424 |
| AC016394 | 0.578685 | 1.80022  | 1.637324 | 3.60E-10 | 1.40E-08 |
| COL27A1  | 1.202293 | 3.854501 | 1.680755 | 7.79E-07 | 5.93E-06 |
| CNKSRR2  | 1.13913  | 0.301725 | -1.91663 | 0.00197  | 0.004522 |
| MIR378G  | 0.105004 | 0.993924 | 3.242688 | 9.44E-06 | 4.77E-05 |
| AL359881 | 0.11211  | 0.506897 | 2.176779 | 0.000205 | 0.000644 |
| DLEU7    | 0.079032 | 0.342788 | 2.116811 | 1.93E-12 | 1.40E-09 |
| MIR25    | 1.124357 | 3.431506 | 1.609742 | 3.28E-07 | 2.92E-06 |
| AQP2     | 0.030273 | 0.97827  | 5.014131 | 0.001821 | 0.004227 |
| AC087269 | 0.084481 | 0.533015 | 2.657475 | 3.86E-06 | 2.25E-05 |
| CYP2B6   | 1.725835 | 5.343821 | 1.630577 | 2.84E-05 | 0.00012  |
| AC013731 | 0.119671 | 0.384654 | 1.684494 | 3.04E-06 | 1.84E-05 |
| CPN1     | 0.013052 | 0.332726 | 4.671974 | 0.000963 | 0.002442 |
| RN7SL505 | 0.066425 | 0.239833 | 1.852224 | 7.16E-06 | 3.77E-05 |
| RNY4P19  | 0.076097 | 0.401876 | 2.400838 | 0.000826 | 0.002139 |
| AC007342 | 0.347506 | 1.531517 | 2.139852 | 4.48E-06 | 2.56E-05 |
| SLC5A2   | 0.075115 | 0.267878 | 1.834409 | 8.91E-08 | 1.02E-06 |
| AC090673 | 0.038168 | 0.340755 | 3.158285 | 5.64E-10 | 1.95E-08 |
| TNNI3    | 0.229837 | 0.844716 | 1.877857 | 9.75E-06 | 4.90E-05 |
| SHANK2   | 0.060173 | 0.262925 | 2.12747  | 3.24E-05 | 0.000134 |
| IGKV2-4  | 0.948666 | 0.197734 | -2.26234 | 0.011255 | 0.020416 |
| PCAT1    | 0.062255 | 0.271371 | 2.123998 | 2.50E-08 | 3.63E-07 |
| RN7SL541 | 0.05858  | 0.393901 | 2.74935  | 2.96E-08 | 4.19E-07 |
| MIR579   | 0.08096  | 0.379073 | 2.227186 | 4.01E-05 | 0.000162 |
| AC019227 | 0.19122  | 0.554681 | 1.536425 | 0.000518 | 0.001425 |
| ZFP36    | 508.7434 | 175.021  | -1.53941 | 3.36E-05 | 0.000138 |
| CCL20    | 13.58526 | 49.59117 | 1.868041 | 0.003496 | 0.007441 |
| KIF18A   | 0.659115 | 3.013702 | 2.192935 | 4.17E-11 | 3.74E-09 |
| MAMDC2   | 11.80861 | 1.588056 | -2.89451 | 2.08E-09 | 5.17E-08 |
| LIMS2    | 15.40251 | 4.59363  | -1.74546 | 0.000166 | 0.000535 |
| AC124067 | 0.152924 | 1.301434 | 3.089214 | 1.47E-05 | 6.89E-05 |
| DPT      | 64.33818 | 5.348179 | -3.58856 | 8.53E-12 | 2.04E-09 |
| SLC22A1  | 0.084968 | 0.264856 | 1.640208 | 7.19E-05 | 0.000262 |
| AC073957 | 0.31106  | 1.152581 | 1.889605 | 4.37E-09 | 9.16E-08 |
| STMN2    | 4.263079 | 1.189122 | -1.842   | 0.002502 | 0.005564 |
| PTN      | 18.63078 | 5.014096 | -1.89363 | 2.11E-07 | 2.05E-06 |



|           |          |          |          |          |          |
|-----------|----------|----------|----------|----------|----------|
| MIR5582   | 0.106509 | 0.301841 | 1.502817 | 0.026905 | 0.043449 |
| IGKV2D-2  | 1.416957 | 0.192317 | -2.88124 | 0.012345 | 0.022073 |
| LRRC15    | 0.95127  | 3.007139 | 1.660465 | 0.000154 | 0.000503 |
| RNU6-11f  | 0.055021 | 0.320989 | 2.54448  | 0.000175 | 0.000561 |
| AMTN      | 1.468623 | 0.289979 | -2.34044 | 5.31E-05 | 0.000204 |
| MT1A      | 11.46396 | 3.68711  | -1.63654 | 2.75E-08 | 3.94E-07 |
| RNU6-47c  | 0.078731 | 0.228526 | 1.537347 | 0.013167 | 0.023381 |
| AC090709  | 0.021424 | 0.349152 | 4.026543 | 0.000118 | 0.000401 |
| DUSP26    | 1.357639 | 0.472552 | -1.52255 | 1.26E-05 | 6.06E-05 |
| UHRF1     | 1.249836 | 5.419974 | 2.116547 | 3.22E-11 | 3.24E-09 |
| MIR548AC  | 0.094826 | 0.499495 | 2.397111 | 0.001193 | 0.002939 |
| LINC01977 | 0.062183 | 0.343811 | 2.467035 | 9.86E-06 | 4.94E-05 |
| MIR200C   | 0.057035 | 0.242598 | 2.08864  | 0.001499 | 0.003581 |
| RNU6-11f  | 0.259882 | 0.906056 | 1.801745 | 2.11E-06 | 1.36E-05 |
| AC108463  | 0.071598 | 0.354187 | 2.306529 | 1.35E-10 | 7.40E-09 |
| AC087222  | 0.205617 | 0.608584 | 1.565498 | 6.07E-06 | 3.30E-05 |
| PRR7      | 2.658314 | 9.294197 | 1.805819 | 3.23E-10 | 1.30E-08 |
| RPL21P65  | 0.06773  | 0.223522 | 1.722538 | 2.36E-05 | 0.000103 |
| MIR1245A  | 0.104992 | 0.532202 | 2.341698 | 0.000837 | 0.002163 |
| LINC02321 | 0.073138 | 0.3316   | 2.180752 | 0.000245 | 0.00075  |
| USP32P3   | 0.064504 | 0.22753  | 1.818609 | 5.93E-06 | 3.24E-05 |
| MIR4635   | 0.458884 | 2.03161  | 2.146423 | 1.64E-06 | 1.09E-05 |
| SNORD7    | 0.218959 | 0.982807 | 2.166246 | 5.58E-07 | 4.49E-06 |
| MIR4753   | 0.089806 | 0.345788 | 1.945006 | 0.010643 | 0.019442 |
| HBA1      | 12.07828 | 2.540965 | -2.24897 | 2.05E-09 | 5.11E-08 |
| ATP4B     | 304.7412 | 10.49374 | -4.85998 | 0.001664 | 0.00391  |
| TPM2      | 245.9354 | 73.90878 | -1.73446 | 0.002367 | 0.005301 |
| MIR4261   | 0.166492 | 1.103014 | 2.727928 | 3.07E-06 | 1.85E-05 |
| AL353705  | 0.113621 | 0.339964 | 1.581153 | 0.002338 | 0.005245 |
| ARL4AP5   | 0.07448  | 0.251322 | 1.754611 | 1.18E-07 | 1.28E-06 |
| AP003108  | 0.027032 | 0.221712 | 3.035923 | 0.00713  | 0.013775 |
| LINC02166 | 0.009645 | 0.9301   | 6.591412 | 2.92E-10 | 1.21E-08 |
| FOXE3     | 0.018277 | 0.245694 | 3.748768 | 8.84E-09 | 1.61E-07 |
| AP001542  | 0.062382 | 0.486373 | 2.962867 | 2.61E-06 | 1.62E-05 |
| KIF24     | 0.63124  | 2.04136  | 1.693271 | 1.21E-10 | 6.81E-09 |
| RUNX1     | 2.61365  | 8.496407 | 1.700787 | 1.79E-11 | 2.51E-09 |
| ZNF812P   | 5.231531 | 0.535398 | -3.28855 | 0.000843 | 0.002174 |
| CHEK1     | 1.19334  | 3.725808 | 1.642548 | 3.44E-11 | 3.31E-09 |
| DNAH14    | 0.069233 | 0.296797 | 2.099953 | 0.000223 | 0.00069  |
| MIR589    | 0.296471 | 0.994012 | 1.745371 | 3.15E-06 | 1.89E-05 |
| LINC02081 | 0.300048 | 2.258119 | 2.911858 | 3.43E-07 | 3.01E-06 |
| AL136982  | 0.089093 | 0.269909 | 1.599095 | 1.05E-05 | 5.23E-05 |
| IGKV1OR2  | 7.183942 | 0.840853 | -3.09485 | 0.021881 | 0.036348 |
| THBS2     | 6.168096 | 28.70828 | 2.21857  | 6.02E-08 | 7.39E-07 |
| AL121721  | 0.017088 | 0.282508 | 4.047215 | 3.67E-05 | 0.00015  |
| AC005086  | 0.300407 | 0.857307 | 1.512892 | 0.001225 | 0.003008 |
| MIR3945H  | 0.129976 | 0.556082 | 2.097048 | 1.20E-05 | 5.83E-05 |
| CST5      | 0.051006 | 0.248037 | 2.281823 | 0.000356 | 0.001032 |
| AC010487  | 0.18028  | 0.657087 | 1.86585  | 2.06E-06 | 1.33E-05 |
| RNA5SP2f  | 0.068632 | 0.274981 | 2.002385 | 0.006506 | 0.01273  |
| RF02246   | 0.029178 | 0.825786 | 4.822796 | 9.11E-05 | 0.000321 |
| MCM4      | 6.456335 | 18.70196 | 1.534402 | 2.83E-09 | 6.55E-08 |
| HMGNI1P1  | 0.074925 | 0.221524 | 1.563939 | 0.000395 | 0.001128 |
| AL035458  | 0.202102 | 0.676322 | 1.742627 | 5.98E-07 | 4.75E-06 |
| AC004233  | 0.054528 | 0.267117 | 2.292392 | 0.000453 | 0.00127  |
| GPC2      | 0.079951 | 0.321928 | 2.009551 | 6.04E-06 | 3.28E-05 |
| RNU6-10c  | 0.084213 | 0.285461 | 1.761181 | 0.007942 | 0.015125 |
| ARL9      | 0.418095 | 1.244685 | 1.573877 | 9.64E-05 | 0.000336 |

|          |          |          |          |          |          |
|----------|----------|----------|----------|----------|----------|
| PF4V1    | 0.095291 | 0.359416 | 1.915234 | 0.001862 | 0.004311 |
| SNORD12  | 0.607266 | 3.672704 | 2.596442 | 8.16E-11 | 5.47E-09 |
| ZFP42    | 0.011385 | 0.301607 | 4.727408 | 0.004035 | 0.008427 |
| AL391832 | 0.253639 | 0.87864  | 1.792497 | 8.91E-07 | 6.63E-06 |
| BRCA1    | 1.184962 | 3.51892  | 1.570292 | 1.10E-10 | 6.51E-09 |
| AL356320 | 0.160037 | 0.555904 | 1.796427 | 6.51E-07 | 5.10E-06 |
| AC018641 | 0.01366  | 0.273161 | 4.321695 | 7.60E-08 | 8.92E-07 |
| SOX21-AS | 4.642353 | 1.349135 | -1.78282 | 0.000627 | 0.001679 |
| SALL4    | 0.061807 | 2.200915 | 5.154187 | 3.27E-12 | 1.40E-09 |
| LARP1P1  | 0.05848  | 0.243341 | 2.056959 | 2.45E-05 | 0.000106 |
| AC013652 | 0.078112 | 0.330279 | 2.080061 | 1.96E-05 | 8.75E-05 |
| AC011773 | 0.093527 | 0.346257 | 1.888388 | 7.57E-07 | 5.81E-06 |
| RNU1-72F | 0.03192  | 0.229264 | 2.844479 | 0.000428 | 0.00121  |
| RNA5SP3  | 0.124912 | 0.370552 | 1.56876  | 0.005692 | 0.011341 |
| F2RL2    | 1.491704 | 6.953279 | 2.220732 | 4.77E-09 | 9.85E-08 |
| SCNN1B   | 13.43332 | 1.055161 | -3.67028 | 1.19E-10 | 6.77E-09 |
| PARPBP   | 0.973073 | 2.940527 | 1.595454 | 2.14E-09 | 5.28E-08 |
| LINC0095 | 0.097926 | 0.382232 | 1.96469  | 0.001595 | 0.00377  |
| PPP1R14A | 34.47669 | 10.66932 | -1.69215 | 4.60E-06 | 2.61E-05 |
| RNU4-25F | 0.053532 | 0.230517 | 2.106389 | 0.00036  | 0.001041 |
| PVR      | 8.74607  | 25.18279 | 1.525731 | 7.08E-11 | 5.00E-09 |
| RNU2-22F | 0.1145   | 0.370606 | 1.694538 | 0.002276 | 0.005123 |
| SLC17A9  | 2.206332 | 9.844993 | 2.15774  | 2.71E-08 | 3.89E-07 |
| DACT3    | 9.599488 | 3.168492 | -1.59916 | 0.000151 | 0.000495 |
| AC015883 | 0.163837 | 0.584388 | 1.834662 | 7.88E-07 | 5.99E-06 |
| FRGCA    | 0.02841  | 0.25849  | 3.18565  | 0.000951 | 0.002414 |
| SNORA9B  | 0.130844 | 0.609224 | 2.21912  | 1.28E-07 | 1.36E-06 |
| DDX50P1  | 0.083864 | 0.249793 | 1.574603 | 1.25E-08 | 2.10E-07 |
| UPK3A    | 0.259267 | 3.654198 | 3.817044 | 0.027505 | 0.044321 |
| SOHLH1   | 0.005069 | 0.414577 | 6.353694 | 0.000329 | 0.000964 |
| AC233280 | 0.146922 | 0.656093 | 2.15885  | 1.13E-07 | 1.24E-06 |
| AL163953 | 0.075453 | 0.438352 | 2.538435 | 0.000282 | 0.000844 |
| TMEM74B  | 0.84007  | 3.065274 | 1.867435 | 7.91E-05 | 0.000284 |
| IGKV2-40 | 2.486435 | 0.449821 | -2.46666 | 0.019841 | 0.033378 |
| AC108451 | 0.307732 | 1.026782 | 1.738382 | 0.004181 | 0.008688 |
| ATP2A1   | 0.159196 | 0.493154 | 1.631232 | 1.18E-07 | 1.28E-06 |
| RFX8     | 0.039824 | 0.218677 | 2.457095 | 2.57E-08 | 3.72E-07 |
| GTF2IP9  | 0.288504 | 0.821875 | 1.510326 | 4.92E-06 | 2.76E-05 |
| CATIP-AS | 0.11928  | 0.480866 | 2.011284 | 6.39E-07 | 5.02E-06 |
| APOA4    | 495.4121 | 8.475145 | -5.86925 | 0.009864 | 0.018238 |
| AL035456 | 0.116532 | 0.379024 | 1.701562 | 4.00E-10 | 1.52E-08 |
| AL117381 | 0.236058 | 0.882139 | 1.901865 | 4.41E-07 | 3.69E-06 |
| MIR548I2 | 0.185723 | 0.795267 | 2.098289 | 4.25E-05 | 0.00017  |
| LBP      | 0.076918 | 1.965733 | 4.675593 | 0.000773 | 0.002014 |
| ZNF695   | 0.096426 | 0.648019 | 2.748537 | 3.71E-10 | 1.43E-08 |
| AC122688 | 0.225682 | 0.643308 | 1.511217 | 3.07E-08 | 4.31E-07 |
| AC010343 | 0.012991 | 0.279795 | 4.42877  | 0.002059 | 0.004701 |
| KRT23    | 0.421981 | 14.67923 | 5.120454 | 6.87E-05 | 0.000253 |
| MUC12    | 0.204891 | 1.725131 | 3.073781 | 3.20E-05 | 0.000133 |
| RAD51AP  | 1.458185 | 6.195384 | 2.08702  | 1.71E-11 | 2.48E-09 |
| RNU6-55  | 0.079447 | 0.284797 | 1.841868 | 0.000582 | 0.001578 |
| TSPEAR   | 0.072803 | 0.414208 | 2.508294 | 3.17E-05 | 0.000132 |
| AC105219 | 0.076927 | 0.621822 | 3.014937 | 1.41E-08 | 2.31E-07 |
| AC073657 | 0.20061  | 0.611556 | 1.60809  | 6.68E-05 | 0.000247 |
| CYCSP6   | 0.165226 | 1.051589 | 2.670062 | 0.000358 | 0.001037 |
| TRIP13   | 1.405273 | 6.954613 | 2.30712  | 2.61E-11 | 2.91E-09 |
| PRKCG    | 0.409128 | 1.818149 | 2.151847 | 4.65E-06 | 2.63E-05 |
| AC087620 | 0.216928 | 0.634807 | 1.549104 | 0.000205 | 0.000642 |

|           |          |          |          |          |          |
|-----------|----------|----------|----------|----------|----------|
| CNTN1     | 4.610052 | 1.015943 | -2.18196 | 2.37E-05 | 0.000103 |
| LINCR-001 | 0.108764 | 0.808474 | 2.894003 | 2.73E-06 | 1.69E-05 |
| FCGR1A    | 0.412078 | 1.545693 | 1.907263 | 2.21E-09 | 5.41E-08 |
| NCR3LG1   | 0.800907 | 3.024966 | 1.917213 | 1.35E-07 | 1.42E-06 |
| WSCD2     | 2.776643 | 0.714847 | -1.95763 | 1.76E-05 | 8.00E-05 |
| GCNT4     | 6.690099 | 1.457384 | -2.19865 | 1.08E-07 | 1.19E-06 |
| AC103740  | 0.737456 | 0.183284 | -2.00847 | 0.013636 | 0.0241   |
| LINC0088  | 0.281593 | 0.842464 | 1.581003 | 2.43E-06 | 1.53E-05 |
| BX470102  | 0.836459 | 2.79847  | 1.742272 | 1.04E-06 | 7.60E-06 |
| PROX1     | 0.534017 | 3.416248 | 2.677456 | 0.022299 | 0.036936 |
| PRC1-AS1  | 0.08585  | 0.278387 | 1.697204 | 1.45E-07 | 1.51E-06 |
| MIR548AA  | 0.178553 | 0.968063 | 2.438752 | 9.36E-07 | 6.92E-06 |
| U47924.1  | 0.067097 | 0.243334 | 1.858612 | 1.11E-05 | 5.43E-05 |
| BPIFA2    | 0.017814 | 0.842084 | 5.562841 | 1.32E-05 | 6.29E-05 |
| DNAJB5    | 11.90185 | 3.472122 | -1.7773  | 6.87E-05 | 0.000253 |
| KIF23     | 1.14474  | 5.156333 | 2.171325 | 3.12E-11 | 3.15E-09 |
| LHX4      | 0.113989 | 0.330221 | 1.534532 | 3.42E-09 | 7.54E-08 |
| AP000943  | 0.008109 | 0.319074 | 5.298234 | 2.97E-06 | 1.80E-05 |
| VEGFD     | 4.127582 | 0.644971 | -2.67799 | 1.21E-10 | 6.81E-09 |
| TPSP2     | 0.012822 | 0.267796 | 4.384409 | 1.62E-05 | 7.46E-05 |
| LRGUK     | 0.064438 | 0.256007 | 1.990202 | 6.97E-07 | 5.41E-06 |
| COX7A1    | 18.72902 | 6.323361 | -1.56651 | 1.55E-06 | 1.05E-05 |
| FAM19A4   | 6.570484 | 0.393004 | -4.06338 | 0.00013  | 0.000436 |
| LINC0039  | 0.018088 | 0.352763 | 4.285612 | 0.025245 | 0.041127 |
| AC024940  | 0.150541 | 0.426803 | 1.503415 | 1.41E-06 | 9.68E-06 |
| KCNA5     | 3.356857 | 0.543555 | -2.62661 | 2.19E-06 | 1.40E-05 |
| TMEM35A   | 5.727978 | 0.874889 | -2.71085 | 9.94E-07 | 7.29E-06 |
| AP000919  | 0.124354 | 0.359275 | 1.530634 | 1.26E-07 | 1.35E-06 |
| IGKV1OR   | 2.951802 | 0.272386 | -3.43787 | 0.005273 | 0.010627 |
| LYVE1     | 10.28962 | 1.420513 | -2.85671 | 4.39E-10 | 1.64E-08 |
| CLDN9     | 0.134419 | 1.299094 | 3.272695 | 1.78E-05 | 8.06E-05 |
| AC019117  | 0.205701 | 1.370549 | 2.736133 | 0.000263 | 0.000799 |
| RN7SL233  | 0.124039 | 0.574202 | 2.210768 | 9.45E-06 | 4.77E-05 |
| MTND4P2   | 0.046797 | 0.252929 | 2.434244 | 2.81E-09 | 6.53E-08 |
| PGR       | 0.841656 | 0.259352 | -1.69832 | 0.000622 | 0.001667 |
| AC012531  | 0.006864 | 0.437603 | 5.994455 | 1.47E-06 | 1.00E-05 |
| ATP6V1G2  | 0.932586 | 0.294    | -1.66542 | 0.003338 | 0.007137 |
| AC023302  | 0.081037 | 0.241178 | 1.573438 | 0.000146 | 0.000481 |
| AC253536  | 0.173673 | 1.167514 | 2.748996 | 0.014426 | 0.025319 |
| MSL3P1    | 0.167754 | 0.482891 | 1.525348 | 3.18E-06 | 1.90E-05 |
| ATP6V0D2  | 0.205947 | 0.651412 | 1.661297 | 7.71E-05 | 0.000278 |
| LINC0183  | 0.302655 | 1.168236 | 1.948583 | 1.25E-06 | 8.78E-06 |
| AL354993  | 0.100994 | 0.911075 | 3.173303 | 4.91E-05 | 0.000191 |
| AC004264  | 0.188759 | 0.916168 | 2.279068 | 7.02E-10 | 2.31E-08 |
| AC127024  | 0.11632  | 0.384822 | 1.726089 | 2.32E-08 | 3.44E-07 |
| FAM86GP   | 0.136402 | 0.433921 | 1.669571 | 3.48E-05 | 0.000143 |
| ACAP2-IT  | 0.216164 | 0.612918 | 1.503565 | 1.56E-06 | 1.05E-05 |
| AC022080  | 0.067745 | 0.219037 | 1.692977 | 0.000662 | 0.001761 |
| BBIP1P1   | 0.105754 | 0.354155 | 1.743666 | 2.89E-05 | 0.000122 |
| DUXAP8    | 0.040162 | 0.54918  | 3.773376 | 1.07E-10 | 6.36E-09 |
| COX6B2    | 0.043632 | 0.547041 | 3.648202 | 6.21E-09 | 1.22E-07 |
| KRTAP5-1  | 0.226447 | 0.821286 | 1.85871  | 2.14E-07 | 2.06E-06 |
| RNU6-19F  | 0.061231 | 0.221375 | 1.854164 | 0.001008 | 0.002537 |
| FAM3B     | 21.75096 | 7.650915 | -1.50737 | 0.001    | 0.002519 |
| TBC1D30   | 0.685979 | 2.116326 | 1.625325 | 2.46E-08 | 3.59E-07 |
| MIR181A2  | 0.037853 | 0.243271 | 2.684097 | 9.51E-05 | 0.000333 |
| C2CD4A    | 0.923466 | 5.835445 | 2.659712 | 3.22E-06 | 1.92E-05 |
| PRR7-AS1  | 0.157435 | 0.65118  | 2.048296 | 5.95E-10 | 2.03E-08 |

|          |          |          |          |          |          |
|----------|----------|----------|----------|----------|----------|
| P2RY1    | 1.933146 | 0.642721 | -1.58869 | 0.013636 | 0.0241   |
| TTLL2    | 0.039688 | 0.222697 | 2.488325 | 1.27E-05 | 6.11E-05 |
| MIR3648- | 0.07654  | 0.438571 | 2.518524 | 0.015063 | 0.026271 |
| RPL36P16 | 0.109842 | 0.497916 | 2.180477 | 2.44E-07 | 2.28E-06 |
| RNU6-547 | 0.186959 | 0.655939 | 1.810839 | 2.13E-05 | 9.41E-05 |
| COCH     | 0.378837 | 1.969397 | 2.378105 | 0.000183 | 0.000582 |
| LINC0208 | 0.079162 | 0.436375 | 2.462689 | 6.83E-08 | 8.18E-07 |
| EIF1P4   | 0.072782 | 0.221486 | 1.605569 | 0.005769 | 0.011478 |
| MIR554   | 0.171476 | 0.950474 | 2.470637 | 5.62E-07 | 4.51E-06 |
| AC020656 | 0.253162 | 1.63077  | 2.68742  | 1.21E-06 | 8.53E-06 |
| ZNF469   | 0.335447 | 1.769015 | 2.398791 | 9.57E-11 | 5.99E-09 |
| AC010536 | 0.081951 | 0.255931 | 1.64292  | 1.77E-08 | 2.76E-07 |
| AL606489 | 0.07253  | 0.295524 | 2.026627 | 9.01E-06 | 4.58E-05 |
| AC007639 | 0.096754 | 0.384035 | 1.988852 | 5.05E-07 | 4.14E-06 |
| ARHGEF2  | 7.511462 | 2.293838 | -1.71133 | 0.000391 | 0.001118 |
| DBF4     | 1.645681 | 5.628122 | 1.773969 | 1.45E-11 | 2.41E-09 |
| LRRC37A6 | 0.133484 | 0.39014  | 1.547327 | 0.002771 | 0.006078 |
| DCDC2    | 0.154209 | 1.271299 | 3.04335  | 0.000121 | 0.000408 |
| AL162727 | 0.071476 | 0.347506 | 2.281509 | 1.52E-08 | 2.44E-07 |
| AC020922 | 0.117829 | 0.424675 | 1.849665 | 7.88E-07 | 5.99E-06 |
| METTL24  | 4.908335 | 1.211123 | -2.01889 | 2.72E-05 | 0.000116 |
| TRPM2    | 0.963127 | 2.868329 | 1.574412 | 1.46E-08 | 2.36E-07 |
| MIR4312  | 0.126338 | 0.553476 | 2.131233 | 4.14E-05 | 0.000166 |
| PGM5P4   | 2.810631 | 0.741841 | -1.92171 | 1.67E-05 | 7.65E-05 |
| RNU6-64  | 0.081713 | 0.36171  | 2.146194 | 0.001893 | 0.004374 |
| AC026356 | 0.172856 | 0.544969 | 1.656603 | 4.79E-08 | 6.17E-07 |
| EMP1     | 139.7881 | 18.19776 | -2.94141 | 0.025255 | 0.041127 |
| CENPK    | 0.833244 | 2.574217 | 1.627322 | 3.00E-09 | 6.87E-08 |
| SH3BGR   | 7.43124  | 1.80416  | -2.04228 | 3.29E-05 | 0.000136 |
| AP000943 | 0.120889 | 0.432668 | 1.839571 | 4.01E-06 | 2.33E-05 |
| RNU6-30  | 0.054851 | 0.366312 | 2.739483 | 1.12E-05 | 5.51E-05 |
| RPL7AP28 | 0.598739 | 0.175114 | -1.77363 | 0.000174 | 0.000558 |
| HOXC-AS  | 0.054559 | 0.53736  | 3.299998 | 2.09E-11 | 2.71E-09 |
| RNU4-38  | 0.077638 | 0.564938 | 2.863249 | 1.79E-05 | 8.12E-05 |
| AC091588 | 0.164975 | 0.653132 | 1.985132 | 3.45E-06 | 2.04E-05 |
| AL139246 | 0.076804 | 0.246649 | 1.683211 | 1.54E-05 | 7.15E-05 |
| LINC0191 | 0.031259 | 0.418947 | 3.744411 | 9.83E-11 | 6.05E-09 |
| AC022973 | 0.082966 | 0.292714 | 1.818904 | 1.57E-07 | 1.61E-06 |
| AC021739 | 0.073853 | 0.23133  | 1.647218 | 1.18E-05 | 5.73E-05 |
| AC016526 | 0.075262 | 0.282044 | 1.905916 | 5.44E-06 | 3.02E-05 |
| KCNS1    | 0.033918 | 0.253979 | 2.904593 | 0.007042 | 0.013627 |
| ASCL5    | 0.063123 | 0.260281 | 2.043844 | 0.000152 | 0.000499 |
| VTRNA1-3 | 1.709935 | 0.537699 | -1.66907 | 0.018833 | 0.031871 |
| ACTBL2   | 0.055893 | 0.226835 | 2.02091  | 2.52E-06 | 1.58E-05 |
| R3HDML   | 0.032939 | 0.333019 | 3.337752 | 2.58E-08 | 3.74E-07 |
| MAGEA1   | 0.010208 | 2.107425 | 7.689617 | 0.007988 | 0.015198 |
| GAPDHP6  | 0.044928 | 0.217165 | 2.273103 | 1.96E-09 | 4.94E-08 |
| CCDC162  | 0.059198 | 0.405553 | 2.776268 | 3.96E-07 | 3.39E-06 |
| IQCH     | 0.138671 | 0.412964 | 1.57435  | 3.25E-06 | 1.94E-05 |
| AC026740 | 0.358714 | 1.603537 | 2.16035  | 3.51E-08 | 4.81E-07 |
| RNU6-23  | 0.218199 | 0.840026 | 1.944788 | 2.96E-05 | 0.000124 |
| AC073333 | 0.171409 | 0.62734  | 1.871808 | 3.57E-10 | 1.40E-08 |
| AC015660 | 0.075456 | 0.306599 | 2.022649 | 0.007513 | 0.014416 |
| AL035461 | 0.61719  | 2.237496 | 1.858098 | 5.99E-09 | 1.18E-07 |
| SNORC    | 0.803951 | 3.022677 | 1.910647 | 1.40E-05 | 6.61E-05 |
| ARC      | 8.593914 | 0.794916 | -3.43444 | 7.67E-05 | 0.000277 |
| AC004009 | 0.079818 | 0.309921 | 1.957114 | 0.015113 | 0.02635  |
| LINC0123 | 0.024922 | 0.968801 | 5.280685 | 6.84E-09 | 1.31E-07 |

|            |          |          |          |          |          |
|------------|----------|----------|----------|----------|----------|
| AKR1B10P   | 4.745367 | 0.673053 | -2.81773 | 0.00022  | 0.000682 |
| HMGA2      | 0.062111 | 1.619224 | 4.704305 | 1.94E-10 | 9.26E-09 |
| ELFN1-AS   | 0.737229 | 5.243797 | 2.830427 | 1.90E-06 | 1.24E-05 |
| FANCB      | 0.189997 | 0.810601 | 2.093018 | 1.40E-11 | 2.41E-09 |
| MACC1      | 2.771387 | 8.7238   | 1.654348 | 1.93E-07 | 1.91E-06 |
| GSN        | 116.4378 | 39.50002 | -1.55963 | 5.50E-09 | 1.11E-07 |
| SLC22A20   | 0.147672 | 0.425565 | 1.526986 | 0.00065  | 0.001732 |
| AC211476   | 0.132423 | 0.391605 | 1.564245 | 3.32E-07 | 2.95E-06 |
| IGHVIII-67 | 4.556258 | 0.688012 | -2.72734 | 0.022162 | 0.036743 |
| DEPDC1     | 1.034378 | 3.576599 | 1.789824 | 6.25E-09 | 1.22E-07 |
| URB2       | 1.349014 | 3.909378 | 1.535034 | 3.38E-12 | 1.40E-09 |
| CACNA1E    | 0.031906 | 0.317101 | 3.313027 | 2.45E-05 | 0.000106 |
| LDHAL6B    | 0.079323 | 0.230571 | 1.539407 | 1.08E-06 | 7.80E-06 |
| AC023043   | 0.483574 | 1.547185 | 1.677837 | 3.86E-08 | 5.19E-07 |
| ASPHD1     | 2.31     | 7.88314  | 1.770877 | 0.000137 | 0.000455 |
| NR6A1      | 0.360443 | 1.111653 | 1.624864 | 1.61E-07 | 1.65E-06 |
| OLFML2B    | 4.225746 | 14.32205 | 1.76096  | 4.79E-08 | 6.17E-07 |
| AC090772   | 0.08091  | 0.248879 | 1.621052 | 1.51E-05 | 7.03E-05 |
| C6orf223   | 0.362594 | 3.795019 | 3.387681 | 1.20E-07 | 1.29E-06 |
| SLC12A8    | 1.509231 | 4.408204 | 1.546377 | 1.14E-10 | 6.59E-09 |
| SLC19A3    | 0.83072  | 3.20653  | 1.948578 | 0.005858 | 0.011617 |
| GIF        | 240.7957 | 11.15939 | -4.43148 | 0.022474 | 0.037186 |
| GIP        | 25.6534  | 0.605382 | -5.40516 | 0.000163 | 0.000526 |
| APLN       | 0.466807 | 3.148749 | 2.75388  | 2.41E-09 | 5.81E-08 |
| PRSS41     | 0.099308 | 0.798648 | 3.00758  | 0.00116  | 0.002868 |
| C11orf96   | 84.07809 | 28.1814  | -1.57699 | 0.003262 | 0.006995 |
| SYT13      | 2.498214 | 12.25196 | 2.294043 | 0.000112 | 0.000382 |
| AP005271   | 0.040616 | 0.283886 | 2.805205 | 0.018227 | 0.030985 |
| LIF        | 1.508628 | 7.601252 | 2.333    | 2.23E-10 | 1.02E-08 |
| AP000553   | 0.066088 | 0.219921 | 1.734517 | 0.000202 | 0.000635 |
| RN7SKP1E   | 0.075854 | 0.225588 | 1.572384 | 5.50E-05 | 0.00021  |
| AC093458   | 0.066678 | 0.213048 | 1.675907 | 0.002023 | 0.004631 |
| CACNB2     | 2.862834 | 0.895698 | -1.67636 | 0.011841 | 0.021302 |
| ZIC2       | 0.210243 | 2.589844 | 3.622737 | 2.69E-05 | 0.000115 |
| AC068587   | 0.723334 | 2.110497 | 1.544849 | 0.007222 | 0.013923 |
| AC090181   | 0.192074 | 0.599152 | 1.641259 | 4.25E-07 | 3.59E-06 |
| WASIR2     | 0.105758 | 0.34207  | 1.693518 | 0.000215 | 0.000668 |
| AL353807   | 0.435629 | 1.591361 | 1.86909  | 3.68E-08 | 4.99E-07 |
| NFE2L3     | 4.780891 | 18.10456 | 1.921002 | 2.08E-11 | 2.71E-09 |
| ATP6V1B1   | 0.108152 | 0.738969 | 2.772458 | 1.26E-05 | 6.09E-05 |
| AC104564   | 0.070887 | 0.222898 | 1.652799 | 5.03E-06 | 2.82E-05 |
| ASPA       | 1.342537 | 0.352711 | -1.9284  | 1.60E-09 | 4.25E-08 |
| FANCD2     | 0.821007 | 2.763791 | 1.751182 | 1.49E-10 | 7.84E-09 |
| SCUBE1     | 2.166236 | 0.696114 | -1.63779 | 4.92E-05 | 0.000191 |
| SLC28A1    | 1.648175 | 0.095664 | -4.10675 | 0.003945 | 0.008263 |
| LINC0232   | 0.104635 | 0.557012 | 2.412347 | 2.19E-06 | 1.40E-05 |
| CHRM2      | 4.844908 | 0.926727 | -2.38625 | 0.000753 | 0.00197  |
| PPP1R1A    | 11.46719 | 1.034345 | -3.47072 | 4.30E-07 | 3.62E-06 |
| Z94721.1   | 0.318215 | 1.05852  | 1.733976 | 8.73E-09 | 1.60E-07 |
| MIR6739    | 0.496841 | 1.57642  | 1.665795 | 2.20E-06 | 1.40E-05 |
| HNRNPA3    | 0.138754 | 0.512017 | 1.883665 | 4.88E-10 | 1.76E-08 |
| RN7SL442   | 0.057805 | 0.212651 | 1.879219 | 0.025337 | 0.04125  |
| RNA5SP1C   | 0.162173 | 0.501103 | 1.627574 | 0.000217 | 0.000675 |
| ALG1L3P    | 0.032357 | 0.297828 | 3.202313 | 1.09E-05 | 5.38E-05 |
| IGKV1OR2   | 5.01171  | 0.636195 | -2.97776 | 0.014325 | 0.025168 |
| CASC9      | 0.465332 | 3.544292 | 2.929164 | 1.57E-06 | 1.06E-05 |
| MIR624     | 0.057369 | 0.292602 | 2.350594 | 0.002375 | 0.005318 |
| AL136980   | 0.065573 | 0.233926 | 1.834886 | 4.76E-05 | 0.000186 |

|           |          |          |          |          |          |
|-----------|----------|----------|----------|----------|----------|
| AL451050  | 0.195044 | 0.659053 | 1.756594 | 5.08E-09 | 1.04E-07 |
| AL049612  | 0.088176 | 0.31829  | 1.851889 | 0.013975 | 0.024626 |
| AC097493  | 0.162355 | 0.594916 | 1.873534 | 1.10E-05 | 5.40E-05 |
| APOC1     | 8.096319 | 39.32638 | 2.280159 | 2.83E-08 | 4.02E-07 |
| KRTAP4-1  | 0.004945 | 0.588311 | 6.894366 | 2.36E-06 | 1.49E-05 |
| MMP13     | 0.031622 | 0.854844 | 4.75666  | 5.91E-09 | 1.18E-07 |
| SNORA1B   | 0.13817  | 0.460443 | 1.736576 | 0.000272 | 0.000821 |
| RECQL4    | 2.291267 | 9.578913 | 2.063717 | 1.71E-10 | 8.37E-09 |
| AC092535  | 0.56557  | 2.032593 | 1.845545 | 1.91E-06 | 1.25E-05 |
| ERBB2     | 16.21466 | 61.58727 | 1.925333 | 0.00815  | 0.015469 |
| KLF2P1    | 0.011525 | 0.65945  | 5.838417 | 7.76E-08 | 9.08E-07 |
| C5orf66-A | 9.342769 | 1.04896  | -3.15489 | 5.19E-09 | 1.06E-07 |
| GJB4      | 0.256617 | 1.398048 | 2.445728 | 5.84E-06 | 3.20E-05 |
| FOXC1     | 2.731533 | 8.950558 | 1.712266 | 8.08E-06 | 4.18E-05 |
| GAS8-AS1  | 0.118716 | 0.396494 | 1.739778 | 6.55E-06 | 3.51E-05 |
| IGLV8OR8  | 1.23666  | 0.178331 | -2.79382 | 0.027718 | 0.044596 |
| AC226118  | 0.080264 | 0.381575 | 2.249141 | 0.005073 | 0.010263 |
| ZNF525    | 0.548155 | 1.621459 | 1.564635 | 1.61E-07 | 1.65E-06 |
| EME1      | 0.308283 | 1.429965 | 2.213651 | 2.33E-11 | 2.88E-09 |
| LINC0094  | 0.124459 | 1.410855 | 3.502828 | 1.27E-06 | 8.87E-06 |
| LINC0141  | 0.005819 | 0.335265 | 5.848323 | 0.002575 | 0.005708 |
| SKA1      | 1.049555 | 3.82171  | 1.86444  | 1.20E-09 | 3.43E-08 |
| WASHC5    | 0.076006 | 0.373843 | 2.29824  | 7.07E-10 | 2.32E-08 |
| AC124947  | 0.347583 | 1.491404 | 2.101243 | 1.08E-07 | 1.19E-06 |
| GINS4     | 0.475929 | 1.600555 | 1.749754 | 3.60E-10 | 1.40E-08 |
| AL034550  | 0.198829 | 0.773335 | 1.959567 | 4.19E-09 | 8.91E-08 |
| GAPLINC   | 0.15826  | 0.689193 | 2.122613 | 8.67E-10 | 2.70E-08 |
| AL606490  | 0.064824 | 0.222642 | 1.780116 | 0.001506 | 0.003592 |
| PLIN4     | 23.15584 | 4.47899  | -2.37013 | 1.24E-06 | 8.69E-06 |
| FKBP10    | 6.546421 | 37.73252 | 2.52703  | 2.06E-07 | 2.01E-06 |
| CDH3      | 2.877836 | 8.76555  | 1.60686  | 5.45E-07 | 4.40E-06 |
| CHRNA1    | 0.047674 | 0.480166 | 3.332262 | 3.91E-11 | 3.62E-09 |
| RNA5SP3C  | 0.069834 | 0.242423 | 1.795519 | 0.001378 | 0.003329 |
| CLCN5     | 0.894835 | 2.549735 | 1.510653 | 3.42E-09 | 7.54E-08 |
| KCNC3     | 0.348005 | 1.254002 | 1.84936  | 1.21E-07 | 1.31E-06 |
| OVOL3     | 0.077296 | 0.265563 | 1.780592 | 2.43E-06 | 1.53E-05 |
| AC004801  | 0.172791 | 0.63046  | 1.86738  | 3.07E-08 | 4.31E-07 |
| LINC0116  | 0.18793  | 0.60317  | 1.682371 | 0.011941 | 0.021462 |
| NXPH4     | 0.426795 | 3.391684 | 2.990386 | 1.70E-05 | 7.79E-05 |
| DES       | 1352.684 | 426.9645 | -1.66364 | 5.97E-06 | 3.25E-05 |
| TMPRSS1F  | 21.02437 | 0.996664 | -4.39881 | 0.013843 | 0.024414 |
| AL139349  | 0.223822 | 0.645607 | 1.528302 | 9.76E-06 | 4.90E-05 |
| CCDC148   | 0.092322 | 0.264978 | 1.521119 | 0.00046  | 0.001286 |
| NECAB1    | 2.154687 | 0.512939 | -2.07062 | 0.000409 | 0.001162 |
| UNC93B2   | 0.06291  | 0.229089 | 1.864539 | 0.000459 | 0.001284 |
| MIR194-1  | 0.080339 | 0.320322 | 1.995344 | 0.001284 | 0.003135 |
| LINC0128  | 0.008863 | 0.394228 | 5.475114 | 0.015091 | 0.026315 |
| C1orf195  | 0.237765 | 0.788625 | 1.729804 | 1.82E-07 | 1.82E-06 |
| ULBP3     | 0.774111 | 2.2362   | 1.530437 | 6.15E-05 | 0.00023  |
| MEX3A     | 0.25489  | 2.213447 | 3.118349 | 1.47E-11 | 2.41E-09 |
| PLAU      | 5.86371  | 27.41512 | 2.225086 | 1.29E-10 | 7.14E-09 |
| CBX2      | 0.495631 | 2.788587 | 2.492197 | 7.74E-09 | 1.45E-07 |
| ADH7      | 16.20479 | 0.715961 | -4.5004  | 1.07E-08 | 1.86E-07 |
| APOC1P1   | 0.085376 | 0.390175 | 2.192216 | 3.14E-06 | 1.89E-05 |
| MIR1285   | 0.490225 | 1.417219 | 1.531546 | 0.000575 | 0.00156  |
| AP005233  | 0.360853 | 2.472484 | 2.776477 | 4.29E-07 | 3.62E-06 |
| RNU6-937  | 0.099791 | 0.485632 | 2.282877 | 0.000289 | 0.000863 |
| AC068491  | 0.041435 | 0.274311 | 2.726889 | 1.16E-10 | 6.61E-09 |

|          |          |          |          |          |          |
|----------|----------|----------|----------|----------|----------|
| CSAG1    | 0.058083 | 6.652679 | 6.839686 | 0.000208 | 0.000652 |
| AC087752 | 0.178656 | 0.51775  | 1.53507  | 4.62E-05 | 0.000182 |
| MX1-AS   | 0.284585 | 0.888463 | 1.642452 | 1.08E-06 | 7.79E-06 |
| AP002336 | 0.223472 | 0.646591 | 1.532761 | 4.22E-07 | 3.57E-06 |
| RNU6-48f | 0.134242 | 0.389881 | 1.538201 | 0.000139 | 0.00046  |
| AC100843 | 0.060316 | 0.244299 | 2.018039 | 2.09E-05 | 9.26E-05 |
| BARX1    | 67.12498 | 19.23225 | -1.80332 | 0.000564 | 0.001534 |
| TREM2    | 2.004752 | 9.404202 | 2.229882 | 4.73E-10 | 1.72E-08 |
| CYP2C18  | 18.42123 | 6.206749 | -1.56946 | 0.003889 | 0.008158 |
| AC244093 | 0.055856 | 0.262276 | 2.231292 | 1.05E-08 | 1.84E-07 |
| CEP55    | 3.078272 | 11.80918 | 1.939716 | 1.63E-10 | 8.20E-09 |
| IER5L    | 5.171814 | 16.48174 | 1.672126 | 2.87E-09 | 6.62E-08 |
| AC005162 | 0.075118 | 0.252064 | 1.746571 | 0.016189 | 0.027978 |
| CACNA1D  | 0.277392 | 1.179786 | 2.088526 | 7.45E-08 | 8.75E-07 |
| SLC9A4   | 9.183814 | 1.946467 | -2.23824 | 0.000934 | 0.002377 |
| AL359636 | 0.073777 | 0.286904 | 1.959336 | 0.002157 | 0.004899 |
| TCEAL5   | 0.549377 | 0.174998 | -1.65046 | 1.60E-06 | 1.08E-05 |
| MAP6     | 2.668562 | 0.884037 | -1.59388 | 0.000247 | 0.000755 |
| ARHGAP3  | 1.744366 | 5.287523 | 1.599889 | 2.94E-10 | 1.22E-08 |
| FGF19    | 0.009225 | 2.492638 | 8.077888 | 1.25E-07 | 1.34E-06 |
| AC012254 | 0.054562 | 0.258416 | 2.243725 | 0.000452 | 0.001268 |
| HMG2P2   | 0.119457 | 0.373858 | 1.646    | 1.51E-06 | 1.02E-05 |
| PRSS56   | 0.004493 | 0.713272 | 7.310767 | 0.001372 | 0.003316 |
| AC078778 | 0.211731 | 0.822364 | 1.957548 | 2.68E-08 | 3.85E-07 |
| BGN      | 47.80769 | 234.5953 | 2.29486  | 5.31E-11 | 4.26E-09 |
| ELOVL4   | 2.352988 | 0.579375 | -2.02193 | 0.007432 | 0.014277 |
| MIR1972- | 0.276691 | 0.935455 | 1.757391 | 8.42E-05 | 0.0003   |
| AP001065 | 0.047235 | 0.230451 | 2.28652  | 0.000244 | 0.000747 |
| MIR4783  | 0.064397 | 0.293673 | 2.189135 | 0.008962 | 0.016777 |
| AC093520 | 0.089045 | 0.35007  | 1.975043 | 9.88E-07 | 7.26E-06 |
| COL9A1   | 0.196207 | 0.899961 | 2.197483 | 0.000281 | 0.000842 |
| HSPB3    | 1.477387 | 0.240902 | -2.61653 | 9.35E-05 | 0.000328 |
| PODXL2   | 8.264187 | 23.47033 | 1.505893 | 0.000132 | 0.00044  |
| RF02141  | 0.051625 | 0.753071 | 3.866654 | 2.07E-07 | 2.01E-06 |
| ADAMTSL  | 1.741388 | 0.567718 | -1.61699 | 1.05E-07 | 1.17E-06 |
| AC012254 | 0.093741 | 0.306298 | 1.708184 | 0.004266 | 0.008836 |
| COL22A1  | 0.11575  | 1.218327 | 3.395821 | 2.40E-08 | 3.51E-07 |
| RNU6-757 | 0.177484 | 0.529075 | 1.575785 | 0.001745 | 0.004071 |
| AL158839 | 0.076679 | 0.322038 | 2.070325 | 0.010695 | 0.019523 |
| AC002128 | 0.270937 | 0.848813 | 1.64749  | 1.87E-07 | 1.86E-06 |
| NCAM1    | 4.924092 | 0.988486 | -2.31657 | 3.47E-07 | 3.04E-06 |
| MORN3    | 0.178029 | 0.602716 | 1.75937  | 0.003496 | 0.007441 |
| CST1     | 3.052795 | 91.62547 | 4.907546 | 2.74E-12 | 1.40E-09 |
| OTOP3    | 10.40855 | 0.482043 | -4.43246 | 0.000361 | 0.001042 |
| LOXL2    | 4.616483 | 13.10606 | 1.505368 | 3.23E-09 | 7.25E-08 |
| LEFTY1   | 0.240377 | 6.431912 | 4.741878 | 0.00359  | 0.007613 |
| CYP24A1  | 0.04541  | 0.928539 | 4.353869 | 0.002347 | 0.005262 |
| TNFSF15  | 1.0076   | 3.098271 | 1.62054  | 1.61E-07 | 1.65E-06 |
| NARF-AS1 | 0.068569 | 0.235545 | 1.780381 | 1.08E-07 | 1.19E-06 |
| HOXC-AS1 | 0.028789 | 0.342614 | 3.572973 | 4.74E-09 | 9.80E-08 |
| PKMYT1   | 1.617563 | 5.409506 | 1.741675 | 1.80E-09 | 4.63E-08 |
| FSCN1    | 9.77752  | 30.4042  | 1.63673  | 1.81E-06 | 1.20E-05 |
| MCTS2P   | 1.110028 | 3.482409 | 1.64949  | 7.69E-10 | 2.48E-08 |
| AC107308 | 0        | 0.28733  | Inf      | 2.70E-08 | 3.88E-07 |
| AC024361 | 0.120708 | 0.384273 | 1.670614 | 3.97E-05 | 0.00016  |
| AL138760 | 0.074301 | 0.218995 | 1.559448 | 0.004256 | 0.008822 |
| MYH11    | 600.8356 | 134.134  | -2.1633  | 8.83E-06 | 4.50E-05 |
| TRIM71   | 0.007174 | 0.236837 | 5.045006 | 0.002017 | 0.00462  |

|          |          |          |          |          |          |
|----------|----------|----------|----------|----------|----------|
| AC006042 | 0.570543 | 2.528542 | 2.147899 | 1.77E-08 | 2.76E-07 |
| AC011825 | 0.109522 | 0.320178 | 1.547653 | 1.94E-06 | 1.26E-05 |
| AC007249 | 0.143271 | 0.48009  | 1.744553 | 3.36E-05 | 0.000138 |
| DLG2     | 0.545494 | 0.183177 | -1.57433 | 0.001204 | 0.002959 |
| AL356215 | 0.071537 | 0.297919 | 2.05815  | 0.001815 | 0.004217 |
| DKK2     | 0.312159 | 0.965653 | 1.629225 | 2.16E-05 | 9.51E-05 |
| NOX1     | 0.223876 | 4.702112 | 4.392538 | 1.38E-07 | 1.45E-06 |
| SEMG2    | 0.020346 | 0.291279 | 3.839565 | 0.00804  | 0.01528  |
| AL080317 | 0.916463 | 2.600833 | 1.504826 | 1.46E-09 | 3.96E-08 |
| AC011447 | 0.434522 | 1.807089 | 2.056165 | 0.001245 | 0.003048 |
| RDH8     | 0.010472 | 0.493545 | 5.558543 | 6.89E-08 | 8.22E-07 |
| HOXB-AS  | 0.304176 | 1.685206 | 2.469948 | 6.53E-08 | 7.89E-07 |
| AC106028 | 0.102665 | 0.330243 | 1.685582 | 2.93E-07 | 2.65E-06 |
| CTD-2201 | 0.106795 | 0.337755 | 1.661129 | 5.31E-05 | 0.000204 |
| IGKV2OR2 | 16.79962 | 1.981209 | -3.08398 | 0.018316 | 0.031107 |
| MMP1     | 24.08508 | 73.51541 | 1.609907 | 4.67E-05 | 0.000183 |
| RPL23AP5 | 0.139193 | 0.434482 | 1.642211 | 3.13E-08 | 4.39E-07 |
| AP000345 | 0.061189 | 0.214937 | 1.812581 | 0.000626 | 0.001676 |
| EZH2     | 2.105213 | 6.223342 | 1.563723 | 1.34E-09 | 3.71E-08 |
| RDH16    | 0.071697 | 0.295711 | 2.044214 | 4.09E-05 | 0.000164 |
| BARX1-D1 | 1.222905 | 0.405905 | -1.5911  | 0.001809 | 0.004205 |
| AC131097 | 0.035375 | 0.45234  | 3.676614 | 1.66E-08 | 2.62E-07 |
| AL356299 | 0.08535  | 0.462244 | 2.437185 | 1.01E-09 | 2.99E-08 |
| AC073592 | 0.044786 | 0.251823 | 2.491283 | 0.000132 | 0.000441 |
| AL592295 | 0.11447  | 0.418826 | 1.871376 | 1.81E-05 | 8.17E-05 |
| PRR20G   | 0.020283 | 0.956685 | 5.559735 | 0.00553  | 0.011067 |
| C6orf15  | 0.019406 | 2.288063 | 6.881453 | 0.000259 | 0.000786 |
| AC083906 | 0.042132 | 0.273139 | 2.696652 | 2.90E-06 | 1.77E-05 |
| ADAMTS2  | 2.005901 | 10.71008 | 2.416647 | 5.06E-11 | 4.13E-09 |
| MEST     | 2.768328 | 13.16557 | 2.249684 | 1.25E-10 | 6.96E-09 |
| AC053503 | 2.656956 | 0.718069 | -1.88758 | 0.000647 | 0.001727 |
| RPL7P57  | 0.069712 | 0.25302  | 1.859764 | 4.07E-08 | 5.43E-07 |
| MIR581   | 0.135426 | 0.490165 | 1.855767 | 0.001793 | 0.004171 |
| SETP5    | 0.084404 | 0.262959 | 1.639455 | 5.63E-06 | 3.11E-05 |
| CKMT2    | 3.366966 | 0.674179 | -2.32025 | 1.67E-08 | 2.63E-07 |
| REEP2    | 4.255688 | 1.498325 | -1.50604 | 0.001387 | 0.003345 |
| JPH2     | 13.47813 | 4.110679 | -1.71317 | 0.000303 | 0.000898 |
| HOXC8    | 0.078109 | 1.613647 | 4.36869  | 1.15E-11 | 2.25E-09 |
| SYCP2    | 0.226439 | 0.742519 | 1.713304 | 0.029601 | 0.047167 |
| DENND2C  | 2.506303 | 0.544176 | -2.20342 | 0.014766 | 0.025828 |
| ELFN2    | 0.033427 | 0.288786 | 3.110902 | 0.000161 | 0.000521 |
| ANGPTL7  | 2.138054 | 0.414511 | -2.36682 | 6.54E-05 | 0.000242 |
| ECEL1    | 0.25696  | 1.343092 | 2.385944 | 4.65E-05 | 0.000182 |
| COL1A1   | 71.6203  | 465.2526 | 2.699574 | 1.02E-11 | 2.17E-09 |
| AC007272 | 0.120129 | 0.35011  | 1.543222 | 2.29E-05 | 1.00E-04 |
| AC079062 | 0.036292 | 0.443782 | 3.612127 | 0.003736 | 0.007884 |
| RPLPOP2  | 0.301639 | 1.436044 | 2.251204 | 8.98E-11 | 5.79E-09 |
| RNU6-82F | 0.07475  | 0.230946 | 1.627406 | 0.003644 | 0.007714 |
| AP003555 | 0.300086 | 1.592494 | 2.40784  | 3.66E-08 | 4.96E-07 |
| HLF      | 6.43527  | 1.145688 | -2.48979 | 2.78E-05 | 0.000118 |
| AC093732 | 0.145802 | 0.543934 | 1.899423 | 3.93E-06 | 2.29E-05 |
| TSPEAR-A | 0.187183 | 0.783674 | 2.065802 | 6.25E-05 | 0.000233 |
| HBB      | 118.5418 | 23.74398 | -2.31976 | 1.85E-08 | 2.85E-07 |
| MSX2     | 2.184333 | 8.028121 | 1.877869 | 1.28E-05 | 6.16E-05 |
| HAVCR1   | 0.049423 | 1.212864 | 4.617095 | 1.85E-05 | 8.36E-05 |
| RNU6-112 | 0.156135 | 0.496142 | 1.66796  | 0.001055 | 0.002641 |
| TEX19    | 0.007801 | 0.266461 | 5.09418  | 5.74E-06 | 3.16E-05 |
| SUMO1P1  | 0.022396 | 0.380267 | 4.08569  | 0.000594 | 0.001603 |



|          |          |          |          |          |          |
|----------|----------|----------|----------|----------|----------|
| PITPNM3  | 5.759929 | 1.926481 | -1.58008 | 0.000116 | 0.000395 |
| AL049836 | 0.06499  | 0.427406 | 2.717314 | 2.36E-05 | 0.000103 |
| AC012170 | 0.110612 | 0.314263 | 1.506461 | 2.33E-05 | 0.000102 |
| PKD2L1   | 0.046844 | 0.219751 | 2.22994  | 1.15E-08 | 1.97E-07 |
| AL590729 | 0.063435 | 0.287996 | 2.182705 | 6.70E-09 | 1.30E-07 |
| AC036108 | 2.979894 | 0.704696 | -2.08019 | 0.026045 | 0.042213 |
| LRRC36   | 0.084534 | 0.29629  | 1.809399 | 3.76E-05 | 0.000153 |
| MXRA5Y   | 0.146665 | 0.440031 | 1.585081 | 7.01E-05 | 0.000257 |
| JAM2     | 8.187914 | 2.779416 | -1.55871 | 4.10E-06 | 2.37E-05 |
| AL009178 | 0.131053 | 0.382651 | 1.545874 | 4.70E-06 | 2.66E-05 |
| NUSAP1   | 6.597064 | 19.30923 | 1.549394 | 4.83E-09 | 9.98E-08 |
| CD3EAP   | 0.633346 | 1.859304 | 1.553696 | 6.98E-12 | 2.00E-09 |
| FANCA    | 0.914139 | 3.015151 | 1.721745 | 7.46E-10 | 2.43E-08 |
| AC245884 | 0.065333 | 0.649982 | 3.314513 | 9.55E-06 | 4.82E-05 |
| AC018695 | 0.177424 | 0.507897 | 1.517337 | 5.63E-08 | 7.02E-07 |
| MIR5581  | 0.358981 | 1.136925 | 1.663159 | 0.000129 | 0.000433 |
| AL353807 | 0.095169 | 0.288468 | 1.599842 | 5.90E-05 | 0.000223 |
| PSCA     | 982.5228 | 111.6379 | -3.13766 | 0.000106 | 0.000366 |
| DMD      | 5.325716 | 1.789781 | -1.57319 | 0.00339  | 0.00724  |
| NCLP1    | 0.136131 | 0.44845  | 1.719949 | 9.98E-09 | 1.78E-07 |
| AC083822 | 0.113121 | 0.324866 | 1.521978 | 0.000786 | 0.002047 |
| GHR      | 2.547057 | 0.746877 | -1.76989 | 7.35E-08 | 8.68E-07 |
| THY1     | 7.293307 | 22.49539 | 1.624984 | 4.36E-08 | 5.73E-07 |
| AC114488 | 0.493045 | 1.94762  | 1.981922 | 2.02E-07 | 1.98E-06 |
| ERMN     | 0.079834 | 0.240422 | 1.590498 | 2.32E-06 | 1.47E-05 |
| PSORS1C3 | 0.578916 | 2.812935 | 2.280651 | 3.67E-05 | 0.00015  |
| HOXC13   | 0.067277 | 1.44344  | 4.423261 | 3.26E-06 | 1.94E-05 |
| MIR181B2 | 0.119257 | 0.379048 | 1.668308 | 0.002073 | 0.004729 |
| LGI4     | 3.117143 | 0.817021 | -1.93178 | 2.40E-07 | 2.25E-06 |
| OPA1-AS1 | 0.068399 | 0.256895 | 1.909129 | 3.24E-07 | 2.89E-06 |
| AC016550 | 0.026129 | 0.312574 | 3.580478 | 0.005791 | 0.011512 |
| KRT17    | 7.009285 | 52.07617 | 2.893284 | 1.18E-05 | 5.73E-05 |
| KCNA1    | 1.180466 | 0.163806 | -2.8493  | 0.006581 | 0.012848 |
| TBC1D31  | 0.513138 | 1.504634 | 1.551993 | 8.38E-12 | 2.04E-09 |
| MIR544B  | 0.038257 | 0.296149 | 2.952515 | 8.14E-05 | 0.000292 |
| MYOSLID  | 0.08237  | 0.591213 | 2.84349  | 6.57E-06 | 3.52E-05 |
| AC079949 | 0.346315 | 1.657545 | 2.258893 | 0.01739  | 0.029752 |
| C19orf84 | 0.048697 | 0.529705 | 3.443277 | 2.63E-07 | 2.43E-06 |
| IGLJCOR1 | 3.497348 | 0.182339 | -4.26157 | 0.012955 | 0.023044 |
| AC053503 | 5.456635 | 1.286623 | -2.08442 | 2.06E-05 | 9.15E-05 |
| SNORD72  | 0.202821 | 0.878126 | 2.114223 | 1.92E-06 | 1.25E-05 |
| FAM81A   | 0.443869 | 1.800605 | 2.020275 | 5.12E-09 | 1.05E-07 |
| AC134312 | 0.050172 | 0.300932 | 2.584493 | 2.15E-08 | 3.23E-07 |
| AC067931 | 0.189112 | 0.666501 | 1.817365 | 1.18E-08 | 2.01E-07 |
| DUSP5P1  | 0.034926 | 0.213785 | 2.613799 | 5.20E-06 | 2.90E-05 |
| AL031668 | 0.073726 | 0.286321 | 1.957382 | 3.29E-07 | 2.92E-06 |
| G2E3-AS1 | 0.011763 | 0.219096 | 4.219292 | 8.63E-06 | 4.42E-05 |
| PILRB    | 0.456573 | 1.372738 | 1.588139 | 2.31E-07 | 2.18E-06 |
| NUF2     | 1.153039 | 5.010525 | 2.119521 | 7.42E-11 | 5.16E-09 |
| RNU1-12C | 0.084377 | 0.29156  | 1.788868 | 0.006067 | 0.011989 |
| KIAA1024 | 0.140489 | 0.430716 | 1.616282 | 1.54E-08 | 2.46E-07 |
| APOBEC3I | 1.640016 | 5.760311 | 1.812437 | 1.99E-06 | 1.29E-05 |
| AC116348 | 0.094553 | 0.297012 | 1.651325 | 0.007255 | 0.013982 |
| SLCO4A1  | 0.595842 | 4.537816 | 2.928997 | 3.57E-05 | 0.000146 |
| HAND2    | 22.3045  | 4.779351 | -2.22245 | 0.004227 | 0.008765 |
| SHOX2    | 0.069344 | 0.291158 | 2.06996  | 3.46E-05 | 0.000142 |
| AC025857 | 1.736745 | 5.925367 | 1.770518 | 7.80E-10 | 2.50E-08 |
| KCNK3    | 3.421023 | 1.173751 | -1.5433  | 6.24E-06 | 3.38E-05 |

|           |          |          |          |          |          |
|-----------|----------|----------|----------|----------|----------|
| AC090589  | 0.0855   | 0.261084 | 1.610524 | 0.000135 | 0.000449 |
| RNU4-21F  | 0.243361 | 0.847649 | 1.800366 | 0.000344 | 0.001001 |
| C16orf89  | 22.8135  | 2.408377 | -3.24375 | 2.18E-08 | 3.27E-07 |
| LINC0215  | 0.013023 | 0.292768 | 4.490673 | 2.59E-07 | 2.40E-06 |
| MIR302D   | 0.051739 | 0.291122 | 2.492314 | 0.000656 | 0.001748 |
| AL355388  | 0.186489 | 0.544215 | 1.545082 | 0.019108 | 0.032283 |
| TMC7      | 0.87245  | 3.274388 | 1.908082 | 1.82E-09 | 4.68E-08 |
| EIF5AP3   | 0.106799 | 0.314437 | 1.557872 | 6.47E-07 | 5.08E-06 |
| CXCL17    | 225.645  | 66.30906 | -1.76678 | 0.000638 | 0.001706 |
| PYY2      | 0.070407 | 0.473223 | 2.748737 | 4.99E-08 | 6.37E-07 |
| IGLV3-13  | 3.724188 | 0.290279 | -3.68141 | 0.010971 | 0.01997  |
| AC108693  | 0.18461  | 0.545996 | 1.564409 | 1.32E-05 | 6.30E-05 |
| AC093616  | 0.133601 | 0.447453 | 1.74381  | 1.17E-09 | 3.35E-08 |
| SMIM35    | 0.069281 | 0.364325 | 2.394685 | 3.41E-07 | 3.00E-06 |
| AC019069  | 0.268354 | 0.8989   | 1.744025 | 9.44E-09 | 1.70E-07 |
| AL353583  | 0.146665 | 0.420128 | 1.518305 | 4.49E-06 | 2.56E-05 |
| RN7SL8P   | 0.421873 | 1.235337 | 1.550022 | 0.02986  | 0.047538 |
| AC008147  | 0.727511 | 2.289479 | 1.653979 | 2.43E-07 | 2.27E-06 |
| DLX4      | 0.080281 | 0.697388 | 3.118826 | 3.43E-07 | 3.01E-06 |
| FAM72B    | 0.189296 | 0.737041 | 1.961102 | 1.80E-09 | 4.63E-08 |
| RPSAP71   | 0.061131 | 0.246845 | 2.013636 | 0.022356 | 0.037024 |
| BLM       | 0.630161 | 2.455736 | 1.962363 | 5.75E-11 | 4.42E-09 |
| C5orf58   | 0.064972 | 0.233915 | 1.848099 | 8.39E-05 | 0.000299 |
| LINC0161  | 0.261364 | 1.489229 | 2.510431 | 7.55E-09 | 1.42E-07 |
| IGF2BP3   | 0.256409 | 1.889153 | 2.88122  | 5.20E-08 | 6.57E-07 |
| AC007215  | 0.101606 | 0.287555 | 1.500847 | 8.32E-05 | 0.000297 |
| RNY1P4    | 0.102572 | 0.323224 | 1.6559   | 0.001944 | 0.004478 |
| HELLS     | 0.766587 | 3.536512 | 2.205805 | 2.71E-12 | 1.40E-09 |
| AC106772  | 0.061454 | 0.33753  | 2.457437 | 1.80E-05 | 8.15E-05 |
| AC093582  | 0.310093 | 0.965139 | 1.638038 | 8.69E-06 | 4.44E-05 |
| AL031666  | 0.093865 | 0.352683 | 1.90972  | 2.12E-08 | 3.19E-07 |
| KIF26B-AS | 0.03908  | 0.579396 | 3.890058 | 4.65E-11 | 3.96E-09 |
| AC073210  | 0.329749 | 1.105087 | 1.744719 | 7.98E-07 | 6.05E-06 |
| AC024560  | 0.267019 | 0.885793 | 1.730028 | 1.58E-08 | 2.52E-07 |
| RNU6-62F  | 0.080174 | 0.234627 | 1.549165 | 0.024744 | 0.040433 |
| CENPA     | 1.492496 | 5.131475 | 1.781646 | 2.38E-09 | 5.74E-08 |
| CENPO     | 1.038938 | 2.998862 | 1.529306 | 2.49E-11 | 2.90E-09 |
| IL11      | 0.266487 | 2.800497 | 3.393548 | 5.14E-11 | 4.19E-09 |
| MAL       | 382.5217 | 10.59947 | -5.17348 | 5.80E-12 | 1.85E-09 |
| AC018629  | 1.289448 | 3.897637 | 1.595846 | 0.012002 | 0.021551 |
| GBP5      | 1.772565 | 5.400226 | 1.607181 | 3.19E-05 | 0.000132 |
| DRGX      | 0.026983 | 0.40782  | 3.91782  | 0.000338 | 0.000987 |
| PRIMA1    | 14.13141 | 2.377932 | -2.57113 | 5.34E-08 | 6.70E-07 |
| GABRR1    | 0.016079 | 0.254769 | 3.985964 | 4.11E-05 | 0.000165 |
| PRSS51    | 0.08712  | 1.041917 | 3.58009  | 6.09E-07 | 4.81E-06 |
| FAR2P1    | 0.008552 | 0.523212 | 5.935013 | 1.81E-07 | 1.80E-06 |
| RNU4-78F  | 0.295402 | 0.881603 | 1.577451 | 6.40E-05 | 0.000238 |
| AC245100  | 0.038337 | 1.59392  | 5.377696 | 0.003674 | 0.007766 |
| PROZ      | 0.053052 | 0.237567 | 2.162853 | 2.13E-05 | 9.42E-05 |
| LINC0127  | 0.083645 | 0.344076 | 2.040374 | 1.15E-06 | 8.21E-06 |
| RPS3AP3   | 0.040201 | 0.255922 | 2.670392 | 1.70E-06 | 1.13E-05 |
| AL133215  | 0.204057 | 0.636324 | 1.640788 | 3.48E-05 | 0.000143 |
| TIMP1     | 125.996  | 413.2126 | 1.713507 | 7.92E-10 | 2.53E-08 |
| AL513123  | 0.016201 | 0.434604 | 4.745507 | 2.26E-07 | 2.15E-06 |
| MAPK4     | 2.014051 | 0.500253 | -2.00937 | 1.24E-05 | 6.00E-05 |
| AL133330  | 0.286193 | 0.921367 | 1.686789 | 0.000221 | 0.000684 |
| AC244093  | 0.192308 | 0.623115 | 1.696082 | 4.17E-07 | 3.53E-06 |
| HOXC6     | 0.374199 | 1.841171 | 2.298746 | 4.93E-08 | 6.29E-07 |

|          |          |          |          |          |          |
|----------|----------|----------|----------|----------|----------|
| AGTR1    | 2.460755 | 0.752889 | -1.70859 | 1.58E-05 | 7.31E-05 |
| SCUBE2   | 2.391397 | 0.812226 | -1.5579  | 1.50E-06 | 1.02E-05 |
| ANK1     | 0.327073 | 1.278665 | 1.966956 | 0.025886 | 0.041997 |
| MTCO3P4  | 0.047607 | 0.314876 | 2.725542 | 2.55E-09 | 6.06E-08 |
| C10orf91 | 0.139461 | 0.568369 | 2.02697  | 2.20E-05 | 9.67E-05 |
| SSC4D    | 0.173319 | 0.668981 | 1.948535 | 1.82E-08 | 2.81E-07 |
| AC016292 | 0.115043 | 0.340573 | 1.56579  | 0.001045 | 0.002619 |
| TNFRSF11 | 0.506766 | 5.18658  | 3.355391 | 1.06E-07 | 1.18E-06 |
| KRT7     | 3.152407 | 42.1481  | 3.740942 | 1.19E-05 | 5.78E-05 |
| DUXAP9   | 0.016551 | 0.222056 | 3.745917 | 2.41E-10 | 1.06E-08 |
| ADAM12   | 0.350509 | 2.456506 | 2.809082 | 1.79E-11 | 2.51E-09 |
| CSMD2    | 0.068511 | 0.25077  | 1.871954 | 3.04E-06 | 1.84E-05 |
| PLOD3    | 9.598509 | 27.16921 | 1.501091 | 2.60E-10 | 1.12E-08 |
| SEMA6D   | 3.088962 | 1.056825 | -1.54739 | 0.002859 | 0.006241 |
| AC090912 | 0.086598 | 0.256698 | 1.567667 | 8.77E-05 | 0.000311 |
| FHL1     | 112.7931 | 22.61589 | -2.31827 | 3.56E-08 | 4.87E-07 |
| AL033527 | 0.047063 | 0.21826  | 2.213383 | 8.76E-08 | 1.00E-06 |
| ADCY5    | 9.518937 | 3.18649  | -1.57883 | 0.001097 | 0.002731 |
| BRIP1    | 0.418488 | 1.540339 | 1.87999  | 1.68E-10 | 8.35E-09 |
| TMOD1    | 7.903366 | 2.060599 | -1.9394  | 1.85E-06 | 1.22E-05 |
| SNRPCP4  | 0.085716 | 0.272971 | 1.671116 | 0.00012  | 0.000406 |
| GK-IT1   | 0.317487 | 0.988498 | 1.63854  | 9.41E-07 | 6.95E-06 |
| RN7SKP2C | 0.098986 | 0.497458 | 2.329284 | 1.17E-07 | 1.27E-06 |
| KIF14    | 0.381309 | 2.333505 | 2.613465 | 3.81E-12 | 1.46E-09 |
| GAD1     | 0.04323  | 0.780508 | 4.174301 | 7.92E-10 | 2.53E-08 |
| CCNE1    | 1.38516  | 11.37574 | 3.037836 | 5.50E-09 | 1.11E-07 |
| RNF32    | 0.307553 | 0.878164 | 1.513653 | 8.17E-08 | 9.47E-07 |
| AL627230 | 0.079059 | 0.362872 | 2.19847  | 3.12E-06 | 1.88E-05 |
| AP002954 | 0.192987 | 0.546988 | 1.503004 | 0.001055 | 0.002641 |
| AL035420 | 0.069521 | 0.221455 | 1.671496 | 0.000803 | 0.002086 |
| PIMREG   | 0.858209 | 2.899594 | 1.75645  | 5.50E-09 | 1.11E-07 |
| COMP     | 0.859207 | 10.91113 | 3.66665  | 1.68E-06 | 1.12E-05 |
| OTX1     | 0.359169 | 1.847771 | 2.363053 | 2.60E-10 | 1.12E-08 |
| RBPMS2   | 41.60266 | 9.280238 | -2.16444 | 5.97E-06 | 3.25E-05 |
| AL133373 | 0.105991 | 0.399157 | 1.913014 | 7.75E-05 | 0.000279 |
| PCLAF    | 2.861725 | 8.871945 | 1.632365 | 6.91E-09 | 1.32E-07 |
| AC010761 | 0.325478 | 0.934043 | 1.520928 | 2.93E-06 | 1.78E-05 |
| TMSB15A  | 0.173222 | 0.632444 | 1.868316 | 3.43E-07 | 3.01E-06 |
| ARID3A   | 1.809928 | 6.085069 | 1.749341 | 0.000102 | 0.000354 |
| GAPDHP3  | 0.06431  | 0.212654 | 1.725393 | 2.05E-07 | 2.00E-06 |
| RSPO2    | 2.374383 | 0.530708 | -2.16156 | 1.96E-07 | 1.92E-06 |
| CCDC78   | 0.157151 | 0.489283 | 1.638517 | 1.88E-06 | 1.23E-05 |
| SERPINE1 | 8.532432 | 37.97013 | 2.153836 | 1.63E-07 | 1.66E-06 |
| SLC28A3  | 0.585203 | 2.476084 | 2.081052 | 2.99E-05 | 0.000125 |
| AC008521 | 0.171745 | 0.646942 | 1.913367 | 4.06E-05 | 0.000163 |
| AC092953 | 0.102178 | 0.30649  | 1.584762 | 0.000302 | 0.000896 |
| RNU7-12f | 0.103797 | 0.416984 | 2.006229 | 0.001596 | 0.003772 |
| UBE2QL1  | 1.464955 | 0.437195 | -1.74451 | 3.75E-07 | 3.23E-06 |
| MTFR2    | 0.736117 | 2.973051 | 2.013937 | 1.58E-10 | 8.08E-09 |
| HENMT1   | 1.453286 | 4.825091 | 1.731238 | 1.65E-08 | 2.61E-07 |
| LINC0159 | 0.038654 | 0.28742  | 2.89446  | 0.000446 | 0.001252 |
| CDK1     | 3.64179  | 13.21298 | 1.859237 | 6.81E-10 | 2.26E-08 |
| RNU6-12c | 0.089424 | 0.274157 | 1.616273 | 0.009305 | 0.017345 |
| IGKV1-37 | 1.19092  | 0.138424 | -3.10491 | 0.01293  | 0.023003 |
| MET      | 4.709488 | 24.7771  | 2.395365 | 5.94E-11 | 4.49E-09 |
| AP001107 | 2.709791 | 0.397431 | -2.7694  | 2.80E-07 | 2.55E-06 |
| LONRF2   | 1.737046 | 0.546237 | -1.66904 | 0.000428 | 0.001209 |
| GSTM1    | 13.73754 | 4.584922 | -1.58315 | 0.010048 | 0.018521 |

|           |          |          |          |          |          |
|-----------|----------|----------|----------|----------|----------|
| CKS1BP3   | 0.145322 | 0.508048 | 1.805714 | 3.39E-07 | 2.99E-06 |
| AC093702  | 0.909446 | 0.233446 | -1.9619  | 0.006228 | 0.012258 |
| BUB1      | 1.745675 | 7.101148 | 2.024267 | 2.00E-10 | 9.43E-09 |
| WT1       | 0.036504 | 0.279816 | 2.938374 | 5.44E-05 | 0.000208 |
| SST       | 112.1308 | 35.07082 | -1.67684 | 5.15E-05 | 0.000199 |
| FAM19A5   | 0.809813 | 2.514793 | 1.63478  | 3.09E-05 | 0.000129 |
| AC006449  | 0.077985 | 0.286377 | 1.876658 | 2.28E-07 | 2.16E-06 |
| DNA2      | 0.586243 | 2.51547  | 2.101258 | 1.23E-11 | 2.34E-09 |
| AC099489  | 0.071309 | 0.224771 | 1.656293 | 0.000173 | 0.000553 |
| KLF15     | 5.457345 | 1.612599 | -1.75881 | 2.31E-07 | 2.18E-06 |
| GRIN3B    | 0.087565 | 0.36883  | 2.074529 | 0.001582 | 0.003744 |
| CNTD2     | 0.198598 | 1.293212 | 2.703033 | 3.16E-06 | 1.90E-05 |
| RF00405   | 0.236235 | 0.70243  | 1.57213  | 0.000606 | 0.00163  |
| CHI3L1    | 2.329014 | 13.86624 | 2.573786 | 6.40E-07 | 5.02E-06 |
| RBL1      | 1.339955 | 3.995137 | 1.576061 | 7.34E-12 | 2.00E-09 |
| FABP6     | 0.846414 | 2.635516 | 1.63865  | 0.000402 | 0.001144 |
| AL365356  | 0.074923 | 0.388386 | 2.374001 | 0.002019 | 0.004623 |
| ADCYAP1   | 1.084637 | 0.149072 | -2.86313 | 4.63E-07 | 3.85E-06 |
| CLDN14    | 0.078611 | 0.256646 | 1.706967 | 6.53E-06 | 3.50E-05 |
| ASB5      | 3.836821 | 0.721695 | -2.41045 | 0.000316 | 0.000934 |
| AC084083  | 0.145319 | 0.444353 | 1.612484 | 1.04E-05 | 5.18E-05 |
| PODXL     | 6.21197  | 17.57252 | 1.500199 | 3.82E-10 | 1.47E-08 |
| CIP2A     | 0.877135 | 3.217728 | 1.875172 | 7.34E-12 | 2.00E-09 |
| DUSP5     | 30.21641 | 9.601852 | -1.65395 | 0.000535 | 0.001466 |
| PBK       | 3.333874 | 11.48103 | 1.783981 | 2.18E-08 | 3.27E-07 |
| RCC2      | 16.38553 | 47.97339 | 1.549812 | 6.53E-12 | 1.99E-09 |
| AC060773  | 0.064927 | 0.252433 | 1.959004 | 3.38E-05 | 0.000139 |
| OXTR      | 0.179712 | 0.763262 | 2.08649  | 2.96E-09 | 6.79E-08 |
| Z93242.1  | 0.100694 | 0.377152 | 1.905173 | 1.60E-05 | 7.37E-05 |
| GHRL      | 16.46639 | 2.613006 | -2.65574 | 0.017166 | 0.029411 |
| AL121601  | 0.092314 | 0.35214  | 1.931526 | 1.79E-07 | 1.79E-06 |
| ANGPT2    | 0.656811 | 2.71281  | 2.046239 | 2.11E-11 | 2.71E-09 |
| ENDOU     | 10.35717 | 0.376616 | -4.78139 | 2.75E-05 | 0.000117 |
| FAM129A   | 33.94799 | 11.05429 | -1.61872 | 0.000199 | 0.000627 |
| MYMX      | 1.446559 | 0.482627 | -1.58364 | 8.39E-05 | 0.000299 |
| LINC01518 | 0.021574 | 0.468444 | 4.440485 | 0.001079 | 0.002692 |
| RNU6-181  | 0.147291 | 0.483927 | 1.716123 | 0.001682 | 0.003944 |
| BHMT2     | 2.814713 | 0.844032 | -1.73762 | 1.05E-05 | 5.23E-05 |
| STK31     | 0.09754  | 1.065588 | 3.449519 | 2.45E-09 | 5.85E-08 |
| AL691482  | 0.660029 | 2.776972 | 2.072912 | 1.23E-07 | 1.32E-06 |
| CHST13    | 0.417156 | 3.711403 | 3.153304 | 0.000122 | 0.000412 |
| AC012531  | 0.005964 | 0.276898 | 5.53685  | 3.62E-05 | 0.000148 |
| AL807752  | 0.082557 | 0.235652 | 1.51319  | 9.51E-08 | 1.07E-06 |
| AC091153  | 0.189026 | 0.579103 | 1.615232 | 2.91E-05 | 0.000123 |
| SMIM25    | 0.667162 | 2.298284 | 1.784447 | 2.79E-08 | 3.97E-07 |
| AC131571  | 0.09353  | 0.322809 | 1.787186 | 2.66E-05 | 0.000114 |
| CXCL11    | 2.732417 | 10.67899 | 1.966526 | 4.29E-06 | 2.47E-05 |
| MYO16-A   | 0.043663 | 0.279101 | 2.676289 | 0.012303 | 0.022012 |
| LINC00460 | 0.053928 | 0.518499 | 3.265236 | 1.06E-07 | 1.18E-06 |
| HPX       | 0.054604 | 0.323528 | 2.566807 | 6.03E-05 | 0.000226 |
| RNA5SP21  | 0.139336 | 0.45699  | 1.7136   | 0.000996 | 0.002515 |
| TDGF1P5   | 0.081017 | 0.271348 | 1.743837 | 2.19E-06 | 1.40E-05 |
| LINC02361 | 0.03008  | 0.615169 | 4.354125 | 4.15E-06 | 2.39E-05 |
| ASB2      | 9.957121 | 3.096603 | -1.68504 | 9.00E-05 | 0.000318 |
| CASQ2     | 16.75823 | 2.769882 | -2.59697 | 9.20E-08 | 1.04E-06 |
| ACTG1P3   | 0.21612  | 0.665889 | 1.62345  | 1.01E-09 | 2.99E-08 |
| MKRN9P    | 0.066243 | 0.267246 | 2.012333 | 0.020805 | 0.034797 |
| FNDC5     | 2.384122 | 0.706023 | -1.75567 | 4.49E-06 | 2.56E-05 |

|          |          |          |          |          |          |
|----------|----------|----------|----------|----------|----------|
| CHML     | 1.105429 | 3.405939 | 1.623447 | 3.49E-11 | 3.34E-09 |
| AC023825 | 0.101847 | 0.332357 | 1.706329 | 1.66E-06 | 1.11E-05 |
| AC073283 | 0.100963 | 0.527319 | 2.384856 | 1.61E-08 | 2.55E-07 |
| AC110588 | 0.083445 | 0.299462 | 1.843474 | 4.70E-05 | 0.000184 |
| LINC0050 | 0.058824 | 0.270259 | 2.199862 | 4.51E-06 | 2.57E-05 |
| FANCI    | 1.653563 | 6.556279 | 1.987299 | 2.61E-11 | 2.91E-09 |
| AL157871 | 0.314608 | 0.988636 | 1.651885 | 0.000247 | 0.000755 |
| PLA2G4E  | 0.076835 | 0.29413  | 1.936613 | 0.000496 | 0.001372 |
| MYOT     | 1.334454 | 0.255202 | -2.38654 | 3.61E-08 | 4.92E-07 |
| IGHV3OR  | 2.717339 | 0.433935 | -2.64664 | 0.014387 | 0.025257 |
| IGHV3-16 | 1.889452 | 0.175984 | -3.42445 | 0.026853 | 0.043373 |
| SULT2A1  | 6.500524 | 2.215415 | -1.55298 | 0.00324  | 0.006955 |
| AGBL2    | 0.127408 | 0.375496 | 1.559347 | 5.38E-07 | 4.36E-06 |
| PHF5CP   | 0.103523 | 0.329763 | 1.671481 | 3.94E-06 | 2.29E-05 |
| AC139720 | 0.035375 | 0.254385 | 2.846208 | 0.0068   | 0.013224 |
| AC007406 | 0.109967 | 0.488774 | 2.152097 | 5.99E-10 | 2.04E-08 |
| LINC0167 | 0.110592 | 0.644803 | 2.543606 | 0.02268  | 0.037495 |
| AC243967 | 0.039009 | 0.326708 | 3.066128 | 4.42E-05 | 0.000175 |
| SNORA58  | 0.119723 | 0.373544 | 1.641579 | 0.000981 | 0.002483 |
| ANLN     | 2.79978  | 12.08604 | 2.109956 | 2.61E-11 | 2.91E-09 |
| NRIR     | 0.13001  | 0.44152  | 1.76386  | 1.46E-05 | 6.86E-05 |
| UBE2T    | 7.319158 | 21.88746 | 1.580355 | 6.81E-09 | 1.31E-07 |
| AL589743 | 0.054381 | 0.342715 | 2.655839 | 3.44E-08 | 4.74E-07 |
| RNA5SP3  | 0.015847 | 0.603809 | 5.251847 | 0.000166 | 0.000535 |
| AL136418 | 0.193911 | 1.094608 | 2.496946 | 0.000132 | 0.00044  |
| AL354726 | 0.053112 | 0.221251 | 2.058583 | 1.26E-06 | 8.87E-06 |
| LINC0174 | 0.071023 | 0.605946 | 3.092838 | 3.70E-05 | 0.000151 |
| CORIN    | 0.072215 | 0.394485 | 2.449594 | 1.53E-09 | 4.10E-08 |
| SNORD62  | 0.120552 | 0.690776 | 2.518565 | 6.05E-07 | 4.80E-06 |
| CLSPN    | 0.592713 | 3.211715 | 2.437938 | 2.00E-12 | 1.40E-09 |
| CYP1A1   | 1.409894 | 0.171171 | -3.04208 | 0.000348 | 0.001011 |
| TAGLN    | 378.3015 | 123.5203 | -1.61479 | 8.23E-05 | 0.000294 |
| SGCG     | 0.797792 | 0.162325 | -2.29712 | 1.43E-07 | 1.49E-06 |
| DEFA5    | 624.081  | 16.90695 | -5.20604 | 0.000805 | 0.00209  |
| NKAIN4   | 0.139897 | 0.492958 | 1.817103 | 0.002152 | 0.004887 |
| ATAD2    | 2.200656 | 9.937563 | 2.174958 | 9.51E-13 | 1.31E-09 |
| FERP1    | 0.111967 | 0.325774 | 1.540802 | 3.37E-06 | 2.00E-05 |
| MAGEA6   | 0.015262 | 5.290794 | 8.437411 | 0.000246 | 0.000752 |
| CYP3A4   | 25.12219 | 1.751315 | -3.84245 | 0.016295 | 0.028133 |
| AL139002 | 0.002147 | 0.274763 | 6.999389 | 0.000342 | 0.000998 |
| AC024560 | 0.218631 | 0.820429 | 1.907879 | 6.35E-08 | 7.74E-07 |
| AL035252 | 0.166531 | 0.4802   | 1.527848 | 2.76E-06 | 1.70E-05 |
| RPS15AP6 | 0.196985 | 0.579744 | 1.557328 | 1.83E-05 | 8.28E-05 |
| KRT1     | 8.199241 | 0.200257 | -5.35556 | 0.001736 | 0.004055 |
| ERVMER3  | 0.356688 | 1.627895 | 2.190271 | 0.003187 | 0.006857 |
| PDZRN4   | 6.704642 | 0.846963 | -2.98479 | 3.14E-06 | 1.89E-05 |
| ORC1     | 1.123024 | 3.769197 | 1.746868 | 2.96E-09 | 6.79E-08 |
| LNCAROD  | 0.015736 | 0.296681 | 4.236751 | 0.023688 | 0.038946 |
| MIR647   | 4.459194 | 13.11955 | 1.556864 | 4.96E-07 | 4.09E-06 |
| MYOCD    | 7.429524 | 2.474448 | -1.58616 | 0.000114 | 0.000389 |
| MCM10    | 0.488646 | 2.494674 | 2.351988 | 5.66E-11 | 4.42E-09 |
| RAD54B   | 0.237866 | 0.828216 | 1.79986  | 6.86E-11 | 4.89E-09 |
| ACTL8    | 0.02676  | 3.40599  | 6.991849 | 8.82E-06 | 4.50E-05 |
| HAND2-A  | 5.837247 | 1.031479 | -2.50057 | 0.001164 | 0.002876 |
| MTATP6P  | 0.091413 | 0.265325 | 1.537295 | 0.000794 | 0.002063 |
| RNU6-13  | 0.098135 | 0.397013 | 2.016346 | 0.000138 | 0.000457 |
| AC005046 | 0.483313 | 1.372809 | 1.506101 | 6.76E-06 | 3.60E-05 |
| HSPB6    | 466.8402 | 98.74979 | -2.24108 | 4.81E-06 | 2.71E-05 |

|          |          |          |          |          |          |
|----------|----------|----------|----------|----------|----------|
| AL365440 | 0.071358 | 0.210907 | 1.563452 | 1.05E-07 | 1.17E-06 |
| MRGPRF   | 30.66792 | 10.26357 | -1.5792  | 0.005858 | 0.011617 |
| CEACAM6  | 57.47068 | 226.4174 | 1.978087 | 0.002367 | 0.005301 |
| PLEKHG4  | 0.707764 | 3.975509 | 2.489799 | 5.35E-10 | 1.87E-08 |
| AL031665 | 0.039539 | 0.263099 | 2.734264 | 0.000345 | 0.001005 |
| AP002336 | 0.062144 | 0.221365 | 1.83275  | 2.03E-05 | 9.03E-05 |
| PMFBP1   | 0.102321 | 0.440841 | 2.107154 | 8.48E-07 | 6.37E-06 |
| VIT      | 1.713962 | 0.301627 | -2.5065  | 3.04E-09 | 6.94E-08 |
| AC090246 | 0.070292 | 0.244074 | 1.795886 | 1.92E-05 | 8.61E-05 |
| CYP4A22- | 0.084404 | 0.392643 | 2.217834 | 1.23E-08 | 2.08E-07 |
| NRCAM    | 0.396781 | 2.064509 | 2.379383 | 0.001745 | 0.004071 |
| RNY1P13  | 0.150795 | 0.535024 | 1.827015 | 5.60E-05 | 0.000213 |
| FAM111B  | 1.594442 | 4.739363 | 1.571642 | 7.65E-08 | 8.97E-07 |
| AP000786 | 0.229991 | 0.800635 | 1.799566 | 4.51E-05 | 0.000178 |
| DAB1     | 1.395323 | 0.269894 | -2.37013 | 3.92E-06 | 2.28E-05 |
| INSYN1   | 1.418749 | 0.434815 | -1.70615 | 5.04E-06 | 2.82E-05 |
| HOXC13-  | 0.006251 | 0.248154 | 5.311093 | 0.000166 | 0.000535 |
| RNU6-45C | 0.162428 | 0.477258 | 1.554968 | 0.00085  | 0.002191 |
| AL591767 | 0.041371 | 0.230873 | 2.480414 | 6.54E-09 | 1.27E-07 |
| CDC45    | 1.623216 | 5.327151 | 1.714509 | 2.24E-09 | 5.47E-08 |
| AC138466 | 0.087067 | 0.264139 | 1.601098 | 1.38E-06 | 9.54E-06 |
| OBP2B    | 0.011396 | 0.337705 | 4.889168 | 0.000156 | 0.00051  |
| DEFA6    | 207.7274 | 11.42037 | -4.18501 | 0.017143 | 0.029393 |
| CD44-AS1 | 0.396391 | 1.19564  | 1.592786 | 3.69E-05 | 0.00015  |
| AC245100 | 0.022726 | 0.340063 | 3.903394 | 0.002889 | 0.006298 |
| TYRP1    | 0.418783 | 1.215333 | 1.537078 | 0.013455 | 0.023824 |
| MTND3P1  | 0.025209 | 0.225182 | 3.15907  | 2.65E-08 | 3.82E-07 |
| CXCR2    | 3.904955 | 1.00625  | -1.95632 | 0.00517  | 0.010437 |
| SAPCD2   | 4.177994 | 15.0205  | 1.84605  | 4.25E-09 | 8.97E-08 |
| AC106900 | 0.166519 | 1.047724 | 2.653504 | 3.78E-07 | 3.27E-06 |
| AC009237 | 0.408745 | 1.171374 | 1.518929 | 7.90E-05 | 0.000284 |
| RNU4ATA  | 0.180062 | 0.86528  | 2.264676 | 5.03E-07 | 4.13E-06 |
| FAXDC2   | 7.405937 | 2.561916 | -1.53146 | 3.11E-06 | 1.87E-05 |
| C1QTNF7  | 3.095701 | 0.865507 | -1.83865 | 5.73E-05 | 0.000217 |
| TNFSF11  | 0.162143 | 1.099128 | 2.761017 | 1.00E-10 | 6.06E-09 |
| RNU7-75F | 0.190303 | 0.948079 | 2.316708 | 2.12E-06 | 1.36E-05 |
| PIWIL1   | 0.012974 | 1.109053 | 6.417531 | 5.70E-08 | 7.08E-07 |
| MTBP     | 0.267892 | 1.1015   | 2.039744 | 2.37E-12 | 1.40E-09 |
| AC062037 | 0.083575 | 0.23973  | 1.520261 | 0.001518 | 0.003616 |
| LGALS9C  | 5.594538 | 0.879545 | -2.66919 | 0.00065  | 0.001732 |
| AC090912 | 0.056759 | 0.344491 | 2.601549 | 1.32E-07 | 1.41E-06 |
| AC012512 | 0.046515 | 0.563586 | 3.59886  | 1.54E-05 | 7.16E-05 |
| RNY3P13  | 0.078545 | 0.349992 | 2.155737 | 0.00108  | 0.002693 |
| GPT      | 9.360461 | 3.202362 | -1.54744 | 0.027354 | 0.044087 |
| NSG2     | 0.835872 | 0.277748 | -1.58951 | 4.24E-06 | 2.44E-05 |
| VCAN     | 4.4256   | 15.06808 | 1.767551 | 3.07E-08 | 4.31E-07 |
| WISP3    | 0.234143 | 1.103391 | 2.236481 | 0.00366  | 0.007738 |
| LINGO1   | 0.567298 | 2.262762 | 1.995906 | 8.08E-07 | 6.12E-06 |
| SNORA22  | 0.19386  | 0.589641 | 1.604821 | 5.91E-06 | 3.22E-05 |
| AC009097 | 0.118117 | 0.378967 | 1.68186  | 8.86E-06 | 4.51E-05 |
| ILDR1    | 1.150775 | 4.196454 | 1.866565 | 3.89E-09 | 8.45E-08 |
| SLCO1B3  | 0.124859 | 0.748527 | 2.583754 | 4.12E-05 | 0.000165 |
| SYNM     | 120.6229 | 26.57575 | -2.18232 | 7.99E-05 | 0.000287 |
| PSMD10P  | 0.272354 | 1.023236 | 1.909584 | 1.89E-09 | 4.82E-08 |
| ITGA8    | 10.79317 | 3.006739 | -1.84385 | 5.85E-05 | 0.000221 |
| LINC0247 | 0.124485 | 1.454177 | 3.546158 | 3.21E-05 | 0.000133 |
| AC079907 | 0.132358 | 0.396734 | 1.583724 | 1.37E-06 | 9.50E-06 |
| AC093458 | 0.096158 | 0.341234 | 1.827287 | 3.96E-05 | 0.00016  |

|          |          |          |          |          |          |
|----------|----------|----------|----------|----------|----------|
| BMP8A    | 0.60697  | 2.600769 | 2.09924  | 1.74E-10 | 8.46E-09 |
| EFS      | 6.476746 | 2.011959 | -1.68667 | 2.04E-05 | 9.10E-05 |
| MIR6797  | 0.17833  | 0.700142 | 1.973098 | 3.09E-06 | 1.86E-05 |
| LINC0108 | 4.862619 | 1.479632 | -1.71649 | 1.37E-07 | 1.44E-06 |
| RPSAP74  | 0.06431  | 0.223552 | 1.797502 | 0.000116 | 0.000396 |
| METTL27  | 1.086041 | 4.196715 | 1.950182 | 1.58E-05 | 7.31E-05 |
| CLEC5A   | 0.202242 | 0.882201 | 2.125022 | 2.05E-09 | 5.11E-08 |
| AC100797 | 0.069609 | 0.255485 | 1.875894 | 0.000186 | 0.000593 |
| AC021876 | 0.021513 | 0.298528 | 3.794572 | 1.07E-06 | 7.78E-06 |
| MMP12    | 10.51363 | 32.83861 | 1.643133 | 0.000215 | 0.000668 |
| AARD     | 1.38844  | 0.379856 | -1.86994 | 0.000357 | 0.001033 |
| RNU1-12  | 0.063766 | 0.261162 | 2.034089 | 0.000288 | 0.000861 |
| RNU6-12  | 0.168949 | 0.479207 | 1.504056 | 0.00052  | 0.00143  |
| KCNB1    | 1.809859 | 0.346594 | -2.38456 | 5.51E-06 | 3.05E-05 |
| E2F3     | 1.658168 | 5.125412 | 1.628078 | 2.37E-13 | 1.20E-09 |
| CYP4F22  | 4.360956 | 0.440955 | -3.30594 | 0.000728 | 0.001912 |
| AC016866 | 0.074846 | 0.345716 | 2.207598 | 2.15E-06 | 1.38E-05 |
| TICRR    | 0.665639 | 2.486593 | 1.901358 | 3.09E-09 | 7.01E-08 |
| IGF2BP1  | 0.02238  | 1.789484 | 6.321217 | 7.77E-06 | 4.05E-05 |
| AL031281 | 0.13878  | 0.426724 | 1.620501 | 6.95E-06 | 3.68E-05 |
| LSAMP-A  | 0.097014 | 0.388357 | 2.001115 | 0.002458 | 0.00548  |
| PTGDR2   | 3.104808 | 0.727399 | -2.09369 | 0.010118 | 0.018627 |
| MORN5    | 5.478905 | 0.976468 | -2.48824 | 0.003342 | 0.007145 |
| PTCHD1   | 1.629107 | 0.274667 | -2.56832 | 4.22E-05 | 0.000168 |
| C6orf58  | 41.72364 | 14.51317 | -1.5235  | 0.025726 | 0.041812 |
| AL591178 | 0.108407 | 0.495385 | 2.192093 | 0.000259 | 0.000786 |
| NUP62CL  | 0.476405 | 2.019506 | 2.083743 | 1.31E-07 | 1.39E-06 |
| ANKRD1   | 0.028841 | 0.717359 | 4.636483 | 4.59E-06 | 2.61E-05 |
| DNAJC19F | 0.053934 | 0.420307 | 2.962175 | 9.15E-07 | 6.79E-06 |
| SLC11A1  | 0.488257 | 1.584628 | 1.698431 | 7.55E-08 | 8.86E-07 |
| QRSL1    | 3.108025 | 10.55351 | 1.763653 | 9.55E-06 | 4.81E-05 |
| AC112777 | 0.201986 | 0.811919 | 2.007082 | 8.67E-10 | 2.70E-08 |
| AL137802 | 0.082525 | 0.313432 | 1.925253 | 0.000119 | 0.000405 |
| AC016542 | 0.072645 | 0.320688 | 2.142241 | 2.76E-07 | 2.52E-06 |
| ATP1B2   | 4.004607 | 1.292072 | -1.63197 | 0.000638 | 0.001706 |
| HAGLROS  | 0.239059 | 0.762716 | 1.673778 | 0.000351 | 0.001018 |
| AC073592 | 0.038002 | 0.272831 | 2.843868 | 1.54E-05 | 7.17E-05 |
| CDC6     | 1.578902 | 10.38101 | 2.716953 | 1.85E-10 | 8.91E-09 |
| AL354993 | 0.082315 | 0.259046 | 1.653976 | 0.002293 | 0.005156 |
| DSCC1    | 1.24427  | 5.224318 | 2.069944 | 3.33E-12 | 1.40E-09 |
| AL357033 | 0.037416 | 0.265924 | 2.829283 | 0.000744 | 0.001951 |
| ENPP3    | 1.881674 | 0.266783 | -2.81828 | 8.31E-05 | 0.000297 |
| MIR16-1  | 0.086809 | 0.347614 | 2.001574 | 0.000899 | 0.0023   |
| LINC0065 | 0.740642 | 2.550265 | 1.783798 | 2.16E-05 | 9.51E-05 |
| AC090559 | 0.288322 | 0.819006 | 1.506194 | 0.000103 | 0.000357 |
| ANK2     | 2.996087 | 1.037073 | -1.53056 | 0.001008 | 0.002537 |
| AC007996 | 0.495885 | 1.490766 | 1.587977 | 9.33E-08 | 1.05E-06 |
| MIR3680- | 0.10746  | 0.351938 | 1.711522 | 0.000885 | 0.002269 |
| HJURP    | 1.407605 | 5.616995 | 1.996556 | 2.77E-10 | 1.18E-08 |
| RERG     | 10.45102 | 2.658815 | -1.97479 | 0.009842 | 0.018198 |
| NRBF2P5  | 0.230294 | 0.652374 | 1.502222 | 2.39E-07 | 2.24E-06 |
| LINC0170 | 0.126739 | 1.035889 | 3.030931 | 1.07E-07 | 1.19E-06 |
| RNA5SP21 | 0.410141 | 1.262173 | 1.621718 | 5.70E-06 | 3.14E-05 |
| PLCD4    | 2.644367 | 0.817221 | -1.69412 | 0.028545 | 0.045738 |
| AL391095 | 0.062936 | 0.288166 | 2.194949 | 1.47E-07 | 1.53E-06 |
| MIR643   | 0.143021 | 0.512314 | 1.8408   | 4.61E-05 | 0.000181 |
| TMEM26   | 0.087853 | 0.376028 | 2.097672 | 9.11E-12 | 2.07E-09 |
| RNU6-87  | 0.056911 | 0.446536 | 2.971992 | 3.04E-06 | 1.84E-05 |

|          |          |          |          |          |          |
|----------|----------|----------|----------|----------|----------|
| SNORD12  | 0.498473 | 1.595095 | 1.678057 | 1.25E-06 | 8.77E-06 |
| E2F1     | 2.880725 | 11.07106 | 1.94229  | 5.84E-11 | 4.46E-09 |
| RNU6-70  | 0.037029 | 0.377585 | 3.350068 | 7.43E-06 | 3.90E-05 |
| AP000523 | 0.09678  | 0.43384  | 2.164385 | 1.42E-07 | 1.48E-06 |
| ARHGFE3  | 0.091587 | 0.476728 | 2.379946 | 3.34E-07 | 2.96E-06 |
| RNU7-18  | 0.216856 | 0.778475 | 1.843913 | 0.000655 | 0.001746 |
| S100A8   | 795.2633 | 69.01211 | -3.52651 | 0.002424 | 0.005409 |
| CFAP157  | 0.249759 | 0.78712  | 1.656045 | 8.53E-12 | 2.04E-09 |
| AZU1     | 0.033719 | 0.63675  | 4.239106 | 0.005281 | 0.010642 |
| AL121772 | 0.125179 | 0.587098 | 2.229611 | 4.98E-06 | 2.79E-05 |
| HSPA2    | 11.78369 | 3.067673 | -1.94158 | 0.00044  | 0.001238 |
| AL356320 | 0.149383 | 0.746601 | 2.321318 | 1.15E-07 | 1.25E-06 |
| AC068658 | 0.029541 | 0.37225  | 3.6555   | 0.003845 | 0.008079 |
| MIR6069  | 0.081126 | 0.229493 | 1.500224 | 0.007388 | 0.014204 |
| AF001548 | 5.139606 | 1.39528  | -1.8811  | 0.000562 | 0.001529 |
| CHIT1    | 0.107316 | 1.361995 | 3.665783 | 0.000137 | 0.000455 |
| FIRRE    | 0.042223 | 0.407782 | 3.271682 | 1.89E-09 | 4.82E-08 |
| FXVD6    | 15.86424 | 3.631172 | -2.12727 | 0.000526 | 0.001443 |
| AL133373 | 0.063187 | 0.49649  | 2.974061 | 0.000156 | 0.000508 |
| SHISA2   | 0.917535 | 3.201186 | 1.802771 | 0.002134 | 0.004851 |
| FOX2-A   | 0.682004 | 2.923125 | 2.099659 | 5.40E-11 | 4.30E-09 |
| FBXO41   | 0.835717 | 2.585791 | 1.629519 | 2.12E-08 | 3.19E-07 |
| LINC0134 | 0.130405 | 0.517776 | 1.989334 | 0.000703 | 0.001855 |
| AC112206 | 0.041042 | 0.255287 | 2.636945 | 0.009797 | 0.018129 |
| SPINK2   | 2.288242 | 0.244273 | -3.22767 | 0.000146 | 0.000483 |
| LINC0225 | 0.025857 | 0.27809  | 3.426937 | 0.007893 | 0.015045 |
| AC023825 | 0.040793 | 0.242563 | 2.571958 | 3.04E-09 | 6.94E-08 |
| AL121895 | 0.091857 | 0.340939 | 1.892051 | 8.91E-07 | 6.63E-06 |
| AP005899 | 0.319355 | 0.984386 | 1.624061 | 1.08E-07 | 1.19E-06 |
| KCNJ16   | 2.03399  | 0.360686 | -2.4955  | 0.003363 | 0.007189 |
| AC087072 | 0.072083 | 0.216621 | 1.587442 | 7.11E-05 | 0.00026  |
| CIDEC    | 22.14855 | 2.16126  | -3.35727 | 0.00037  | 0.001067 |
| IL37     | 0.018372 | 0.380323 | 4.371682 | 1.51E-08 | 2.44E-07 |
| AC103760 | 0.256169 | 0.803921 | 1.649958 | 2.70E-06 | 1.67E-05 |
| WDR66    | 0.063855 | 0.255819 | 2.002241 | 5.71E-08 | 7.08E-07 |
| MMS22L   | 0.302713 | 0.945913 | 1.643759 | 2.41E-11 | 2.88E-09 |
| AC005840 | 0.237632 | 0.704117 | 1.567087 | 4.69E-07 | 3.89E-06 |
| KCNJ14   | 0.195071 | 0.666582 | 1.77278  | 1.12E-10 | 6.54E-09 |
| AF127577 | 0.008118 | 0.389628 | 5.584754 | 5.26E-08 | 6.64E-07 |
| BRCA2    | 0.484314 | 1.855185 | 1.93755  | 6.75E-11 | 4.85E-09 |
| Z98200.1 | 0.097984 | 0.305124 | 1.638777 | 1.05E-05 | 5.22E-05 |
| GINS1    | 1.360942 | 5.675978 | 2.060263 | 6.86E-11 | 4.89E-09 |
| BTBD16   | 0.109234 | 1.024589 | 3.22955  | 5.34E-09 | 1.08E-07 |
| MIR4269  | 1.582641 | 0.487684 | -1.69832 | 0.022108 | 0.036671 |
| SYNDIG1  | 0.628581 | 1.816011 | 1.530602 | 6.09E-05 | 0.000228 |
| EMILIN3  | 0.983754 | 0.314817 | -1.64378 | 3.94E-07 | 3.37E-06 |
| TPX2     | 6.50795  | 32.80875 | 2.333806 | 2.92E-11 | 3.09E-09 |
| SNORD1B  | 0.141239 | 0.702875 | 2.315135 | 1.41E-06 | 9.72E-06 |
| SIX4     | 0.343517 | 1.142341 | 1.733541 | 6.24E-06 | 3.38E-05 |
| RN7SKP17 | 0.066961 | 0.287732 | 2.103338 | 2.51E-07 | 2.33E-06 |
| AL118505 | 0.329745 | 1.272536 | 1.948285 | 4.60E-08 | 5.99E-07 |
| HNF1A-A  | 1.648452 | 7.024875 | 2.091361 | 8.85E-08 | 1.01E-06 |
| RNU6-61  | 0.126603 | 0.668552 | 2.400727 | 2.45E-05 | 0.000106 |
| RNU6-28  | 0.268096 | 0.787503 | 1.554537 | 2.53E-05 | 0.000109 |
| AC055748 | 0.074588 | 0.318665 | 2.095029 | 6.77E-05 | 0.00025  |
| LINC0049 | 0.115724 | 0.440218 | 1.927524 | 0.001634 | 0.003849 |
| MIR3174  | 0.262202 | 0.960648 | 1.873328 | 6.09E-05 | 0.000228 |
| AC005041 | 0.274633 | 0.918464 | 1.741717 | 2.24E-08 | 3.34E-07 |



|           |          |          |          |          |          |
|-----------|----------|----------|----------|----------|----------|
| Z82243.1  | 0.38048  | 1.07999  | 1.505124 | 4.48E-08 | 5.85E-07 |
| IGHV3OR:  | 3.615554 | 0.527648 | -2.77657 | 0.015914 | 0.027571 |
| AC106820  | 0.239925 | 0.681618 | 1.506379 | 7.88E-07 | 5.99E-06 |
| RPL23AP2  | 0.071427 | 0.23353  | 1.709074 | 7.43E-05 | 0.00027  |
| CDC25A    | 1.018821 | 2.99663  | 1.55644  | 3.42E-08 | 4.71E-07 |
| TONSL     | 2.196441 | 6.921604 | 1.655939 | 4.59E-10 | 1.68E-08 |
| AC126696  | 0.059266 | 0.210988 | 1.831893 | 6.24E-05 | 0.000233 |
| RNU6-89C  | 0.198579 | 0.603678 | 1.604068 | 0.000144 | 0.000475 |
| RNU1-10C  | 0.331988 | 1.74358  | 2.392849 | 6.95E-09 | 1.33E-07 |
| IGKV1D-3  | 2.09835  | 0.164766 | -3.67077 | 0.003933 | 0.00824  |
| PGGHG     | 2.506939 | 8.549963 | 1.769991 | 1.15E-07 | 1.26E-06 |
| IGBP1-AS: | 0.090867 | 0.327007 | 1.847494 | 4.36E-08 | 5.73E-07 |
| NPY6R     | 1.786743 | 0.292798 | -2.60936 | 0.001238 | 0.003036 |
| CACNG8    | 0.043017 | 0.235132 | 2.450492 | 2.29E-06 | 1.45E-05 |
| RNU6-10C  | 0.235336 | 0.781259 | 1.731078 | 6.70E-06 | 3.58E-05 |
| AL356652  | 0.117419 | 0.456387 | 1.958596 | 7.15E-08 | 8.48E-07 |
| PCSK2     | 1.07589  | 0.298396 | -1.85023 | 1.22E-08 | 2.07E-07 |
| AC104809  | 0.031131 | 0.37118  | 3.575681 | 0.019081 | 0.032242 |
| GTF2IP23  | 0.581209 | 1.988892 | 1.774836 | 1.17E-08 | 1.99E-07 |
| S100A7    | 3.811125 | 98.84484 | 4.696877 | 0.003483 | 0.007419 |
| SNRPCP1:  | 0.115077 | 0.389865 | 1.760373 | 0.000372 | 0.00107  |
| LINC0254: | 0.799367 | 3.786133 | 2.243796 | 0.012839 | 0.022864 |
| SNORD53   | 0.187617 | 0.617587 | 1.71885  | 0.00011  | 0.000377 |
| CCDC144I  | 0.073332 | 0.502094 | 2.775443 | 4.39E-05 | 0.000174 |
| LMO7-AS   | 0.282576 | 0.898686 | 1.669176 | 1.90E-05 | 8.53E-05 |
| HNRNPA1   | 0.24834  | 0.953188 | 1.940445 | 1.61E-10 | 8.13E-09 |
| GNG7      | 5.904562 | 1.684822 | -1.80923 | 3.13E-10 | 1.27E-08 |
| STC2      | 0.477216 | 1.685847 | 1.820758 | 6.79E-08 | 8.14E-07 |
| ESRRG     | 2.437658 | 0.345677 | -2.818   | 3.33E-08 | 4.61E-07 |
| MLNR      | 2.258565 | 0.388486 | -2.53947 | 0.014604 | 0.025587 |
| RF00340   | 0.073356 | 0.215324 | 1.553517 | 0.002258 | 0.005091 |
| SLC25A34  | 3.107536 | 0.645565 | -2.26714 | 0.001433 | 0.003444 |
| HOXB9     | 1.932982 | 7.068486 | 1.870573 | 4.41E-07 | 3.69E-06 |
| MMRN1     | 4.887329 | 1.52169  | -1.68337 | 1.54E-08 | 2.46E-07 |
| HAL       | 0.109646 | 0.353807 | 1.690106 | 0.014572 | 0.025535 |
| COL5A2    | 8.854249 | 33.12449 | 1.903456 | 2.85E-10 | 1.20E-08 |
| RNU4-80F  | 0.678468 | 2.488018 | 1.874645 | 0.000414 | 0.001174 |
| AL390726  | 0.102465 | 0.38903  | 1.924757 | 0.0017   | 0.003983 |
| NEB       | 0.048513 | 1.049055 | 4.434561 | 1.53E-09 | 4.10E-08 |
| SH3GL2    | 1.104182 | 0.186181 | -2.5682  | 3.96E-09 | 8.55E-08 |
| RNU6-92E  | 0.413024 | 1.477691 | 1.839046 | 1.25E-07 | 1.34E-06 |
| MUCL1     | 0.025457 | 1.410922 | 5.792435 | 0.007337 | 0.014117 |
| RNU6-62E  | 0.071638 | 0.319199 | 2.155659 | 0.000148 | 0.000487 |
| AC011465  | 0.287294 | 1.237217 | 2.106498 | 2.67E-09 | 6.29E-08 |
| ABCA8     | 2.957319 | 1.042353 | -1.50445 | 1.67E-06 | 1.11E-05 |
| MT1X      | 35.88993 | 11.44144 | -1.64931 | 3.06E-07 | 2.75E-06 |
| SLC16A8   | 0.187439 | 0.57446  | 1.615789 | 4.87E-06 | 2.74E-05 |
| CXCL6     | 0.309888 | 4.176066 | 3.752326 | 1.11E-07 | 1.22E-06 |
| IBSP      | 0.088482 | 0.760205 | 3.102931 | 1.46E-09 | 3.96E-08 |
| AC136475  | 1.761686 | 7.180406 | 2.027108 | 1.24E-05 | 6.00E-05 |
| TRPM2-A:  | 0.220076 | 1.959325 | 3.154283 | 8.43E-09 | 1.55E-07 |
| CLCA1     | 59.75222 | 4.984992 | -3.58333 | 0.010816 | 0.019727 |
| RN7SL368  | 0.429833 | 2.480934 | 2.529036 | 1.64E-09 | 4.34E-08 |
| GSTM5     | 2.706607 | 0.556247 | -2.28269 | 8.04E-10 | 2.55E-08 |
| SEMA5B    | 0.165185 | 0.562405 | 1.767529 | 8.43E-09 | 1.55E-07 |
| CELSR3    | 0.448335 | 2.028006 | 2.177413 | 3.88E-10 | 1.48E-08 |
| SP8       | 0.006513 | 0.376377 | 5.852727 | 1.73E-07 | 1.74E-06 |
| AC140479  | 0.037589 | 0.263935 | 2.811817 | 1.79E-08 | 2.79E-07 |

|          |          |          |          |          |          |
|----------|----------|----------|----------|----------|----------|
| ARHGEF2  | 9.750509 | 3.253662 | -1.58341 | 0.000814 | 0.002112 |
| LINC0183 | 0.030415 | 1.123811 | 5.207474 | 2.12E-07 | 2.06E-06 |
| ATAD5    | 0.620342 | 2.168704 | 1.805697 | 7.98E-12 | 2.04E-09 |
| RANBP17  | 0.131944 | 0.442864 | 1.746938 | 0.000157 | 0.00051  |
| NR4A3    | 11.70857 | 2.75722  | -2.08628 | 0.025886 | 0.041997 |
| CASC8    | 0.23759  | 0.748027 | 1.654617 | 9.45E-05 | 0.000331 |
| C9orf50  | 0.089438 | 0.272633 | 1.607997 | 2.18E-05 | 9.59E-05 |
| ACTN2    | 2.747867 | 0.566454 | -2.27828 | 0.012002 | 0.021551 |
| AC131009 | 0.500533 | 2.029177 | 2.019356 | 3.33E-11 | 3.27E-09 |
| MFAP2    | 1.727514 | 8.963222 | 2.37532  | 1.52E-08 | 2.44E-07 |
| SLC4A11  | 1.720538 | 5.628918 | 1.709998 | 4.10E-06 | 2.37E-05 |
| CIDEA    | 1.896366 | 0.17949  | -3.40127 | 1.04E-09 | 3.06E-08 |
| RNU6-117 | 0.08364  | 0.327177 | 1.967809 | 0.000307 | 0.000909 |
| KCNMB2   | 0.025381 | 0.91945  | 5.178963 | 2.22E-08 | 3.32E-07 |
| AL358232 | 0.298603 | 1.543134 | 2.369561 | 5.78E-08 | 7.15E-07 |
| AL021407 | 0.063935 | 0.284367 | 2.153084 | 8.68E-06 | 4.44E-05 |
| ANOS1    | 0.516173 | 1.816811 | 1.815481 | 1.74E-07 | 1.75E-06 |
| GPR19    | 0.162033 | 0.47899  | 1.563707 | 3.47E-07 | 3.04E-06 |
| SBK1     | 0.588992 | 2.261128 | 1.940722 | 0.002405 | 0.005371 |
| SNORD70  | 0.214097 | 0.843007 | 1.977281 | 1.92E-06 | 1.25E-05 |
| AC008443 | 0.028486 | 0.453557 | 3.992983 | 6.87E-05 | 0.000253 |
| CLDN1    | 9.597586 | 27.70942 | 1.529633 | 1.56E-08 | 2.49E-07 |
| RN7SL329 | 0.19168  | 0.567654 | 1.566311 | 2.51E-05 | 0.000108 |
| CCDC187  | 0.065274 | 0.31778  | 2.28344  | 0.003389 | 0.00724  |
| AL442067 | 0.103841 | 0.32295  | 1.636941 | 5.48E-05 | 0.000209 |
| AC026250 | 0.077791 | 0.249501 | 1.681364 | 5.72E-07 | 4.58E-06 |
| RN7SKP97 | 0.094863 | 0.373519 | 1.977268 | 6.30E-07 | 4.96E-06 |
| PLK4     | 1.100018 | 3.447757 | 1.648131 | 1.44E-09 | 3.92E-08 |
| ATP1A2   | 9.423339 | 1.794094 | -2.39298 | 1.14E-07 | 1.24E-06 |
| AL023284 | 1.398007 | 4.086319 | 1.54743  | 3.29E-06 | 1.96E-05 |
| SNORA71  | 0.462509 | 2.618908 | 2.501411 | 1.66E-10 | 8.26E-09 |
| AC090116 | 0.009468 | 0.40235  | 5.409283 | 2.15E-06 | 1.38E-05 |
| ANKRD10  | 2.40275  | 8.558995 | 1.832755 | 6.71E-10 | 2.24E-08 |
| AC245884 | 0.272422 | 0.780549 | 1.518648 | 5.45E-07 | 4.40E-06 |
| EIF4HP2  | 0.211023 | 0.623954 | 1.564042 | 2.40E-07 | 2.25E-06 |
| CEMIP    | 1.005536 | 10.70953 | 3.41286  | 6.03E-11 | 4.52E-09 |
| OR7E128F | 0.112877 | 0.464997 | 2.042467 | 7.31E-09 | 1.39E-07 |
| ECT2     | 4.10072  | 20.73156 | 2.33788  | 8.96E-12 | 2.06E-09 |
| AP002478 | 0.007655 | 0.302651 | 5.305067 | 7.48E-10 | 2.43E-08 |
| AC008760 | 0.668238 | 2.24332  | 1.747201 | 0.000101 | 0.000351 |
| AP000344 | 0.029338 | 0.2254   | 2.941621 | 0.002573 | 0.005704 |
| AC012213 | 0.107428 | 0.307584 | 1.517614 | 7.79E-07 | 5.93E-06 |
| TRIM72   | 0.04067  | 0.349194 | 3.101992 | 0.00058  | 0.001571 |
| MIR27B   | 2.203966 | 0.670152 | -1.71754 | 0.002059 | 0.004701 |
| TUFMP1   | 0.088348 | 0.331265 | 1.906714 | 0.005325 | 0.010711 |
| RF00494  | 0.104966 | 0.333633 | 1.668344 | 3.23E-06 | 1.93E-05 |
| AL591806 | 0.215871 | 0.772612 | 1.839572 | 3.39E-06 | 2.01E-05 |
| AC005479 | 0.076069 | 0.24889  | 1.710119 | 9.22E-06 | 4.67E-05 |
| C1orf112 | 0.538796 | 1.720736 | 1.675215 | 2.37E-12 | 1.40E-09 |
| RN7SL381 | 0.252021 | 0.844296 | 1.744205 | 1.82E-08 | 2.81E-07 |
| TTK      | 1.216796 | 4.92455  | 2.016905 | 9.49E-10 | 2.88E-08 |
| MLXIPL   | 1.602197 | 5.701781 | 1.831361 | 0.001788 | 0.004159 |
| MIR4285  | 0.0918   | 0.321154 | 1.806691 | 0.024269 | 0.039787 |
| MIR101-2 | 0.168954 | 0.53947  | 1.674912 | 0.009894 | 0.018288 |
| ADIPOQ   | 1.615048 | 0.526981 | -1.61575 | 2.83E-08 | 4.02E-07 |
| DMBX1    | 0.142766 | 0.699252 | 2.292165 | 2.70E-09 | 6.36E-08 |
| MIR5697  | 0.036746 | 0.364003 | 3.308303 | 9.96E-05 | 0.000346 |
| MCM8     | 1.361076 | 4.352033 | 1.676942 | 3.16E-12 | 1.40E-09 |

|           |          |          |          |          |          |
|-----------|----------|----------|----------|----------|----------|
| PENK      | 4.54293  | 0.643235 | -2.82021 | 0.006563 | 0.012827 |
| SMOC2     | 66.13318 | 21.45287 | -1.6242  | 0.008383 | 0.015849 |
| AC087284  | 0.325309 | 0.958044 | 1.558281 | 1.51E-06 | 1.03E-05 |
| AKR1C1    | 10.52963 | 3.333319 | -1.65942 | 3.84E-07 | 3.30E-06 |
| VIP       | 16.97405 | 2.916114 | -2.54121 | 4.44E-05 | 0.000175 |
| FABP4     | 15.87788 | 4.637632 | -1.77556 | 7.96E-09 | 1.48E-07 |
| AL035252  | 0.196952 | 0.705925 | 1.841667 | 9.05E-09 | 1.64E-07 |
| AC004134  | 0.102335 | 0.427649 | 2.063136 | 4.95E-07 | 4.08E-06 |
| CBWD4P    | 0.18409  | 0.532317 | 1.531873 | 2.50E-05 | 0.000108 |
| ADAMTS1   | 0.504353 | 3.426724 | 2.764325 | 8.53E-12 | 2.04E-09 |
| KRT24     | 1.56372  | 0.274873 | -2.50815 | 4.01E-09 | 8.63E-08 |
| AC008808  | 2.726476 | 0.850093 | -1.68135 | 0.00035  | 0.001018 |
| KRT7-AS   | 0.070722 | 1.048844 | 3.890502 | 2.50E-08 | 3.63E-07 |
| AC022211  | 0.483485 | 1.54498  | 1.676045 | 6.74E-08 | 8.10E-07 |
| PLIN1     | 3.041584 | 0.946813 | -1.68367 | 1.49E-07 | 1.54E-06 |
| RAD54L    | 0.894855 | 3.081424 | 1.783871 | 1.19E-09 | 3.38E-08 |
| AP000487  | 0.084377 | 0.26458  | 1.648784 | 6.04E-05 | 0.000227 |
| FOSB      | 95.20635 | 14.3947  | -2.72552 | 0.003416 | 0.007289 |
| CARTPT    | 11.60007 | 1.895212 | -2.6137  | 0.000227 | 0.000703 |
| AC105339  | 0.079409 | 0.250284 | 1.6562   | 1.47E-05 | 6.87E-05 |
| OR5BA1P   | 0.04888  | 0.216511 | 2.147137 | 0.000711 | 0.001875 |
| MDFI      | 3.666815 | 10.74976 | 1.551705 | 4.30E-07 | 3.62E-06 |
| AC108860  | 0.403546 | 1.174168 | 1.540832 | 1.45E-07 | 1.50E-06 |
| RF00093   | 0.034822 | 0.28177  | 3.016449 | 1.27E-05 | 6.11E-05 |
| LINC0254  | 0.083833 | 0.56959  | 2.764342 | 2.40E-08 | 3.52E-07 |
| TMEM270   | 0.070877 | 0.291585 | 2.04052  | 5.40E-05 | 0.000207 |
| AC010789  | 0.151776 | 1.436128 | 3.242166 | 5.12E-06 | 2.86E-05 |
| PGBD5     | 0.13874  | 0.482842 | 1.799167 | 0.000335 | 0.000979 |
| AC020978  | 0.0726   | 0.265564 | 1.87102  | 6.41E-07 | 5.03E-06 |
| AP000593  | 0.060344 | 0.257339 | 2.092387 | 2.33E-06 | 1.47E-05 |
| EVA1A     | 0.240303 | 1.623638 | 2.756301 | 4.43E-09 | 9.27E-08 |
| RNA5SP1f  | 0.044895 | 0.247322 | 2.461771 | 0.000716 | 0.001887 |
| PON1      | 0.041225 | 0.38596  | 3.22686  | 0.005634 | 0.011244 |
| SFRP1     | 22.07367 | 4.312455 | -2.35574 | 4.07E-09 | 8.71E-08 |
| VCX       | 0.004281 | 0.521896 | 6.929787 | 3.80E-05 | 0.000154 |
| KIF18B    | 1.330327 | 6.518794 | 2.292824 | 5.84E-11 | 4.46E-09 |
| PSAPL1    | 25.20971 | 3.053206 | -3.04558 | 0.002619 | 0.005795 |
| ALPP      | 0.158369 | 2.09927  | 3.728525 | 6.34E-09 | 1.24E-07 |
| RPL18P10  | 0.197247 | 0.622256 | 1.657502 | 4.22E-07 | 3.57E-06 |
| LINC0257  | 0.057511 | 0.707241 | 3.620292 | 1.61E-09 | 4.27E-08 |
| SERPINH1  | 16.3595  | 46.90937 | 1.519748 | 3.33E-11 | 3.27E-09 |
| SLC2A4    | 9.157611 | 2.116182 | -2.11351 | 1.57E-06 | 1.06E-05 |
| C1QL1     | 7.61197  | 2.248946 | -1.75902 | 2.17E-07 | 2.08E-06 |
| MIR608    | 0.107102 | 0.443196 | 2.048953 | 0.000197 | 0.000622 |
| TDRD6     | 0.111631 | 0.333542 | 1.579124 | 2.04E-06 | 1.31E-05 |
| GPM6B     | 6.316997 | 1.132888 | -2.47923 | 4.58E-07 | 3.81E-06 |
| LINC0135f | 0.15077  | 0.496721 | 1.720088 | 6.57E-06 | 3.52E-05 |
| SMIM5     | 2.151829 | 0.657467 | -1.71057 | 3.52E-07 | 3.07E-06 |
| GJB7      | 0.036703 | 0.283957 | 2.95172  | 0.004937 | 0.010036 |
| MIR661    | 0.112388 | 0.419005 | 1.898477 | 0.001448 | 0.003476 |
| IGLV1-50  | 13.77548 | 1.804362 | -2.93254 | 0.026284 | 0.042553 |
| CAB39L    | 10.18649 | 3.168399 | -1.68483 | 5.21E-06 | 2.90E-05 |
| AMPD1     | 1.993756 | 0.316176 | -2.65669 | 0.002858 | 0.006241 |
| PRR13P2   | 0.179837 | 0.546049 | 1.602338 | 7.06E-08 | 8.40E-07 |
| RNU6-71f  | 0.178707 | 0.593367 | 1.731327 | 0.00024  | 0.000737 |
| RTN4RL2   | 0.75573  | 3.138731 | 2.054239 | 9.24E-07 | 6.84E-06 |
| AC009237  | 0.310842 | 1.086087 | 1.804886 | 1.90E-06 | 1.24E-05 |
| KRTAP5-5  | 0.029772 | 0.302733 | 3.346009 | 0.001063 | 0.002655 |

|           |          |          |          |          |          |
|-----------|----------|----------|----------|----------|----------|
| AC114737  | 0.091495 | 0.358751 | 1.971213 | 2.23E-05 | 9.79E-05 |
| LINC01474 | 0.104924 | 0.351187 | 1.742892 | 0.030936 | 0.049041 |
| RNU6-237  | 0.111112 | 0.446854 | 2.00768  | 7.96E-05 | 0.000286 |
| RNU6-134  | 0.18516  | 0.771877 | 2.0596   | 3.51E-05 | 0.000144 |
| GUCA2B    | 9.550743 | 0.768702 | -3.63512 | 0.002848 | 0.006225 |
| NDC80     | 1.257401 | 4.95749  | 1.979165 | 3.44E-11 | 3.31E-09 |
| PROSER2-  | 0.080544 | 0.283973 | 1.817896 | 0.0001   | 0.000348 |
| FLRT1     | 1.093771 | 0.289846 | -1.91595 | 0.015362 | 0.026717 |
| AC020891  | 0.043108 | 0.225756 | 2.388749 | 2.31E-05 | 0.000101 |
| SOX14     | 0.130156 | 0.866889 | 2.73561  | 0.016421 | 0.028316 |
| P2RY14    | 7.372499 | 2.083537 | -1.82312 | 4.63E-09 | 9.61E-08 |
| ANKRD18   | 0.182271 | 0.532177 | 1.545821 | 0.001145 | 0.002835 |
| AC004837  | 0.127404 | 0.364062 | 1.514769 | 2.56E-07 | 2.37E-06 |
| CTSV      | 1.625497 | 6.157275 | 1.921411 | 4.26E-05 | 0.00017  |
| AL162413  | 0.491618 | 4.925171 | 3.324564 | 0.000901 | 0.002306 |
| TM4SF19   | 0.100515 | 0.338358 | 1.751148 | 1.28E-06 | 8.96E-06 |
| DLX6      | 0.048631 | 0.600029 | 3.625097 | 0.019468 | 0.032817 |
| DMRTA1    | 0.8551   | 0.268524 | -1.67104 | 3.93E-07 | 3.37E-06 |
| PWAR5     | 0.990658 | 0.329071 | -1.58999 | 0.000152 | 0.000499 |
| RASGEF1A  | 0.327368 | 1.362641 | 2.057421 | 1.23E-05 | 5.94E-05 |
| BANCR     | 0.036075 | 2.852437 | 6.305041 | 8.59E-05 | 0.000306 |
| EGR4      | 0.135978 | 0.613005 | 2.172523 | 0.004764 | 0.009723 |
| AC124067  | 0.284333 | 2.438384 | 3.100271 | 2.61E-06 | 1.62E-05 |
| KNTC1     | 1.111252 | 3.737517 | 1.749894 | 3.28E-11 | 3.26E-09 |
| AC011466  | 0.051821 | 0.26768  | 2.368897 | 4.79E-08 | 6.17E-07 |
| AC000061  | 0.05851  | 0.863029 | 3.882643 | 0.000103 | 0.000356 |
| CCNF      | 1.608866 | 4.859578 | 1.594787 | 1.72E-09 | 4.49E-08 |
| HUNK      | 0.418994 | 1.415046 | 1.755849 | 0.015668 | 0.027185 |
| MMP8      | 0.008814 | 0.228432 | 4.695777 | 2.25E-07 | 2.15E-06 |
| AC034229  | 0.147684 | 0.430856 | 1.54469  | 0.000267 | 0.000807 |
| LIPG      | 0.741304 | 2.612126 | 1.817088 | 3.70E-07 | 3.20E-06 |
| AC092451  | 0.135547 | 0.393957 | 1.539247 | 0.005966 | 0.011812 |
| POLQ      | 0.415303 | 1.803995 | 2.11896  | 7.13E-10 | 2.33E-08 |
| TNXB      | 11.68715 | 3.669808 | -1.67115 | 1.68E-05 | 7.72E-05 |
| AL161725  | 0.071838 | 0.231469 | 1.688005 | 0.000526 | 0.001444 |
| IGHG4     | 45.35539 | 249.5981 | 2.460261 | 0.000219 | 0.000679 |
| AC007128  | 0.031266 | 0.566479 | 4.179343 | 5.41E-10 | 1.89E-08 |
| MIR3682   | 1.079431 | 3.174449 | 1.556235 | 1.70E-05 | 7.79E-05 |
| AC068491  | 0.089758 | 0.808857 | 3.171767 | 3.45E-10 | 1.36E-08 |
| NKILA     | 0.31205  | 1.382473 | 2.1474   | 1.19E-06 | 8.45E-06 |
| LINC02533 | 0.077646 | 1.930369 | 4.635828 | 0.000308 | 0.000912 |
| AL356417  | 0.035477 | 0.271891 | 2.938088 | 3.00E-08 | 4.24E-07 |
| TPM1      | 87.59655 | 26.73963 | -1.71189 | 0.008929 | 0.016719 |
| WDR72     | 0.3245   | 3.439294 | 3.405824 | 3.56E-07 | 3.10E-06 |
| C20orf204 | 0.092241 | 0.813438 | 3.140554 | 5.31E-07 | 4.32E-06 |
| ZHX1-C8c  | 0.168602 | 0.492915 | 1.547715 | 8.84E-11 | 5.71E-09 |
| CIT       | 0.97697  | 2.765115 | 1.500953 | 1.14E-10 | 6.59E-09 |
| AC023389  | 0.235454 | 0.851014 | 1.853737 | 4.19E-08 | 5.54E-07 |
| FNDC11    | 0.11965  | 0.364515 | 1.607157 | 3.43E-05 | 0.000141 |
| AL139128  | 0.065761 | 0.21431  | 1.704397 | 7.06E-07 | 5.46E-06 |
| INHBA     | 1.020371 | 9.136558 | 3.162557 | 3.11E-12 | 1.40E-09 |
| PCDH10    | 0.726607 | 0.235735 | -1.62401 | 0.009573 | 0.017759 |
| AC112484  | 0.233302 | 1.072983 | 2.201355 | 0.000109 | 0.000374 |
| MTND2P4   | 0.084931 | 0.280093 | 1.721552 | 2.94E-06 | 1.79E-05 |
| AC092794  | 0.074832 | 0.26521  | 1.825414 | 0.008153 | 0.015474 |
| AC006329  | 1.098018 | 3.58072  | 1.705348 | 2.32E-05 | 0.000101 |
| PAX8      | 0.583495 | 1.690121 | 1.534335 | 7.15E-06 | 3.77E-05 |
| KLK4      | 0.024578 | 0.405705 | 4.045017 | 0.011315 | 0.020501 |

|           |          |          |          |          |          |
|-----------|----------|----------|----------|----------|----------|
| RNA5SP4   | 2.872002 | 8.469514 | 1.560222 | 0.015261 | 0.026564 |
| STIL      | 1.095445 | 4.53035  | 2.048106 | 4.45E-11 | 3.89E-09 |
| AC004830  | 0.126367 | 0.367819 | 1.541372 | 2.54E-05 | 0.000109 |
| MIR4292   | 1.557233 | 4.640236 | 1.575213 | 5.06E-07 | 4.14E-06 |
| SEZ6L2    | 8.478221 | 26.45326 | 1.641612 | 1.08E-06 | 7.80E-06 |
| AC009041  | 0.114574 | 0.448083 | 1.967482 | 1.95E-09 | 4.94E-08 |
| FMO2      | 6.928658 | 2.130056 | -1.70168 | 0.013727 | 0.024235 |
| SIX3      | 0.030478 | 0.67963  | 4.478889 | 7.41E-05 | 0.000269 |
| RNU6-10f  | 0.197454 | 1.311383 | 2.731498 | 2.43E-05 | 0.000105 |
| CXCL8     | 4.784959 | 46.47494 | 3.279874 | 1.29E-07 | 1.38E-06 |
| AC108676  | 0.040453 | 0.33265  | 3.039703 | 3.09E-08 | 4.34E-07 |
| RNU6-66f  | 0.131621 | 0.679136 | 2.367308 | 1.95E-06 | 1.26E-05 |
| AC244093  | 0.060911 | 0.217158 | 1.833961 | 4.56E-05 | 0.00018  |
| AC103691  | 0.857443 | 2.902852 | 1.759358 | 0.00012  | 0.000407 |
| LINC0169d | 0.055863 | 0.394914 | 2.821565 | 0.003442 | 0.00734  |
| TEDC2     | 0.623567 | 2.097307 | 1.74992  | 1.72E-09 | 4.49E-08 |
| KCNMA1    | 9.854625 | 3.268621 | -1.59212 | 0.000481 | 0.001337 |
| CKS1BP2   | 0.054893 | 0.230629 | 2.070875 | 1.45E-06 | 9.88E-06 |
| AHSG      | 0.042769 | 1.392268 | 5.024717 | 0.009178 | 0.017139 |
| ADAMTS9   | 0.708839 | 0.192435 | -1.88109 | 8.36E-06 | 4.31E-05 |
| AC009961  | 0.313486 | 0.908265 | 1.534711 | 0.001491 | 0.003566 |
| TRBV29Of  | 0.238781 | 0.798772 | 1.742092 | 4.82E-05 | 0.000188 |
| AL078459  | 0.093264 | 0.297737 | 1.674652 | 4.98E-09 | 1.02E-07 |
| TAF9P3    | 0.239548 | 0.728611 | 1.604836 | 4.40E-05 | 0.000174 |
| NEFL      | 1.975529 | 0.253757 | -2.96072 | 5.47E-05 | 0.000209 |
| PGM5-AS   | 11.68235 | 1.138625 | -3.35897 | 1.95E-08 | 3.00E-07 |
| PDLIM3    | 33.11552 | 10.65727 | -1.63567 | 0.001298 | 0.00316  |
| AP000525  | 0.027827 | 0.380803 | 3.77447  | 3.26E-08 | 4.55E-07 |
| AC246787  | 0.726036 | 0.247345 | -1.55352 | 0.022699 | 0.037522 |
| LRAT      | 0.763685 | 0.167889 | -2.18547 | 0.000107 | 0.000369 |
| HOXA10    | 0.515008 | 4.220221 | 3.034653 | 2.15E-08 | 3.23E-07 |
| LINC0225f | 0.029379 | 1.745223 | 5.892497 | 0.000187 | 0.000593 |
| AL021807  | 0.328138 | 1.137927 | 1.794034 | 0.000236 | 0.000725 |
| ABCA13    | 0.03706  | 0.236397 | 2.673268 | 2.11E-05 | 9.34E-05 |
| SNORD56   | 0.10603  | 0.39085  | 1.882143 | 0.010998 | 0.020005 |
| PPIAP3    | 0.144728 | 0.439918 | 1.603892 | 1.41E-07 | 1.47E-06 |
| GTF2IP13  | 0.74422  | 2.181237 | 1.551345 | 1.96E-07 | 1.92E-06 |
| AL078621  | 0.035812 | 0.252899 | 2.820045 | 0.013721 | 0.024235 |
| PAEP      | 0.052277 | 1.333909 | 4.673347 | 6.13E-06 | 3.33E-05 |
| RNU6-28f  | 0.129012 | 0.366443 | 1.50609  | 0.004181 | 0.008689 |
| AL132780  | 0.08414  | 0.297958 | 1.824247 | 9.71E-09 | 1.73E-07 |
| CORO6     | 1.132461 | 0.371291 | -1.60884 | 0.022021 | 0.036531 |
| CHODL     | 1.463478 | 0.255398 | -2.51858 | 8.43E-09 | 1.55E-07 |
| AC091390  | 0.218722 | 0.70869  | 1.696056 | 7.99E-06 | 4.15E-05 |
| MAGEA12   | 0.007085 | 3.916119 | 9.110534 | 1.35E-05 | 6.41E-05 |
| DLGAP1-1  | 0.351157 | 1.973526 | 2.490586 | 4.75E-11 | 3.96E-09 |
| PPIAP45   | 0.056887 | 0.349926 | 2.620879 | 7.85E-07 | 5.98E-06 |
| ARGFXP2   | 0.101521 | 0.347863 | 1.776743 | 1.03E-07 | 1.15E-06 |
| AL161891  | 0.121115 | 0.517964 | 2.096481 | 1.38E-11 | 2.40E-09 |
| ADAMTS1   | 24.82741 | 7.658505 | -1.6968  | 0.000104 | 0.00036  |
| MIR548N   | 0        | 0.316618 | Inf      | 4.65E-06 | 2.63E-05 |
| STPG4     | 0.054822 | 0.298394 | 2.444405 | 2.52E-08 | 3.65E-07 |
| SNORA5C   | 0.818363 | 2.468523 | 1.592835 | 8.49E-09 | 1.56E-07 |
| CDCA2     | 1.025327 | 4.132053 | 2.010775 | 8.54E-10 | 2.69E-08 |
| AC008147  | 0.308534 | 0.908624 | 1.558253 | 3.09E-06 | 1.86E-05 |
| HSD17B3   | 0.080402 | 0.273766 | 1.767633 | 0.000653 | 0.001739 |
| MIR17HG   | 0.123246 | 0.547173 | 2.150455 | 4.13E-08 | 5.48E-07 |
| AC022211  | 0.394735 | 1.239396 | 1.650682 | 3.86E-08 | 5.19E-07 |

|           |          |          |          |          |          |
|-----------|----------|----------|----------|----------|----------|
| ERCC6L    | 0.491441 | 1.702998 | 1.792986 | 1.44E-09 | 3.92E-08 |
| AC068580  | 0.039992 | 1.33716  | 5.063312 | 5.97E-08 | 7.33E-07 |
| AC009237  | 0.332771 | 1.016366 | 1.610817 | 2.52E-05 | 0.000109 |
| HSPB8     | 72.64623 | 13.57349 | -2.4201  | 2.47E-07 | 2.30E-06 |
| PAGE1     | 0.036822 | 1.423903 | 5.273125 | 0.003926 | 0.008226 |
| AL365181  | 1.78005  | 5.73971  | 1.68906  | 9.87E-06 | 4.94E-05 |
| MAGEA4    | 0.006467 | 5.940371 | 9.843313 | 0.000759 | 0.001984 |
| AC104534  | 1.920571 | 5.966383 | 1.635321 | 0.000321 | 0.000946 |
| CSRNP1    | 43.16812 | 13.82142 | -1.64306 | 3.46E-05 | 0.000142 |
| TRIB3     | 2.100385 | 10.59259 | 2.33433  | 4.19E-07 | 3.55E-06 |
| AL590133  | 0.097228 | 0.327521 | 1.752148 | 2.72E-07 | 2.50E-06 |
| RN7SKP7E  | 0.211135 | 0.603707 | 1.515681 | 0.000142 | 0.000471 |
| RN7SL614  | 0.111679 | 0.322519 | 1.530033 | 1.49E-05 | 6.96E-05 |
| DTL       | 1.289931 | 5.35591  | 2.053838 | 4.04E-11 | 3.65E-09 |
| RNU6-12C  | 0.11384  | 0.585779 | 2.363354 | 7.41E-06 | 3.89E-05 |
| CILP2     | 0.181221 | 1.341449 | 2.887971 | 2.30E-08 | 3.42E-07 |
| IGKV1OR1  | 1.267248 | 0.25231  | -2.32843 | 0.010363 | 0.019033 |
| PPIAP58   | 0.060981 | 0.266635 | 2.128442 | 3.37E-08 | 4.66E-07 |
| TIMELESS  | 2.584009 | 8.137409 | 1.654959 | 1.85E-10 | 8.91E-09 |
| GABRD     | 0.151276 | 1.426841 | 3.237566 | 2.50E-13 | 1.20E-09 |
| ASH1L-IT1 | 0.107059 | 0.326318 | 1.607878 | 2.43E-05 | 0.000105 |
| AC005550  | 0.603356 | 1.711907 | 1.504524 | 0.010833 | 0.019744 |
| PLP1      | 4.120889 | 0.429155 | -3.26338 | 7.57E-10 | 2.45E-08 |
| PYGM      | 4.809446 | 0.804979 | -2.57885 | 1.24E-06 | 8.69E-06 |
| NALT1     | 3.312091 | 0.70803  | -2.22586 | 0.000547 | 0.001494 |
| GPRC5A    | 20.51698 | 77.44882 | 1.916425 | 5.48E-08 | 6.86E-07 |
| C8orf88   | 7.268795 | 1.967678 | -1.88522 | 9.18E-05 | 0.000323 |
| SSTR5     | 0.133319 | 0.880997 | 2.724251 | 0.007011 | 0.013576 |
| LINC00983 | 3.018202 | 0.980757 | -1.62172 | 0.005057 | 0.01023  |
| CATSPERE  | 0.206221 | 0.930358 | 2.173593 | 7.15E-06 | 3.77E-05 |
| RNU6-833  | 0.079144 | 0.264944 | 1.743132 | 0.008401 | 0.015878 |
| AC244205  | 1.189282 | 0.271761 | -2.12968 | 0.000271 | 0.000817 |
| MIR644A   | 0.127189 | 0.546751 | 2.103909 | 6.24E-05 | 0.000233 |
| AC002128  | 0.202873 | 0.619608 | 1.61078  | 8.19E-09 | 1.52E-07 |
| AL928654  | 0.756202 | 2.196826 | 1.538577 | 8.62E-08 | 9.90E-07 |
| RNA5SP82  | 0.648923 | 1.855815 | 1.515935 | 6.81E-06 | 3.63E-05 |
| MAD2L1    | 1.633871 | 6.077862 | 1.89527  | 5.77E-10 | 1.98E-08 |
| AL078644  | 0.115208 | 0.330716 | 1.521349 | 6.52E-08 | 7.88E-07 |
| LINC01336 | 1.762144 | 0.431806 | -2.02888 | 4.40E-07 | 3.69E-06 |
| AC097639  | 0.077489 | 0.293428 | 1.920951 | 0.000724 | 0.001903 |
| AC073585  | 0.149193 | 0.808618 | 2.438274 | 7.80E-08 | 9.13E-07 |
| ZFPM2-A5  | 0.105701 | 0.657752 | 2.637555 | 0.000405 | 0.001152 |
| MIR613    | 0.07081  | 0.308043 | 2.121111 | 0.007445 | 0.0143   |
| NPM1P9    | 0.051664 | 0.219558 | 2.087371 | 2.64E-10 | 1.14E-08 |
| GRIK5     | 2.845921 | 0.912424 | -1.64112 | 0.001717 | 0.004013 |
| MYADML2   | 0.07128  | 0.33163  | 2.218006 | 0.00033  | 0.000968 |
| AC116348  | 0.078083 | 0.295908 | 1.922064 | 0.000159 | 0.000518 |
| CPNE7     | 0.726728 | 3.109432 | 2.097164 | 1.26E-05 | 6.06E-05 |
| IQGAP3    | 2.39024  | 10.62794 | 2.152635 | 2.97E-11 | 3.11E-09 |
| KPNA2     | 15.02783 | 43.45274 | 1.53181  | 2.19E-10 | 1.00E-08 |
| AC116562  | 0.052585 | 0.305187 | 2.536957 | 0.003072 | 0.006644 |
| RNU7-181  | 0.284854 | 1.681359 | 2.561331 | 6.94E-08 | 8.27E-07 |
| AL139099  | 0.094008 | 0.27151  | 1.530159 | 1.22E-05 | 5.89E-05 |
| RPL22P12  | 0.13617  | 0.419003 | 1.621548 | 4.53E-09 | 9.44E-08 |
| TBX15     | 0.100273 | 0.314896 | 1.650937 | 6.80E-05 | 0.000251 |
| ALG1L     | 0.735731 | 2.12955  | 1.533299 | 0.000926 | 0.00236  |
| LARGE2    | 3.808192 | 11.54648 | 1.600275 | 0.000836 | 0.002158 |
| SCNN1G    | 2.717228 | 0.474327 | -2.51818 | 2.48E-07 | 2.31E-06 |

|           |          |          |          |          |          |
|-----------|----------|----------|----------|----------|----------|
| MIR3125   | 0.146122 | 0.57003  | 1.963866 | 0.005935 | 0.01176  |
| MIR2116   | 0.263608 | 0.931477 | 1.821124 | 3.93E-05 | 0.000159 |
| AC005828  | 0.056787 | 0.257974 | 2.183599 | 2.90E-05 | 0.000122 |
| RNASE2    | 0.5934   | 1.855076 | 1.644402 | 2.30E-05 | 0.0001   |
| ARSE      | 2.137398 | 8.688991 | 2.023333 | 1.28E-06 | 8.96E-06 |
| BVES      | 5.117422 | 1.808655 | -1.5005  | 0.002312 | 0.005192 |
| LINC00891 | 0.112748 | 0.330705 | 1.552443 | 7.75E-05 | 0.000279 |
| TEAD4     | 4.100723 | 12.36822 | 1.592688 | 1.55E-11 | 2.48E-09 |
| OCLM      | 0.244178 | 0.708298 | 1.536423 | 8.39E-08 | 9.70E-07 |
| PURPL     | 0.030804 | 0.562775 | 4.191372 | 0.000193 | 0.000611 |
| SORBS1    | 52.35603 | 16.40544 | -1.67418 | 0.000133 | 0.000444 |
| LINC00624 | 0.065745 | 0.227832 | 1.793014 | 8.19E-09 | 1.52E-07 |
| AC108463  | 0.203732 | 0.92053  | 2.175791 | 3.28E-11 | 3.26E-09 |
| MIR1-1HC  | 1.49584  | 0.32842  | -2.18734 | 9.23E-06 | 4.68E-05 |
| RNU6-418  | 0.416671 | 1.224707 | 1.555456 | 1.09E-05 | 5.38E-05 |
| IGKV1OR2  | 3.458566 | 0.386815 | -3.16046 | 0.025782 | 0.041896 |
| PTPRU     | 2.573254 | 8.36623  | 1.700984 | 4.35E-05 | 0.000173 |
| AC091133  | 0.009079 | 0.273722 | 4.913964 | 6.98E-06 | 3.69E-05 |
| AC012676  | 0.339782 | 0.982082 | 1.531235 | 1.46E-08 | 2.36E-07 |
| AC008114  | 0.047325 | 0.29973  | 2.662978 | 5.32E-08 | 6.70E-07 |
| AC120498  | 0.104862 | 0.812401 | 2.953697 | 7.30E-05 | 0.000266 |
| GTF2IP5   | 0.144289 | 0.47819  | 1.728626 | 4.04E-07 | 3.44E-06 |
| RNU6-558  | 0.172581 | 0.747802 | 2.115386 | 0.001045 | 0.002619 |
| PITX1     | 68.18611 | 21.69115 | -1.65237 | 0.015463 | 0.026866 |
| AC106875  | 0.001288 | 0.304825 | 7.886878 | 3.00E-05 | 0.000126 |
| CYP27B1   | 0.302458 | 1.422092 | 2.233207 | 8.67E-10 | 2.70E-08 |
| CKB       | 177.9071 | 42.94383 | -2.0506  | 7.69E-07 | 5.88E-06 |
| AP001628  | 0.184987 | 0.775837 | 2.068331 | 1.71E-07 | 1.72E-06 |
| IGLV3-32  | 1.260702 | 0.175022 | -2.84862 | 0.006288 | 0.012357 |
| AC004584  | 0.078406 | 0.222963 | 1.507763 | 1.62E-05 | 7.49E-05 |
| MIR4713H  | 0.121739 | 0.578191 | 2.247754 | 1.28E-05 | 6.16E-05 |
| AL022322  | 0.394487 | 1.405781 | 1.833321 | 1.01E-09 | 2.99E-08 |
| AC005393  | 0.104376 | 0.313358 | 1.586017 | 0.000405 | 0.001151 |
| CHST4     | 0.097684 | 1.398105 | 3.839201 | 6.04E-06 | 3.28E-05 |
| MIR4698   | 0.111111 | 0.324607 | 1.546704 | 0.019227 | 0.032447 |
| CLCN4     | 0.718326 | 2.517339 | 1.80919  | 4.05E-06 | 2.35E-05 |
| HIST2H2B  | 0.270334 | 0.769259 | 1.508726 | 2.64E-06 | 1.64E-05 |
| POLR3GP1  | 0.125488 | 0.660539 | 2.396098 | 6.87E-06 | 3.65E-05 |
| LINC02101 | 0.221865 | 0.739744 | 1.737345 | 7.37E-06 | 3.87E-05 |
| ITGA11    | 1.482274 | 4.666057 | 1.654391 | 6.01E-07 | 4.77E-06 |
| APOA1     | 288.9574 | 46.55286 | -2.63392 | 0.026529 | 0.042888 |
| ARL4D     | 8.10838  | 2.434109 | -1.73602 | 5.18E-05 | 0.000199 |
| AC104365  | 0.04356  | 0.256226 | 2.55635  | 9.05E-05 | 0.00032  |
| ALOX12P2  | 0.076706 | 0.312583 | 2.026834 | 0.000274 | 0.000823 |
| TCAM1P    | 0.012802 | 0.310219 | 4.598853 | 3.27E-07 | 2.91E-06 |
| SNRPGP9   | 0.119171 | 0.4085   | 1.777299 | 4.70E-05 | 0.000184 |
| TGFB2-AS  | 0.454789 | 1.303763 | 1.519411 | 1.74E-05 | 7.93E-05 |
| AC009065  | 2.939635 | 8.458815 | 1.524819 | 8.74E-06 | 4.46E-05 |
| PGAM1P7   | 0.110954 | 0.428734 | 1.950114 | 8.90E-07 | 6.63E-06 |
| IGKV1OR-  | 1.61842  | 0.114633 | -3.8195  | 0.018412 | 0.031268 |
| AC117386  | 0.02756  | 0.293796 | 3.414167 | 1.80E-05 | 8.16E-05 |
| SDS       | 0.922331 | 4.86496  | 2.399071 | 3.82E-10 | 1.47E-08 |
| IGKV1OR2  | 3.121301 | 0.527425 | -2.56511 | 0.017994 | 0.030633 |
| FARSA-AS  | 0.124429 | 0.401292 | 1.689332 | 7.50E-07 | 5.76E-06 |
| OTC       | 14.58935 | 2.919623 | -2.32106 | 0.027612 | 0.044461 |
| MAGEA3    | 0.017298 | 7.941312 | 8.842635 | 6.64E-05 | 0.000245 |
| ADRB2     | 2.161302 | 0.620559 | -1.80026 | 1.71E-10 | 8.37E-09 |
| CTHRC1    | 3.195868 | 25.5544  | 2.999292 | 3.50E-12 | 1.42E-09 |

|          |          |          |          |          |          |
|----------|----------|----------|----------|----------|----------|
| TDRD5    | 0.095348 | 0.828331 | 3.11894  | 3.07E-06 | 1.85E-05 |
| PCDHB8   | 0.232525 | 0.961162 | 2.047394 | 0.001088 | 0.002712 |
| TIGD1    | 0.680284 | 1.964852 | 1.530211 | 7.54E-11 | 5.21E-09 |
| RNA5SP21 | 0.179696 | 0.592689 | 1.721716 | 0.00012  | 0.000407 |
| AC005534 | 0.046142 | 0.277916 | 2.590504 | 6.99E-09 | 1.34E-07 |
| ERFE     | 0.134262 | 0.762851 | 2.506355 | 6.17E-09 | 1.21E-07 |
| Z97200.1 | 0.110733 | 0.32675  | 1.561106 | 0.00043  | 0.001214 |
| SAGE1    | 0.003641 | 0.444825 | 6.93289  | 0.000325 | 0.000955 |
| RNU6-856 | 0.275007 | 0.846958 | 1.622823 | 1.46E-05 | 6.86E-05 |
| AK4P3    | 0.076682 | 0.284288 | 1.890404 | 0.000649 | 0.00173  |
| CHTF18   | 1.272319 | 3.638506 | 1.515886 | 1.62E-09 | 4.29E-08 |
| TLX1     | 0.249651 | 1.414605 | 2.502413 | 2.84E-05 | 0.00012  |
| SLC16A9  | 2.800412 | 0.874761 | -1.67868 | 0.00016  | 0.000519 |
| BEND5    | 2.096263 | 0.73847  | -1.50521 | 9.87E-06 | 4.94E-05 |
| CCNB2    | 4.643946 | 13.44182 | 1.533305 | 4.43E-09 | 9.27E-08 |
| DDX11-A' | 0.100261 | 0.33178  | 1.726464 | 5.58E-09 | 1.12E-07 |
| NALCN    | 0.098009 | 0.29006  | 1.565369 | 0.005565 | 0.011121 |
| ITGAX    | 1.242637 | 4.056426 | 1.706804 | 1.52E-08 | 2.44E-07 |
| TRAJ36   | 0.062504 | 0.483457 | 2.951363 | 0.001055 | 0.002641 |
| WDHD1    | 0.854509 | 2.629966 | 1.621876 | 8.56E-11 | 5.65E-09 |
| CEP72    | 0.912397 | 3.272265 | 1.842556 | 9.12E-11 | 5.85E-09 |
| POLR2KP1 | 0.159216 | 0.560808 | 1.816517 | 3.80E-05 | 0.000154 |
| CDC25C   | 0.858895 | 2.678612 | 1.640932 | 9.31E-09 | 1.68E-07 |
| NPPC     | 2.565739 | 0.404066 | -2.66671 | 2.28E-07 | 2.16E-06 |
| CDC7     | 0.979051 | 3.416978 | 1.803264 | 1.09E-10 | 6.42E-09 |
| AL512444 | 0.048335 | 0.211682 | 2.13075  | 2.41E-05 | 0.000105 |
| SLC1A5   | 16.43892 | 50.15324 | 1.609228 | 5.34E-09 | 1.08E-07 |
| UAP1L1   | 1.692701 | 4.825666 | 1.511401 | 5.19E-09 | 1.06E-07 |
| LINC0152 | 0.054222 | 0.835154 | 3.94509  | 0.001371 | 0.003314 |
| AP001065 | 1.192452 | 0.368038 | -1.69601 | 0.004453 | 0.009163 |
| CASC19   | 0.536379 | 2.952225 | 2.460479 | 6.53E-06 | 3.50E-05 |
| AC130456 | 0.065514 | 0.270111 | 2.043668 | 5.10E-07 | 4.18E-06 |
| KCNE2    | 51.78906 | 2.91177  | -4.15268 | 0.000545 | 0.001488 |
| MYO3B    | 0.047046 | 0.221604 | 2.235846 | 0.020413 | 0.034203 |
| FGF3     | 0.0215   | 2.255139 | 6.712726 | 0.000347 | 0.001009 |
| AIFM3    | 0.125802 | 0.366233 | 1.541611 | 5.56E-05 | 0.000212 |
| MYZAP    | 3.460845 | 1.065344 | -1.6998  | 1.79E-08 | 2.79E-07 |
| HASPIN   | 0.858734 | 2.798423 | 1.704331 | 4.07E-09 | 8.71E-08 |
| MCM2     | 4.311475 | 15.02134 | 1.80076  | 9.42E-11 | 5.97E-09 |
| RNA5SP47 | 0.084651 | 0.307977 | 1.863227 | 0.000213 | 0.000664 |
| PGA4     | 8.174651 | 0.458845 | -4.15508 | 0.000195 | 0.000617 |
| CDK6     | 3.298799 | 14.20317 | 2.1062   | 9.17E-09 | 1.66E-07 |
| AC138409 | 0.268114 | 0.85228  | 1.668481 | 2.14E-07 | 2.06E-06 |
| AC007619 | 0.076064 | 0.275924 | 1.858985 | 5.13E-06 | 2.86E-05 |
| AC004231 | 0.020233 | 0.387514 | 4.259499 | 0.000768 | 0.002004 |
| NTN1     | 15.54856 | 5.361728 | -1.53601 | 9.76E-06 | 4.90E-05 |
| MYLK     | 59.69017 | 19.1797  | -1.63791 | 0.001621 | 0.003821 |
| FZD2     | 1.88611  | 5.462008 | 1.534018 | 4.76E-06 | 2.69E-05 |
| RNU1-122 | 0.115185 | 0.402824 | 1.806192 | 0.00015  | 0.000492 |
| ZBTB16   | 4.107073 | 0.895589 | -2.1972  | 1.08E-07 | 1.19E-06 |
| CST2     | 0.528435 | 6.66205  | 3.656168 | 1.91E-09 | 4.85E-08 |
| RFC3     | 2.919801 | 11.22366 | 1.942601 | 2.62E-12 | 1.40E-09 |
| BCHE     | 5.49851  | 1.100923 | -2.32033 | 5.15E-06 | 2.87E-05 |
| OR2B6    | 0.030238 | 0.284709 | 3.235044 | 1.57E-07 | 1.61E-06 |
| AC010627 | 0.049116 | 0.216764 | 2.141858 | 0.00234  | 0.005247 |
| PRC1     | 2.764095 | 10.07079 | 1.865298 | 1.33E-10 | 7.32E-09 |
| AC022973 | 0.190221 | 0.717762 | 1.915831 | 7.40E-08 | 8.73E-07 |
| AL162595 | 0.224438 | 0.749983 | 1.740539 | 2.33E-10 | 1.04E-08 |



|          |          |          |          |          |          |
|----------|----------|----------|----------|----------|----------|
| AC005089 | 0.122338 | 0.599103 | 2.291926 | 9.08E-06 | 4.61E-05 |
| C3P1     | 0.036472 | 0.465849 | 3.674982 | 4.10E-08 | 5.45E-07 |
| YES1P1   | 0.075877 | 0.228472 | 1.590279 | 1.53E-06 | 1.04E-05 |
| HOXA13   | 0.637903 | 4.908899 | 2.94399  | 1.79E-08 | 2.79E-07 |
| AC019155 | 0.012304 | 0.265301 | 4.430476 | 0.000653 | 0.00174  |
| INA      | 1.302341 | 0.321585 | -2.01784 | 8.59E-07 | 6.44E-06 |
| PI16     | 27.0943  | 3.208093 | -3.0782  | 6.17E-09 | 1.21E-07 |
| RDM1     | 0.218143 | 0.773316 | 1.825787 | 7.16E-08 | 8.48E-07 |
| ELOVL3   | 0.117404 | 0.396251 | 1.754931 | 2.35E-05 | 0.000102 |
| PRSS33   | 0.089951 | 1.377865 | 3.937154 | 6.27E-05 | 0.000234 |
| ABI3BP   | 20.32698 | 4.307913 | -2.23833 | 4.17E-05 | 0.000167 |
| RNASEH1  | 0.013944 | 0.239167 | 4.100255 | 0.001327 | 0.003224 |
| RN7SL809 | 0.159197 | 0.643256 | 2.014582 | 2.71E-08 | 3.89E-07 |
| AL158825 | 0.305301 | 1.039924 | 1.768176 | 8.50E-06 | 4.37E-05 |
| EPHB2    | 1.853803 | 8.761793 | 2.240738 | 1.05E-07 | 1.17E-06 |
| AL161729 | 0.15045  | 0.488669 | 1.699572 | 1.07E-05 | 5.30E-05 |
| PADI2    | 1.112961 | 4.244159 | 1.931075 | 0.000197 | 0.000622 |
| PVT1     | 0.84144  | 3.55384  | 2.078447 | 2.85E-10 | 1.20E-08 |
| AC116407 | 1.030746 | 0.329982 | -1.64323 | 0.008743 | 0.016421 |
| AL021331 | 0.051417 | 0.218267 | 2.085775 | 0.000482 | 0.001338 |
| RN7SL449 | 0.073654 | 0.212539 | 1.528889 | 0.000237 | 0.00073  |
| HOXC9    | 0.121671 | 2.340379 | 4.265683 | 6.69E-12 | 1.99E-09 |
| GRIK3    | 0.920802 | 0.203877 | -2.17519 | 3.41E-06 | 2.02E-05 |
| PCP2     | 0.176665 | 0.502195 | 1.507228 | 0.00032  | 0.000942 |
| AL161729 | 0.094348 | 0.422204 | 2.161877 | 1.89E-05 | 8.51E-05 |
| ROS1     | 0.017069 | 0.28818  | 4.077553 | 3.95E-06 | 2.30E-05 |
| PCMTD1P  | 0.063739 | 0.300162 | 2.235497 | 1.38E-05 | 6.55E-05 |
| RNU6-123 | 0.102873 | 1.6464   | 4.000376 | 0.000122 | 0.000411 |
| MMP10    | 0.205965 | 2.625911 | 3.672345 | 3.68E-07 | 3.19E-06 |
| MYH7B    | 0.21136  | 0.838678 | 1.988417 | 0.000151 | 0.000495 |
| TCEAL7   | 4.489326 | 1.569667 | -1.51604 | 0.002084 | 0.004749 |
| PLPPR4   | 0.339998 | 1.028329 | 1.596705 | 5.79E-05 | 0.000219 |
| HOXA10-  | 0.086499 | 0.677001 | 2.968399 | 3.92E-08 | 5.25E-07 |
| RPL39P39 | 0.108593 | 0.330373 | 1.605159 | 0.000156 | 0.000509 |
| SPP1     | 11.78024 | 85.34403 | 2.856921 | 3.33E-08 | 4.61E-07 |
| MIR3153  | 0.176181 | 0.992218 | 2.4936   | 1.28E-06 | 8.98E-06 |
| KIF26B   | 0.433037 | 2.63746  | 2.606587 | 4.24E-11 | 3.77E-09 |
| AL133410 | 0.215634 | 0.765851 | 1.828476 | 6.41E-10 | 2.15E-08 |
| AMH      | 0.259317 | 1.867736 | 2.848503 | 2.46E-06 | 1.54E-05 |
| ATP5MC1  | 0.230739 | 1.140973 | 2.305929 | 4.87E-09 | 1.00E-07 |
| MPPED2   | 0.520934 | 0.183327 | -1.50668 | 0.009573 | 0.017759 |
| RNU6-322 | 0.459203 | 1.460001 | 1.668766 | 0.000194 | 0.000615 |
| TRPM5    | 0.123062 | 0.386275 | 1.650248 | 0.009571 | 0.017759 |
| DUSP9    | 0.046419 | 0.899999 | 4.277152 | 0.000201 | 0.000632 |
| MIR3133  | 0.045323 | 0.283149 | 2.643235 | 0.000535 | 0.001466 |
| PROC     | 0.423036 | 2.01113  | 2.249153 | 0.000223 | 0.00069  |
| WDR62    | 0.490054 | 2.104542 | 2.102493 | 8.04E-11 | 5.40E-09 |
| SCGB2A1  | 17.5311  | 2.458738 | -2.83393 | 0.020239 | 0.033974 |
| AP002784 | 0.011772 | 0.643771 | 5.773087 | 8.35E-08 | 9.67E-07 |
| AC091179 | 0.033601 | 0.46853  | 3.801579 | 1.36E-05 | 6.46E-05 |
| MIR5094  | 0.466845 | 1.780504 | 1.931271 | 1.42E-05 | 6.69E-05 |
| MSLNL    | 0.05716  | 0.441268 | 2.948576 | 6.58E-07 | 5.15E-06 |
| RNF43    | 3.01026  | 10.028   | 1.736074 | 4.39E-05 | 0.000174 |
| AL390729 | 0.418204 | 1.308287 | 1.645399 | 2.30E-05 | 0.0001   |
| AC087385 | 0.298774 | 0.918646 | 1.620453 | 3.14E-06 | 1.89E-05 |
| DEPDC1B  | 1.220338 | 4.917848 | 2.010747 | 4.25E-10 | 1.60E-08 |
| LRFN4    | 4.286068 | 15.94697 | 1.895556 | 6.23E-11 | 4.54E-09 |
| AL590438 | 0.064709 | 0.307144 | 2.246873 | 0.000115 | 0.000392 |

|          |          |          |          |          |          |
|----------|----------|----------|----------|----------|----------|
| MIR6832  | 0.117619 | 0.41625  | 1.823328 | 0.00205  | 0.004683 |
| IGKV1OR2 | 3.735814 | 0.394099 | -3.24479 | 0.010081 | 0.018579 |
| AC106028 | 0.090533 | 0.377906 | 2.061507 | 4.30E-08 | 5.67E-07 |
| RNU6-117 | 0.150709 | 0.472026 | 1.647104 | 6.17E-05 | 0.000231 |
| GKN2     | 955.299  | 45.69557 | -4.38583 | 0.000224 | 0.000695 |
| GFY      | 0.010135 | 0.364856 | 5.169871 | 0.000181 | 0.000578 |
| GPR158   | 0.10767  | 0.611573 | 2.505913 | 0.000479 | 0.001332 |
| ESM1     | 0.158903 | 2.937778 | 4.208508 | 1.36E-13 | 1.20E-09 |
| AC025423 | 0.109626 | 0.428017 | 1.965077 | 1.95E-06 | 1.26E-05 |
| CDCA7    | 5.681787 | 19.00116 | 1.741671 | 1.15E-07 | 1.26E-06 |
| SLC18A3  | 1.102896 | 0.172205 | -2.6791  | 7.40E-05 | 0.000269 |
| AC016949 | 0.366326 | 1.081425 | 1.561732 | 1.11E-07 | 1.22E-06 |
| MAGEA8   | 0.013203 | 0.247901 | 4.230882 | 0.016474 | 0.028402 |
| RHOB     | 423.8236 | 137.7717 | -1.62118 | 0.006119 | 0.012071 |
| AC022973 | 0.095364 | 0.470866 | 2.303796 | 2.51E-08 | 3.65E-07 |
| KIF4A    | 1.407868 | 5.9895   | 2.088924 | 9.27E-11 | 5.91E-09 |
| AC017006 | 0.101093 | 0.294494 | 1.542554 | 0.000169 | 0.000542 |
| APOBEC2  | 4.311919 | 1.181667 | -1.86751 | 5.09E-06 | 2.85E-05 |
| NPTX1    | 5.24862  | 1.212113 | -2.11441 | 0.003138 | 0.006762 |
| AL365181 | 0.35141  | 1.566426 | 2.156249 | 1.56E-05 | 7.24E-05 |
| AC130456 | 0.752911 | 2.366913 | 1.652455 | 3.11E-06 | 1.87E-05 |
| CCR8     | 0.161647 | 0.597531 | 1.886166 | 1.61E-07 | 1.65E-06 |
| AC079684 | 0.173824 | 0.682662 | 1.973547 | 8.86E-09 | 1.61E-07 |
| AP003696 | 0.061581 | 0.22098  | 1.843368 | 9.57E-05 | 0.000334 |
| OSTCP8   | 0.043876 | 0.289164 | 2.720369 | 2.06E-09 | 5.13E-08 |
| C5orf46  | 0.128164 | 0.48669  | 1.925012 | 4.30E-07 | 3.62E-06 |
| TPM3P9   | 0.978872 | 2.959142 | 1.595986 | 3.28E-10 | 1.31E-08 |
| UCA1     | 1.330109 | 12.88099 | 3.275628 | 0.000918 | 0.002342 |
| AC087241 | 0.072011 | 0.227922 | 1.662259 | 0.001045 | 0.002619 |
| MIR3198- | 0.157687 | 0.661552 | 2.068792 | 2.50E-06 | 1.57E-05 |
| AC087491 | 0.38862  | 1.12594  | 1.534699 | 0.024372 | 0.039913 |
| RDH12    | 4.895343 | 0.766843 | -2.67441 | 7.99E-06 | 4.15E-05 |
| IGLV3-24 | 1.254585 | 0.200884 | -2.64277 | 0.024646 | 0.040282 |
| GJA3     | 0.121528 | 0.423077 | 1.799629 | 0.00049  | 0.001356 |
| DCSTAMP  | 0.051903 | 0.289541 | 2.479879 | 3.13E-10 | 1.27E-08 |
| SATB2    | 0.401326 | 1.372129 | 1.773569 | 4.30E-07 | 3.62E-06 |
| ADRB3    | 0.652747 | 0.177144 | -1.8816  | 2.79E-06 | 1.72E-05 |
| SNHG4    | 0.577572 | 1.65253  | 1.516604 | 8.55E-09 | 1.56E-07 |
| COL3A1   | 78.37401 | 350.0488 | 2.159109 | 1.36E-09 | 3.75E-08 |
| MYBL2    | 8.752795 | 39.00175 | 2.155723 | 9.77E-10 | 2.95E-08 |
| IL17RB   | 2.770569 | 8.772599 | 1.662822 | 1.12E-08 | 1.92E-07 |
| MTTP     | 28.46248 | 1.576223 | -4.17452 | 0.003744 | 0.007895 |
| RNU6-571 | 0.06516  | 0.210166 | 1.689469 | 0.003051 | 0.006606 |
| TRIM31-A | 0.565164 | 2.189446 | 1.953824 | 1.98E-07 | 1.95E-06 |
| AC113143 | 0.313292 | 1.145011 | 1.86978  | 5.06E-06 | 2.83E-05 |
| HMGB3    | 3.368048 | 12.66033 | 1.91033  | 6.64E-11 | 4.79E-09 |
| RNY3P12  | 0.065351 | 0.303023 | 2.213158 | 0.000937 | 0.002385 |
| TRABD2A  | 0.862917 | 3.181757 | 1.88253  | 1.50E-05 | 6.98E-05 |
| AL391095 | 0.082603 | 0.235746 | 1.512962 | 6.98E-05 | 0.000256 |
| MIR4728  | 0.45091  | 2.965784 | 2.717501 | 0.001356 | 0.003283 |
| AC022144 | 0.147179 | 0.978907 | 2.733597 | 5.99E-09 | 1.18E-07 |
| AC004678 | 0.096029 | 0.300538 | 1.646008 | 1.67E-08 | 2.63E-07 |
| CCDC150  | 0.057107 | 0.321123 | 2.491384 | 3.38E-11 | 3.29E-09 |
| CFL2     | 17.47198 | 5.88425  | -1.57011 | 0.002904 | 0.006325 |
| RNU6-104 | 0.258019 | 0.787729 | 1.610222 | 0.000356 | 0.001032 |
| NKX6-2   | 9.767817 | 0.742919 | -3.71676 | 6.11E-07 | 4.83E-06 |
| AL096828 | 0.130714 | 0.559334 | 2.097293 | 9.96E-08 | 1.12E-06 |
| SULF1    | 5.554116 | 27.51268 | 2.308468 | 2.79E-09 | 6.50E-08 |

|          |          |          |          |          |          |
|----------|----------|----------|----------|----------|----------|
| HMGB2P1  | 0.065315 | 0.257105 | 1.976873 | 4.75E-06 | 2.69E-05 |
| SLC6A7   | 0.061845 | 0.254552 | 2.041226 | 7.08E-05 | 0.000259 |
| AL121994 | 0.088763 | 0.28324  | 1.673998 | 7.18E-06 | 3.78E-05 |
| FOXS1    | 0.72849  | 4.479458 | 2.620343 | 1.71E-11 | 2.48E-09 |
| FRAS1    | 0.572944 | 1.849356 | 1.690556 | 0.006164 | 0.012146 |
| LINC0034 | 0.244128 | 0.787673 | 1.689961 | 1.41E-06 | 9.68E-06 |
| RN7SL481 | 0.195734 | 0.554536 | 1.502391 | 7.01E-06 | 3.71E-05 |
| LY6H     | 1.405981 | 0.374634 | -1.90802 | 5.15E-06 | 2.87E-05 |
| AC007991 | 0.113665 | 0.775594 | 2.770514 | 3.35E-06 | 1.99E-05 |
| LINC0060 | 0.097406 | 0.419039 | 2.105006 | 0.018421 | 0.031272 |
| LINC0114 | 0.034465 | 0.355411 | 3.366265 | 9.14E-08 | 1.04E-06 |
| CRYAB    | 39.30434 | 8.426193 | -2.22174 | 3.33E-08 | 4.61E-07 |
| AC008083 | 0.050716 | 0.226774 | 2.160735 | 0.000119 | 0.000403 |
| LINC0161 | 0.082862 | 0.419315 | 2.339251 | 5.42E-09 | 1.10E-07 |
| RPL31P50 | 0.012985 | 0.221525 | 4.092561 | 2.24E-06 | 1.42E-05 |
| UCN2     | 0.079133 | 0.450011 | 2.507612 | 3.75E-08 | 5.07E-07 |
| LINC0138 | 0.368772 | 1.541502 | 2.063535 | 7.53E-09 | 1.42E-07 |
| AL512430 | 0.103913 | 0.310792 | 1.580575 | 0.00011  | 0.000378 |
| SCN8A    | 0.139218 | 0.488135 | 1.809933 | 0.000942 | 0.002393 |
| RCAN2    | 22.16766 | 7.443847 | -1.57434 | 2.78E-05 | 0.000118 |
| AC008870 | 0.488903 | 1.935429 | 1.985033 | 5.50E-05 | 0.00021  |
| AC125257 | 2.299135 | 6.583383 | 1.517738 | 1.85E-10 | 8.91E-09 |
| MYOM3    | 0.140448 | 1.139566 | 3.020377 | 1.57E-06 | 1.06E-05 |
| XRCC2    | 0.384139 | 2.058059 | 2.421586 | 2.00E-12 | 1.40E-09 |
| VPS9D1-A | 1.776068 | 6.991938 | 1.977005 | 2.40E-08 | 3.51E-07 |
| TMEM100  | 7.550688 | 1.227916 | -2.6204  | 9.45E-08 | 1.07E-06 |
| COL11A1  | 0.590633 | 3.532648 | 2.580415 | 3.49E-10 | 1.37E-08 |
| AL596247 | 0.230635 | 0.671362 | 1.541478 | 0.000126 | 0.000422 |
| SPOCD1   | 0.142534 | 0.513756 | 1.849773 | 5.06E-08 | 6.44E-07 |
| AL121829 | 0.066843 | 0.210418 | 1.654419 | 0.001515 | 0.003612 |
| AC090695 | 0.088188 | 0.251126 | 1.509763 | 4.81E-06 | 2.71E-05 |
| RNU6-40  | 0.10716  | 0.581847 | 2.440868 | 0.000302 | 0.000898 |
| SNORD12  | 0.120001 | 0.53172  | 2.147617 | 0.000102 | 0.000353 |
| AL356740 | 0.084985 | 0.744782 | 3.131533 | 4.52E-06 | 2.58E-05 |
| AL109615 | 0.157143 | 1.387151 | 3.141973 | 8.67E-10 | 2.70E-08 |
| AL355472 | 0.056705 | 0.223192 | 1.976742 | 0.001145 | 0.002836 |
| RNU6-19  | 0.383661 | 1.512212 | 1.978758 | 7.64E-07 | 5.85E-06 |
| SNRPCP1  | 0.052495 | 0.293727 | 2.484222 | 0.000214 | 0.000668 |
| MTHFD1L  | 1.703095 | 6.504808 | 1.933348 | 6.26E-13 | 1.31E-09 |
| C4BPB    | 1.241685 | 3.805999 | 1.615975 | 0.00107  | 0.002672 |
| PRSS30P  | 0.080444 | 0.367694 | 2.192456 | 2.58E-06 | 1.60E-05 |
| DCAF13   | 2.074796 | 5.921706 | 1.513043 | 3.22E-12 | 1.40E-09 |
| HAMP     | 0.092722 | 0.373319 | 2.009418 | 1.61E-06 | 1.08E-05 |
| DDN      | 0.075685 | 0.260747 | 1.784577 | 0.02987  | 0.047551 |
| COL12A1  | 7.932074 | 25.57914 | 1.689198 | 1.74E-07 | 1.75E-06 |
| AC124944 | 0.143236 | 0.548697 | 1.93762  | 2.68E-08 | 3.85E-07 |
| AC006480 | 0.068513 | 0.261519 | 1.932466 | 4.49E-07 | 3.75E-06 |
| SYNGR4   | 0.104677 | 1.326981 | 3.664128 | 1.32E-05 | 6.30E-05 |
| AC005993 | 0.025995 | 0.714241 | 4.780093 | 6.61E-06 | 3.53E-05 |
| TCAP     | 0.258899 | 0.885119 | 1.773483 | 0.000741 | 0.001942 |
| AL669831 | 0.087641 | 0.258511 | 1.560553 | 1.90E-08 | 2.92E-07 |
| ENC1     | 5.648648 | 24.20413 | 2.099276 | 1.95E-11 | 2.63E-09 |
| AL035420 | 0.113039 | 0.383257 | 1.761487 | 0.000254 | 0.000773 |
| AC007038 | 0.394611 | 1.182227 | 1.583003 | 9.08E-08 | 1.03E-06 |
| COL4A6   | 5.87453  | 0.90611  | -2.69672 | 1.94E-06 | 1.26E-05 |
| TENT5B   | 19.04316 | 3.734129 | -2.35043 | 0.003604 | 0.007635 |
| MIR4729  | 0.070972 | 0.366017 | 2.366584 | 0.002739 | 0.006017 |
| SAPCD1   | 0.081899 | 0.403996 | 2.30243  | 2.27E-08 | 3.38E-07 |

|           |          |          |          |          |          |
|-----------|----------|----------|----------|----------|----------|
| AC068790  | 0.151356 | 0.435441 | 1.524537 | 7.10E-07 | 5.49E-06 |
| LINC01050 | 0.00711  | 0.233041 | 5.034567 | 1.18E-10 | 6.69E-09 |
| AC073107  | 0.396296 | 1.284439 | 1.696489 | 1.21E-07 | 1.31E-06 |
| FAM227A   | 0.075898 | 0.262714 | 1.79135  | 1.87E-08 | 2.88E-07 |
| SYPL1P2   | 0.095184 | 0.358141 | 1.911734 | 2.24E-07 | 2.14E-06 |
| PUS7      | 1.881061 | 6.471144 | 1.782474 | 2.62E-12 | 1.40E-09 |
| FOXD1     | 0.640338 | 2.680415 | 2.06555  | 0.018548 | 0.03145  |
| CDIPTOSF  | 0.109026 | 0.434656 | 1.995204 | 0.000586 | 0.001587 |
| CRTAC1    | 1.478078 | 0.466478 | -1.66384 | 1.65E-05 | 7.57E-05 |
| LINC02060 | 0.087813 | 0.266241 | 1.60023  | 0.000526 | 0.001443 |
| MIR4284   | 0.142785 | 0.547606 | 1.939292 | 0.000711 | 0.001875 |
| LEMD1     | 0.20735  | 1.183783 | 2.513267 | 1.48E-08 | 2.39E-07 |
| PRAME     | 0.041922 | 4.00366  | 6.577468 | 2.01E-07 | 1.96E-06 |
| AURKA     | 4.170273 | 14.56164 | 1.803959 | 1.96E-09 | 4.94E-08 |
| AC010547  | 0.053179 | 1.188017 | 4.48156  | 8.90E-06 | 4.53E-05 |
| MIR567    | 0.065474 | 0.343391 | 2.390865 | 0.000638 | 0.001706 |
| KCNMB1    | 16.92111 | 4.468655 | -1.92091 | 6.46E-06 | 3.47E-05 |
| RNU6-562  | 0.050575 | 0.337703 | 2.739253 | 0.000638 | 0.001706 |
| CABP4     | 0.162766 | 0.488922 | 1.586805 | 0.01843  | 0.031272 |
| LINC01970 | 0.113514 | 0.451611 | 1.992209 | 1.18E-07 | 1.28E-06 |
| REP15     | 4.273598 | 0.894394 | -2.25647 | 0.008294 | 0.015717 |
| LYNX1     | 16.27182 | 4.711442 | -1.78813 | 0.001017 | 0.002555 |
| MIR3939   | 0.145593 | 0.58563  | 2.008051 | 7.14E-05 | 0.000261 |
| XPO5      | 3.472317 | 9.837678 | 1.502419 | 6.86E-12 | 1.99E-09 |
| CPA2      | 21.15958 | 2.40273  | -3.13856 | 0.010578 | 0.019353 |
| CSF2      | 0.058713 | 0.997896 | 4.087149 | 1.50E-08 | 2.42E-07 |
| EPOP      | 0.991978 | 3.246855 | 1.710662 | 1.67E-06 | 1.11E-05 |
| AC044840  | 0.073084 | 0.284466 | 1.960632 | 6.10E-06 | 3.32E-05 |
| HIST1H3J  | 0.053947 | 0.257608 | 2.255568 | 7.42E-08 | 8.75E-07 |
| RPS26P45  | 0.056742 | 0.288677 | 2.346971 | 8.05E-06 | 4.17E-05 |
| AL136221  | 0.245235 | 0.720203 | 1.554239 | 5.57E-06 | 3.08E-05 |
| CNTNAP2   | 0.385791 | 1.987401 | 2.364992 | 0.001595 | 0.00377  |
| CCKBR     | 4.145551 | 0.505729 | -3.03513 | 2.87E-07 | 2.61E-06 |
| AC005021  | 0.051587 | 0.348987 | 2.75808  | 4.71E-07 | 3.90E-06 |
| RNU6-127  | 0.066205 | 0.246401 | 1.895987 | 0.000809 | 0.002099 |
| AC069499  | 0.226473 | 0.946434 | 2.06316  | 2.06E-10 | 9.58E-09 |
| TAS2R4    | 0.078442 | 0.227735 | 1.537655 | 2.80E-06 | 1.72E-05 |
| AC092112  | 0.124174 | 1.157812 | 3.22097  | 6.29E-05 | 0.000234 |
| TSLP      | 0.751837 | 0.191789 | -1.9709  | 5.06E-07 | 4.14E-06 |
| MIR4427   | 0.17586  | 1.029368 | 2.549259 | 5.39E-05 | 0.000206 |
| SKAP1-AS  | 0.138243 | 0.403161 | 1.54415  | 0.000151 | 0.000495 |
| AC131532  | 0.016865 | 0.489721 | 4.859817 | 0.00057  | 0.001547 |
| AC015853  | 0.081826 | 0.284108 | 1.795806 | 5.44E-08 | 6.82E-07 |
| SNORA80   | 0.211034 | 0.618595 | 1.551523 | 2.89E-05 | 0.000122 |
| LBX2      | 0.232325 | 0.950405 | 2.032399 | 4.50E-09 | 9.38E-08 |
| MATN3     | 0.323093 | 2.41404  | 2.90143  | 3.66E-08 | 4.96E-07 |
| FGL2      | 65.06057 | 14.33433 | -2.18231 | 0.000174 | 0.000558 |
| EDN2      | 2.576088 | 0.701798 | -1.87605 | 0.000391 | 0.001118 |
| Z69720.2  | 0.090986 | 0.284614 | 1.645289 | 8.11E-05 | 0.000291 |
| AGRN      | 11.79613 | 38.32951 | 1.700142 | 9.87E-11 | 6.05E-09 |
| TCEAL2    | 11.44407 | 2.300866 | -2.31435 | 3.25E-05 | 0.000135 |
| AC245100  | 0.117394 | 0.373253 | 1.668794 | 4.70E-08 | 6.09E-07 |
| NUDT19P   | 0.071692 | 0.26199  | 1.869635 | 0.000903 | 0.002308 |
| C2orf15   | 0.612502 | 1.755681 | 1.519243 | 1.80E-09 | 4.63E-08 |
| SIX1      | 0.146921 | 0.841131 | 2.517288 | 9.98E-06 | 4.99E-05 |
| ASB9P1    | 0.177961 | 0.509845 | 1.518498 | 2.35E-06 | 1.48E-05 |
| GFRA1     | 6.38028  | 1.74128  | -1.87347 | 3.00E-06 | 1.82E-05 |
| C8orf31   | 0.430499 | 1.938184 | 2.170625 | 3.18E-07 | 2.84E-06 |

|          |          |          |          |          |          |
|----------|----------|----------|----------|----------|----------|
| AC087277 | 0.042526 | 0.285298 | 2.746061 | 0.000588 | 0.001591 |
| A2M-AS1  | 1.43037  | 0.497709 | -1.52301 | 0.006391 | 0.01253  |
| TERT     | 0.075316 | 0.503376 | 2.740602 | 8.08E-07 | 6.12E-06 |
| SELENOO  | 0.040447 | 2.228605 | 5.783981 | 0.000204 | 0.000642 |
| DNASE1L3 | 4.536189 | 0.998975 | -2.18296 | 1.34E-06 | 9.32E-06 |
| RNU6-13C | 0.072649 | 0.379502 | 2.38509  | 5.06E-05 | 0.000196 |
| EVX1     | 0.023466 | 0.643071 | 4.776309 | 1.61E-07 | 1.65E-06 |
| CKM      | 2.413892 | 0.447206 | -2.43235 | 2.78E-05 | 0.000118 |
| RF02133  | 0.047081 | 0.360315 | 2.936044 | 0.000279 | 0.000838 |
| RIBC2    | 0.407185 | 1.291187 | 1.664944 | 0.000102 | 0.000354 |
| USP2     | 3.522492 | 0.979743 | -1.84612 | 1.36E-06 | 9.42E-06 |
| RNF144A- | 0.048139 | 0.222993 | 2.211706 | 1.03E-08 | 1.81E-07 |
| AKR1C2   | 10.3114  | 3.338668 | -1.6269  | 8.62E-08 | 9.90E-07 |
| RNA5SP3C | 0.036735 | 0.245291 | 2.739277 | 0.00407  | 0.008479 |
| TUBG1P   | 0.144203 | 0.435992 | 1.596205 | 2.16E-07 | 2.08E-06 |
| CST4     | 0.019621 | 1.943703 | 6.630233 | 7.24E-12 | 2.00E-09 |
| C17orf53 | 0.81497  | 2.528061 | 1.633212 | 4.66E-10 | 1.70E-08 |
| ANKRD35  | 3.919009 | 0.818323 | -2.25975 | 7.79E-07 | 5.93E-06 |
| ASPG     | 1.036713 | 0.309083 | -1.74595 | 0.007538 | 0.01445  |
| UBE2Q1-1 | 0.105114 | 0.378174 | 1.847099 | 2.79E-07 | 2.55E-06 |
| MUC21    | 190.9218 | 4.081185 | -5.54785 | 0.005696 | 0.011348 |
| AP000346 | 0.115872 | 0.37591  | 1.69785  | 8.50E-08 | 9.80E-07 |
| COL7A1   | 1.204967 | 4.439776 | 1.881493 | 1.25E-08 | 2.10E-07 |
| DNAH2    | 0.046481 | 0.326435 | 2.812068 | 1.22E-06 | 8.60E-06 |
| RNA5SP2C | 0.076386 | 0.465707 | 2.608048 | 1.98E-07 | 1.95E-06 |
| AC009407 | 0.321473 | 0.913446 | 1.506622 | 0.001013 | 0.002547 |
| RNU6-84C | 0.111145 | 0.321123 | 1.530678 | 0.008393 | 0.015865 |
| AC099811 | 0.077918 | 0.225582 | 1.533626 | 7.25E-06 | 3.82E-05 |
| P4HA3    | 0.187521 | 0.980261 | 2.386117 | 5.06E-11 | 4.13E-09 |
| AC004923 | 0.1996   | 0.715984 | 1.842813 | 2.79E-08 | 3.97E-07 |
| NKAPL    | 0.706653 | 0.231432 | -1.61041 | 0.000197 | 0.000622 |
| KIF20B   | 1.782717 | 5.367274 | 1.590112 | 7.66E-11 | 5.26E-09 |
| AC091887 | 0.075879 | 0.220775 | 1.540798 | 1.05E-05 | 5.20E-05 |
| AL049539 | 0.12858  | 0.513637 | 1.998079 | 2.16E-07 | 2.08E-06 |
| AC008957 | 0.075384 | 0.256831 | 1.768499 | 0.000862 | 0.002219 |
| SOSTDC1  | 14.59041 | 2.834807 | -2.3637  | 5.20E-08 | 6.57E-07 |
| RNU6-38C | 0.347359 | 1.391872 | 2.002529 | 1.89E-07 | 1.87E-06 |
| OSM      | 0.580844 | 2.134351 | 1.877574 | 0.000137 | 0.000455 |
| AACSP1   | 0.025141 | 0.299444 | 3.574147 | 0.002687 | 0.005915 |
| AL136115 | 0.197591 | 0.589364 | 1.576639 | 1.24E-06 | 8.69E-06 |
| STON1    | 7.069824 | 2.219725 | -1.67129 | 0.007171 | 0.013839 |
| TOP2A    | 5.567495 | 35.16971 | 2.659233 | 9.90E-12 | 2.14E-09 |
| RNASE3   | 0.041505 | 0.286695 | 2.788156 | 0.009209 | 0.017187 |
| AL161431 | 0.36487  | 3.336752 | 3.192989 | 1.17E-06 | 8.32E-06 |
| AC105036 | 0.072847 | 0.250099 | 1.779561 | 8.76E-06 | 4.47E-05 |
| AKAP6    | 1.924268 | 0.549185 | -1.80895 | 0.002542 | 0.005639 |
| HELB     | 0.510023 | 1.487523 | 1.544279 | 9.57E-11 | 5.99E-09 |
| RNA5SP4C | 0.085219 | 0.318025 | 1.899904 | 0.000485 | 0.001345 |
| MIR3690  | 0.072369 | 0.369854 | 2.353514 | 0.00294  | 0.006393 |
| IGHV3-75 | 1.65634  | 0.189654 | -3.12656 | 0.004629 | 0.009483 |
| TBILA    | 0.272956 | 0.941587 | 1.786428 | 1.40E-06 | 9.64E-06 |
| MYL9     | 961.4313 | 212.3496 | -2.17874 | 1.76E-05 | 8.00E-05 |
| AL591468 | 0.075167 | 0.23418  | 1.639443 | 0.000177 | 0.000565 |
| BUB1B    | 1.597979 | 6.355347 | 1.991722 | 2.94E-10 | 1.22E-08 |
| PLK1     | 4.683686 | 13.83323 | 1.562422 | 1.17E-08 | 1.99E-07 |
| CCKAR    | 2.576081 | 0.586849 | -2.13412 | 6.82E-06 | 3.63E-05 |
| AC007342 | 0.31847  | 1.305648 | 2.035535 | 1.31E-05 | 6.27E-05 |
| AC116025 | 0.122171 | 0.690526 | 2.498794 | 2.36E-08 | 3.48E-07 |

|           |          |          |          |          |          |
|-----------|----------|----------|----------|----------|----------|
| AC083809  | 0.148902 | 2.337504 | 3.972538 | 0.004825 | 0.009833 |
| MIR1203   | 0.075163 | 0.412603 | 2.456663 | 0.000397 | 0.001135 |
| C2orf48   | 0.093871 | 0.582978 | 2.63469  | 1.73E-08 | 2.71E-07 |
| SPDYC     | 0.154184 | 1.497717 | 3.280041 | 1.11E-07 | 1.22E-06 |
| TRIM59    | 0.500838 | 1.49608  | 1.578771 | 1.35E-10 | 7.40E-09 |
| HSPA8P3   | 0.067344 | 0.279881 | 2.055198 | 4.77E-07 | 3.94E-06 |
| AL590006  | 0.183089 | 0.527491 | 1.526601 | 3.05E-05 | 0.000128 |
| AC015660  | 0.126739 | 0.362949 | 1.517902 | 0.000999 | 0.002519 |
| CDKN2A    | 1.469378 | 8.261832 | 2.491256 | 0.00059  | 0.001592 |
| CCDC69    | 30.11264 | 9.469735 | -1.66897 | 6.52E-08 | 7.88E-07 |
| Z99127.2  | 0.099231 | 0.42821  | 2.109458 | 3.18E-07 | 2.84E-06 |
| RNA5SP32  | 0.07633  | 0.430657 | 2.496207 | 6.36E-06 | 3.43E-05 |
| MSH5      | 0.251189 | 1.099135 | 2.129525 | 2.56E-10 | 1.11E-08 |
| PCSK9     | 2.044024 | 6.272936 | 1.617729 | 0.000134 | 0.000448 |
| Z98257.1  | 0.049849 | 0.454267 | 3.187899 | 5.64E-05 | 0.000214 |
| FOXD2     | 0.711843 | 2.173667 | 1.6105   | 1.56E-08 | 2.49E-07 |
| ZNF367    | 1.583941 | 4.714525 | 1.573594 | 1.42E-10 | 7.66E-09 |
| MMP2-AS   | 0.059848 | 0.259839 | 2.118239 | 5.17E-06 | 2.88E-05 |
| LGR5      | 0.794661 | 6.517745 | 3.035961 | 5.12E-05 | 0.000198 |
| CKAP2L    | 0.857177 | 3.232917 | 1.915171 | 2.37E-10 | 1.05E-08 |
| DDX12P    | 0.399257 | 1.388833 | 1.798483 | 1.02E-09 | 3.03E-08 |
| PPP1R1B   | 12.87048 | 53.27717 | 2.049452 | 0.011291 | 0.020458 |
| AC024451  | 0.105944 | 0.398797 | 1.912351 | 8.06E-08 | 9.37E-07 |
| AC009704  | 0.130326 | 0.405986 | 1.639306 | 3.54E-07 | 3.09E-06 |
| AC022022  | 0.061153 | 0.218362 | 1.836224 | 4.02E-05 | 0.000162 |
| NPIP11    | 0.166891 | 0.498443 | 1.57852  | 1.65E-08 | 2.61E-07 |
| NCAPG2    | 1.706408 | 5.058026 | 1.567612 | 3.60E-10 | 1.40E-08 |
| MKI67     | 4.882431 | 20.59101 | 2.076343 | 1.12E-10 | 6.54E-09 |
| SRCIN1    | 0.331097 | 1.493205 | 2.173085 | 0.000101 | 0.000351 |
| AC020661  | 0.102442 | 0.329202 | 1.684164 | 1.28E-05 | 6.16E-05 |
| UTS2      | 0.072096 | 0.549633 | 2.930478 | 0.000286 | 0.000856 |
| AC079336  | 0.130793 | 0.384544 | 1.555861 | 3.74E-05 | 0.000152 |
| CFAP43    | 0.070632 | 0.238713 | 1.756883 | 2.59E-07 | 2.40E-06 |
| MIR1249   | 0.085112 | 0.406294 | 2.255095 | 5.72E-06 | 3.15E-05 |
| AL357134  | 0.080551 | 0.251644 | 1.643416 | 0.002327 | 0.005227 |
| MIR4525   | 0.01502  | 0.512778 | 5.093331 | 1.54E-07 | 1.58E-06 |
| HOXA11    | 0.225183 | 2.067289 | 3.198571 | 6.38E-09 | 1.24E-07 |
| FOXF2     | 28.14413 | 9.22843  | -1.60868 | 0.001194 | 0.002939 |
| AL117187  | 0.18931  | 0.550493 | 1.539973 | 0.000113 | 0.000386 |
| AC067930  | 0.160286 | 0.568741 | 1.827122 | 3.41E-06 | 2.02E-05 |
| CAPN12    | 0.379113 | 1.119681 | 1.562387 | 0.000233 | 0.000719 |
| AC009093  | 0.078152 | 0.280753 | 1.844949 | 1.56E-08 | 2.49E-07 |
| DOC2A     | 0.057625 | 0.270901 | 2.232988 | 0.000121 | 0.00041  |
| RNF223    | 6.640977 | 2.180475 | -1.60675 | 0.011602 | 0.020945 |
| RNU7-19f  | 0.074176 | 0.327902 | 2.144236 | 0.016799 | 0.028887 |
| AL031009  | 0.088247 | 0.32526  | 1.881981 | 1.32E-09 | 3.67E-08 |
| TRMT2B-1  | 0.122419 | 0.409506 | 1.74206  | 1.37E-05 | 6.47E-05 |
| DLGAP5    | 1.956386 | 6.920068 | 1.822595 | 1.09E-09 | 3.16E-08 |
| AL391994  | 0.126802 | 0.41253  | 1.701924 | 1.48E-05 | 6.95E-05 |
| AL353804  | 0.12435  | 0.376009 | 1.596356 | 7.70E-06 | 4.02E-05 |
| LINC02571 | 0.68473  | 3.158531 | 2.205646 | 0.000318 | 0.000939 |
| ARHGAP8   | 0.216595 | 0.922575 | 2.090669 | 6.13E-11 | 4.53E-09 |
| CWH43     | 3.688168 | 0.219911 | -4.06791 | 8.11E-08 | 9.42E-07 |
| AC105460  | 0.708585 | 13.90422 | 4.294437 | 0.002709 | 0.005958 |
| SGO1      | 0.685339 | 3.116179 | 2.184889 | 8.25E-12 | 2.04E-09 |
| AC007991  | 0.490635 | 4.331672 | 3.142203 | 2.39E-05 | 0.000104 |
| PPIAP59   | 0.070224 | 0.214426 | 1.610444 | 3.60E-06 | 2.12E-05 |
| SPAG5     | 1.9925   | 7.149978 | 1.843359 | 5.19E-10 | 1.83E-08 |

|           |          |          |          |          |          |
|-----------|----------|----------|----------|----------|----------|
| PNOC      | 1.999265 | 0.603903 | -1.72708 | 0.000154 | 0.000503 |
| ENPP7P8   | 0.113228 | 0.55409  | 2.290884 | 0.000144 | 0.000476 |
| AC012073  | 0.366883 | 1.450418 | 1.983078 | 1.23E-11 | 2.34E-09 |
| NACAD     | 2.448082 | 0.830199 | -1.56012 | 0.00095  | 0.002411 |
| PCOLCE2   | 3.279561 | 0.555307 | -2.56215 | 1.88E-07 | 1.86E-06 |
| IL36G     | 0.090636 | 0.273346 | 1.592579 | 0.006619 | 0.012919 |
| LINC0224  | 0.124718 | 0.425912 | 1.771889 | 0.000481 | 0.001338 |
| PRPH      | 0.77063  | 0.176836 | -2.12363 | 0.000107 | 0.000369 |
| AC013410  | 0.111692 | 0.324188 | 1.537308 | 0.000703 | 0.001855 |
| AP000695  | 0.145444 | 0.669017 | 2.201582 | 6.32E-10 | 2.13E-08 |
| AP000943  | 0.008941 | 0.21824  | 4.609389 | 6.14E-07 | 4.85E-06 |
| TMEM132   | 0.008341 | 1.095391 | 7.037014 | 0.001858 | 0.004305 |
| TNS4      | 7.789098 | 33.50686 | 2.104929 | 0.00386  | 0.008107 |
| RPL12P25  | 0.105696 | 0.308521 | 1.545443 | 5.39E-05 | 0.000206 |
| PTGES2-A  | 0.042278 | 0.338273 | 3.000212 | 1.26E-07 | 1.35E-06 |
| IQANK1    | 4.454378 | 13.30689 | 1.578878 | 2.28E-07 | 2.16E-06 |
| MIR770    | 0.524818 | 0.178346 | -1.55714 | 0.013958 | 0.024598 |
| BOLA2P3   | 0.054968 | 0.214836 | 1.966579 | 7.65E-05 | 0.000277 |
| CADM3     | 5.800038 | 0.923949 | -2.65018 | 6.22E-10 | 2.10E-08 |
| GFRA2     | 0.951112 | 0.214433 | -2.14909 | 1.66E-07 | 1.68E-06 |
| AC010980  | 0.632415 | 0.174311 | -1.85921 | 0.008035 | 0.015271 |
| HSPE1P7   | 0.119253 | 0.410905 | 1.78478  | 1.06E-06 | 7.71E-06 |
| ABALON    | 0.316826 | 1.097697 | 1.792717 | 3.78E-09 | 8.23E-08 |
| BTG2      | 263.7523 | 54.75558 | -2.26811 | 0.000295 | 0.000877 |
| AC020661  | 0.147648 | 0.426423 | 1.530127 | 9.67E-06 | 4.87E-05 |
| FAM72C    | 0.047651 | 0.326579 | 2.776855 | 6.81E-10 | 2.26E-08 |
| IGFL4     | 0.028781 | 0.305719 | 3.409039 | 4.52E-05 | 0.000178 |
| ASAH2     | 3.326968 | 0.301141 | -3.4657  | 0.013455 | 0.023824 |
| AL121839  | 0.366856 | 1.062922 | 1.53475  | 5.94E-07 | 4.72E-06 |
| IGLJ1     | 3.150749 | 0.808226 | -1.96286 | 0.015851 | 0.027483 |
| RNA5SP47  | 0.099146 | 0.374086 | 1.915742 | 0.013617 | 0.024094 |
| HSPA6     | 1.019355 | 3.486177 | 1.773989 | 0.001954 | 0.004493 |
| SCN7A     | 3.209701 | 0.545744 | -2.55614 | 5.25E-07 | 4.28E-06 |
| HS3ST6    | 3.42985  | 0.978551 | -1.80943 | 3.84E-07 | 3.30E-06 |
| MIR4326   | 0.088538 | 0.574862 | 2.698846 | 2.34E-05 | 0.000102 |
| SNORA15   | 0.132207 | 0.444127 | 1.748172 | 0.00083  | 0.002146 |
| AC098934  | 0.505242 | 1.718705 | 1.766275 | 9.82E-07 | 7.22E-06 |
| AC007014  | 0.072426 | 0.30573  | 2.077668 | 4.44E-08 | 5.82E-07 |
| RABGAP1I  | 0.21214  | 0.688551 | 1.698546 | 0.000173 | 0.000556 |
| MIR326    | 0.102327 | 0.322667 | 1.656859 | 0.00798  | 0.015184 |
| DNAH5     | 0.059854 | 0.308006 | 2.363441 | 1.83E-06 | 1.21E-05 |
| TPM3P6    | 0.262868 | 0.782515 | 1.573779 | 2.09E-06 | 1.34E-05 |
| CCL21     | 126.7683 | 38.40042 | -1.723   | 1.15E-06 | 8.21E-06 |
| NPSR1     | 0.877906 | 2.996746 | 1.771258 | 0.000115 | 0.000392 |
| HIST1H2A  | 0.092329 | 0.592646 | 2.682312 | 0.000737 | 0.001936 |
| AC099518  | 0.111133 | 0.399514 | 1.845956 | 2.67E-06 | 1.65E-05 |
| AC244093  | 0.103599 | 0.300118 | 1.534518 | 1.27E-05 | 6.12E-05 |
| PGA5      | 188.6147 | 16.13078 | -3.54755 | 4.13E-05 | 0.000165 |
| TMEM132   | 0.716031 | 0.18878  | -1.92331 | 3.27E-09 | 7.32E-08 |
| RPS20P33  | 0.297231 | 0.916272 | 1.62419  | 2.24E-08 | 3.34E-07 |
| AC039056  | 0.135769 | 0.389377 | 1.520009 | 3.22E-06 | 1.92E-05 |
| FEZF1-AS1 | 0.183193 | 1.770998 | 3.273124 | 1.54E-09 | 4.13E-08 |
| RNASE1    | 461.0775 | 126.7086 | -1.86349 | 7.15E-05 | 0.000261 |
| HMGB1P6   | 2.38614  | 8.851525 | 1.891248 | 9.98E-09 | 1.78E-07 |
| SNORD88   | 0.179293 | 0.796361 | 2.151106 | 1.72E-06 | 1.14E-05 |
| DEFB4A    | 5.460552 | 1.838637 | -1.57041 | 0.009652 | 0.017885 |
| AC080080  | 0.08058  | 0.280125 | 1.797577 | 4.63E-09 | 9.61E-08 |
| ART3      | 0.86259  | 0.248287 | -1.79667 | 0.011138 | 0.020228 |

|           |          |          |          |          |          |
|-----------|----------|----------|----------|----------|----------|
| GSTA1     | 148.0598 | 25.4761  | -2.53896 | 0.011841 | 0.021302 |
| KIAA1549  | 0.595713 | 2.103859 | 1.820348 | 7.63E-09 | 1.43E-07 |
| AC018607  | 0.142608 | 0.538163 | 1.915986 | 2.76E-07 | 2.53E-06 |
| GCNT7     | 0.081334 | 0.244358 | 1.587066 | 5.27E-08 | 6.64E-07 |
| TAGLN3    | 0.866699 | 0.22623  | -1.93774 | 0.000306 | 0.000907 |
| HMGN2P1   | 0.06347  | 0.275269 | 2.1167   | 5.48E-07 | 4.42E-06 |
| LINC00351 | 0.010068 | 0.402885 | 5.322469 | 1.97E-05 | 8.79E-05 |
| MIR548K   | 0.091978 | 0.360395 | 1.970213 | 0.001677 | 0.003933 |
| MUC16     | 0.027321 | 0.507176 | 4.214386 | 9.04E-05 | 0.000319 |
| FCGR3A    | 4.877209 | 17.61283 | 1.852499 | 1.34E-08 | 2.22E-07 |
| LINC01344 | 0.120867 | 0.4323   | 1.838616 | 1.36E-07 | 1.43E-06 |
| LINC02591 | 0.554846 | 1.784438 | 1.68531  | 9.70E-07 | 7.14E-06 |
| RPS14P4   | 0.122576 | 0.72691  | 2.568095 | 9.57E-09 | 1.72E-07 |
| AC096720  | 0.192392 | 0.571343 | 1.570308 | 9.15E-06 | 4.64E-05 |
| LINC02411 | 0.0211   | 0.527185 | 4.643003 | 0.000137 | 0.000456 |
| PPP1R3C   | 14.60264 | 2.964743 | -2.30025 | 2.01E-06 | 1.30E-05 |
| HDC       | 1.390266 | 0.456051 | -1.60809 | 1.61E-05 | 7.44E-05 |
| AP000695  | 0.220443 | 0.73665  | 1.74057  | 2.37E-07 | 2.23E-06 |
| RN7SL200  | 0.189083 | 0.60337  | 1.674023 | 4.03E-06 | 2.34E-05 |
| INHBB     | 1.612886 | 6.107123 | 1.920849 | 0.007379 | 0.014189 |
| CHIA      | 6.934228 | 2.227163 | -1.63853 | 0.001371 | 0.003314 |
| AC109992  | 0.067318 | 0.251643 | 1.902304 | 1.07E-07 | 1.19E-06 |
| MIR3155A  | 0.101952 | 0.522836 | 2.358463 | 9.24E-05 | 0.000325 |
| LOX       | 2.654112 | 8.319062 | 1.648192 | 4.13E-08 | 5.48E-07 |
| CHRD1     | 13.24683 | 3.673576 | -1.85039 | 1.98E-07 | 1.95E-06 |
| ADHFE1    | 1.917183 | 0.490638 | -1.96626 | 5.58E-09 | 1.12E-07 |
| AC080129  | 0.212762 | 0.884056 | 2.0549   | 0.000324 | 0.000952 |
| AC114488  | 0.112889 | 0.329126 | 1.543734 | 0.000332 | 0.000972 |
| PNPLA3    | 0.124565 | 0.524248 | 2.073355 | 0.005565 | 0.011121 |
| MIR5695   | 0.201986 | 0.621196 | 1.620794 | 0.030025 | 0.047767 |
| AIF1L     | 10.9444  | 2.360682 | -2.21292 | 0.001506 | 0.003592 |
| LINC01551 | 0.132403 | 0.599206 | 2.178121 | 0.000112 | 0.000382 |
| TROAP     | 1.709073 | 6.799173 | 1.992145 | 3.18E-10 | 1.29E-08 |
| AL450992  | 1.43079  | 4.104096 | 1.520252 | 0.013276 | 0.023545 |
| AC011479  | 0.085949 | 0.348022 | 2.017619 | 2.88E-08 | 4.08E-07 |
| FIBCD1    | 0.227263 | 2.515665 | 3.468502 | 0.000622 | 0.001667 |
| Z99127.1  | 0.114482 | 0.381912 | 1.738117 | 2.56E-06 | 1.60E-05 |
| POU5F1B   | 0.045143 | 0.273993 | 2.601562 | 8.64E-06 | 4.42E-05 |
| AC007099  | 0.008304 | 0.40859  | 5.620694 | 3.23E-05 | 0.000134 |
| IGLV7-35  | 1.321461 | 0.122565 | -3.43052 | 0.014887 | 0.026015 |
| MIR559    | 0.544009 | 2.048734 | 1.913032 | 7.50E-07 | 5.76E-06 |
| RN7SKP2E  | 0.10831  | 0.351903 | 1.700004 | 1.97E-05 | 8.79E-05 |
| IGKV2-18  | 1.804282 | 0.223471 | -3.01326 | 0.008381 | 0.015849 |
| C1QTNF2   | 2.313618 | 0.765595 | -1.5955  | 0.000132 | 0.00044  |
| MIR3189   | 0.223571 | 2.966157 | 3.729788 | 1.28E-09 | 3.60E-08 |
| SNORD11   | 0.073203 | 0.36239  | 2.307569 | 0.000438 | 0.001233 |
| SOX4      | 7.884534 | 37.08781 | 2.233848 | 8.56E-13 | 1.31E-09 |
| AC026369  | 0.130065 | 0.776578 | 2.577904 | 8.81E-12 | 2.06E-09 |
| SNX25P1   | 0.180082 | 0.657278 | 1.86785  | 3.61E-08 | 4.92E-07 |
| DCUN1D2   | 0.174181 | 0.523289 | 1.587022 | 1.99E-06 | 1.29E-05 |
| ZNF761    | 1.515271 | 4.82078  | 1.669691 | 1.11E-11 | 2.25E-09 |
| AC026356  | 0.360408 | 1.149949 | 1.673869 | 6.13E-11 | 4.53E-09 |
| AL445250  | 0.066641 | 0.2782   | 2.061652 | 0.00818  | 0.015524 |
| AL353693  | 0.026652 | 0.314343 | 3.559998 | 2.04E-05 | 9.08E-05 |
| AL136115  | 0.138858 | 0.576743 | 2.054313 | 2.15E-08 | 3.23E-07 |
| AC006330  | 0.134806 | 0.455944 | 1.757974 | 3.03E-08 | 4.27E-07 |
| MYO1B     | 3.037639 | 8.738932 | 1.524507 | 4.17E-11 | 3.74E-09 |
| FLJ22447  | 0.081158 | 0.351799 | 2.115953 | 0.000108 | 0.000371 |



|           |          |          |          |          |          |
|-----------|----------|----------|----------|----------|----------|
| ACTG2     | 876.7199 | 254.6278 | -1.78373 | 2.40E-05 | 0.000104 |
| AL034555  | 0.073058 | 0.278898 | 1.932619 | 8.85E-05 | 0.000313 |
| HOXA9     | 0.097298 | 1.632638 | 4.068648 | 5.82E-08 | 7.20E-07 |
| KCNQ1OT   | 0.133301 | 0.530466 | 1.992568 | 8.48E-07 | 6.37E-06 |
| ORC6      | 0.628686 | 2.385653 | 1.923973 | 3.28E-10 | 1.31E-08 |
| RPL31P58  | 0.128191 | 0.419819 | 1.711469 | 8.38E-06 | 4.32E-05 |
| CHST1     | 0.708756 | 2.152023 | 1.602333 | 4.56E-09 | 9.49E-08 |
| AL137244  | 0.077009 | 0.288224 | 1.90408  | 6.47E-07 | 5.08E-06 |
| BCAR4     | 0.017642 | 0.570189 | 5.014335 | 0.0022   | 0.004985 |
| MIR3131   | 1.585671 | 5.581353 | 1.815522 | 0.005495 | 0.011007 |
| AL513327  | 0.072299 | 0.243731 | 1.75325  | 9.63E-06 | 4.85E-05 |
| MIR320B2  | 0.160091 | 0.62442  | 1.96362  | 3.47E-06 | 2.05E-05 |
| RNU6-119  | 0.108095 | 0.311955 | 1.529041 | 0.010152 | 0.018689 |
| AC011298  | 0.070532 | 0.347129 | 2.299121 | 0.019354 | 0.03263  |
| BMP3      | 3.70352  | 1.013422 | -1.86966 | 0.007751 | 0.014806 |
| AC104958  | 0.712293 | 2.782324 | 1.965749 | 0.012248 | 0.02192  |
| AC011676  | 0.080252 | 0.402913 | 2.327866 | 3.81E-09 | 8.28E-08 |
| FAM183A   | 0.164079 | 0.477472 | 1.541025 | 0.021893 | 0.036363 |
| AP002449  | 0.189364 | 0.619846 | 1.710746 | 1.61E-07 | 1.65E-06 |
| AC073335  | 1.263181 | 3.986079 | 1.65791  | 1.48E-08 | 2.39E-07 |
| AQP10     | 6.727235 | 0.283113 | -4.57057 | 0.000213 | 0.000664 |
| TRIM50    | 3.352649 | 0.394307 | -3.08791 | 0.000272 | 0.000821 |
| NKD2      | 0.627885 | 3.979653 | 2.664071 | 0.000223 | 0.00069  |
| SUCNR1    | 0.718946 | 2.337185 | 1.700817 | 1.22E-06 | 8.60E-06 |
| AC012467  | 0.080694 | 0.622782 | 2.948191 | 1.45E-07 | 1.50E-06 |
| AC005324  | 0.07311  | 0.266452 | 1.865742 | 2.21E-07 | 2.11E-06 |
| AC093001  | 0.161012 | 2.591255 | 4.00841  | 0.004729 | 0.009662 |
| AC141557  | 0.098144 | 0.602794 | 2.618696 | 1.82E-08 | 2.81E-07 |
| AC108676  | 0.049586 | 0.214594 | 2.113602 | 0.001087 | 0.00271  |
| SLC6A4    | 1.441096 | 0.18069  | -2.99558 | 0.000317 | 0.000935 |
| CLDN6     | 0.05396  | 9.68277  | 7.487383 | 0.000251 | 0.000767 |
| VSIG2     | 155.2795 | 35.36748 | -2.13437 | 0.014766 | 0.025828 |
| AC011290  | 0.271697 | 0.782243 | 1.525618 | 1.04E-06 | 7.60E-06 |
| AP003467  | 0.075406 | 0.248933 | 1.72301  | 3.59E-05 | 0.000147 |
| AC027237  | 0.089506 | 0.275258 | 1.620735 | 4.96E-10 | 1.79E-08 |
| AL031709  | 0.092573 | 0.264034 | 1.512066 | 2.26E-05 | 9.91E-05 |
| AC129492  | 0.109386 | 0.408573 | 1.901166 | 0.000374 | 0.001075 |
| AVIL      | 0.497498 | 1.613761 | 1.697665 | 0.000611 | 0.001642 |
| MIR4802   | 0.227412 | 0.692196 | 1.60587  | 0.001426 | 0.00343  |
| DAAM2     | 9.98563  | 3.509296 | -1.50867 | 0.000205 | 0.000642 |
| GRB7      | 5.844573 | 32.3588  | 2.468989 | 3.99E-07 | 3.40E-06 |
| LAMC2     | 5.687372 | 35.41603 | 2.638568 | 2.26E-10 | 1.03E-08 |
| LINC01594 | 0.0512   | 0.497055 | 3.279179 | 3.66E-05 | 0.00015  |
| NPFFR1    | 0.056695 | 0.281089 | 2.309725 | 7.69E-07 | 5.88E-06 |
| TFRC      | 9.810024 | 30.19539 | 1.622    | 2.50E-08 | 3.63E-07 |
| AP002992  | 0.041815 | 0.285253 | 2.770132 | 0.020401 | 0.034203 |
| TMPRSS5   | 0.132934 | 0.852051 | 2.680226 | 0.000111 | 0.000379 |
| AUNIP     | 0.531548 | 1.914363 | 1.848591 | 1.56E-10 | 8.04E-09 |
| ASGR1     | 0.252844 | 0.858547 | 1.763648 | 0.012925 | 0.022996 |
| PM20D1    | 0.658038 | 0.223937 | -1.55508 | 0.011291 | 0.020458 |
| CKAP2     | 3.544858 | 12.1172  | 1.773256 | 1.16E-10 | 6.61E-09 |
| ADAMTS1   | 0.022209 | 0.317189 | 3.836131 | 5.99E-10 | 2.04E-08 |
| CGAS      | 1.633319 | 4.670196 | 1.515676 | 5.60E-10 | 1.94E-08 |
| BIRC7     | 0.049717 | 1.066605 | 4.423129 | 6.27E-10 | 2.11E-08 |
| AC092171  | 0.177404 | 0.606973 | 1.774593 | 3.61E-08 | 4.92E-07 |
| TWINK     | 1.742737 | 4.935    | 1.501695 | 2.11E-11 | 2.71E-09 |
| SFRP4     | 5.442466 | 28.3795  | 2.382517 | 3.33E-06 | 1.98E-05 |
| AL138689  | 0.148101 | 0.469262 | 1.663809 | 0.000121 | 0.00041  |

|           |          |          |          |          |          |
|-----------|----------|----------|----------|----------|----------|
| RN7SL535  | 0.109317 | 0.391079 | 1.838936 | 1.29E-06 | 8.99E-06 |
| AC008109  | 0.003282 | 0.460544 | 7.132839 | 0.000111 | 0.000381 |
| NOX4      | 0.210662 | 0.623433 | 1.565304 | 4.73E-08 | 6.11E-07 |
| AL928654  | 0.39677  | 1.244601 | 1.649309 | 1.19E-09 | 3.38E-08 |
| LHFPL3    | 0.15326  | 0.857703 | 2.484501 | 0.007555 | 0.014482 |
| KNL1      | 0.937057 | 3.183377 | 1.764349 | 3.23E-09 | 7.25E-08 |
| ANKRD61   | 0.165242 | 0.584785 | 1.823326 | 1.56E-10 | 8.04E-09 |
| NEURL3    | 0.408132 | 1.857686 | 2.186398 | 2.95E-05 | 0.000124 |
| RNA5SP11  | 0.654997 | 1.969753 | 1.588455 | 0.019636 | 0.033082 |
| RNU6-75C  | 0.403303 | 1.141952 | 1.501566 | 5.16E-05 | 0.000199 |
| COL5A1    | 12.83991 | 38.63024 | 1.589095 | 9.02E-07 | 6.71E-06 |
| CDH19     | 2.119863 | 0.365243 | -2.53704 | 6.32E-07 | 4.97E-06 |
| KLF8      | 1.626891 | 0.493595 | -1.72072 | 0.000926 | 0.00236  |
| PPM1H     | 1.37828  | 6.132763 | 2.153668 | 3.98E-11 | 3.62E-09 |
| SCARNA8   | 0.111557 | 0.329895 | 1.564221 | 0.000435 | 0.001227 |
| AC011462  | 0.239634 | 0.721315 | 1.589794 | 2.24E-07 | 2.14E-06 |
| CDC48     | 4.725649 | 13.53421 | 1.518026 | 7.74E-09 | 1.45E-07 |
| TAC1      | 2.42615  | 0.673154 | -1.84966 | 0.00221  | 0.005001 |
| RF02140   | 0.034345 | 0.420611 | 3.614324 | 1.70E-06 | 1.13E-05 |
| GTSE1     | 1.403877 | 5.236865 | 1.899286 | 5.03E-10 | 1.80E-08 |
| HSPD1P6   | 0.058708 | 0.212594 | 1.856462 | 9.12E-11 | 5.85E-09 |
| CYCSP34   | 0.212656 | 0.937311 | 2.140004 | 1.62E-08 | 2.56E-07 |
| GDF7      | 0.544006 | 0.179531 | -1.59939 | 1.96E-05 | 8.75E-05 |
| AC011287  | 0.026954 | 0.476759 | 4.144703 | 0.000368 | 0.00106  |
| KLK6      | 3.717638 | 31.46242 | 3.081171 | 2.67E-05 | 0.000114 |
| LUCAT1    | 0.080467 | 0.360884 | 2.165071 | 7.35E-06 | 3.86E-05 |
| AP005131  | 0.096982 | 0.277269 | 1.5155   | 0.001026 | 0.002575 |
| AL606970  | 0.056771 | 0.23438  | 2.045614 | 0.010357 | 0.019024 |
| LRP8      | 0.4595   | 2.255559 | 2.295349 | 6.23E-11 | 4.54E-09 |
| AC122108  | 0.047575 | 0.265757 | 2.481844 | 0.000446 | 0.001252 |
| AC008121  | 0.072615 | 0.224558 | 1.628744 | 0.000565 | 0.001536 |
| LMOD1     | 110.7755 | 26.66531 | -2.0546  | 2.90E-06 | 1.77E-05 |
| MELTF     | 0.75786  | 5.487575 | 2.856165 | 2.48E-10 | 1.09E-08 |
| DUXAP10   | 0.018732 | 0.267166 | 3.83413  | 1.06E-10 | 6.36E-09 |
| F5        | 1.358786 | 8.164867 | 2.587111 | 5.28E-05 | 0.000203 |
| LINC01651 | 0.090039 | 0.454788 | 2.336565 | 1.83E-05 | 8.26E-05 |
| RNU6-78C  | 0.306157 | 0.898304 | 1.552932 | 3.91E-05 | 0.000158 |
| AP001429  | 0.108594 | 0.363894 | 1.744571 | 3.51E-08 | 4.81E-07 |
| MIR4641   | 0.136636 | 0.6885   | 2.333122 | 7.99E-05 | 0.000287 |
| TRAJ5     | 0.094706 | 0.383594 | 2.018055 | 0.003422 | 0.007301 |
| AC078883  | 0.075171 | 0.329755 | 2.133148 | 1.17E-05 | 5.71E-05 |
| GPBR1     | 4.705367 | 1.314855 | -1.8394  | 1.03E-05 | 5.13E-05 |
| INAFM2    | 46.01016 | 12.78135 | -1.84791 | 0.021338 | 0.035558 |
| LCN1      | 0.003408 | 0.569381 | 7.384423 | 4.37E-07 | 3.67E-06 |
| PLA2G7    | 2.511976 | 7.975337 | 1.666723 | 9.70E-08 | 1.09E-06 |
| MSLN      | 8.353992 | 50.11396 | 2.584675 | 7.56E-06 | 3.96E-05 |
| CCL18     | 10.06574 | 29.0937  | 1.531253 | 0.002134 | 0.004851 |
| MTATP6P1  | 0.060914 | 0.263511 | 2.113026 | 8.67E-07 | 6.49E-06 |
| MAL2-AS1  | 0.096458 | 0.400296 | 2.053102 | 3.71E-08 | 5.02E-07 |
| MIR3176   | 0.949863 | 3.711577 | 1.966241 | 5.23E-08 | 6.61E-07 |
| BRCC3P1   | 0.103627 | 0.314258 | 1.600556 | 1.18E-08 | 2.01E-07 |
| MUC5B     | 1.860292 | 15.20848 | 3.031276 | 0.015874 | 0.027505 |
| MESP2     | 0.138195 | 0.575758 | 2.05876  | 2.62E-05 | 0.000112 |
| AC132938  | 0.142346 | 0.415969 | 1.54707  | 5.41E-08 | 6.79E-07 |
| NOP56P3   | 0.089704 | 0.390483 | 2.12201  | 6.59E-08 | 7.95E-07 |
| MIR3192   | 0.149879 | 0.543894 | 1.859531 | 2.97E-05 | 0.000125 |
| GAL3ST2   | 0.094929 | 2.389512 | 4.653725 | 1.46E-08 | 2.36E-07 |
| PRR19     | 0.218303 | 0.925423 | 2.083779 | 1.06E-08 | 1.84E-07 |

|          |          |          |          |          |          |
|----------|----------|----------|----------|----------|----------|
| NRG2     | 0.877363 | 0.272125 | -1.6889  | 5.51E-06 | 3.05E-05 |
| AC124798 | 0.58697  | 2.422081 | 2.044889 | 6.61E-08 | 7.96E-07 |
| AL117329 | 0.00674  | 0.305943 | 5.504355 | 2.85E-06 | 1.74E-05 |
| IGKV7-3  | 3.415459 | 0.650095 | -2.39336 | 0.017006 | 0.02918  |
| WISP2    | 2.845376 | 0.413387 | -2.78305 | 2.45E-12 | 1.40E-09 |
| DNAAF3   | 0.160598 | 0.552846 | 1.78342  | 4.69E-07 | 3.89E-06 |
| AC103563 | 1.794437 | 0.148398 | -3.59598 | 4.32E-12 | 1.58E-09 |
| AADACL2  | 0.075044 | 0.220042 | 1.551976 | 0.003973 | 0.008311 |
| PCP4L1   | 8.471043 | 1.486724 | -2.5104  | 5.62E-05 | 0.000213 |
| AL121782 | 0.050329 | 0.241918 | 2.265064 | 1.12E-06 | 8.05E-06 |
| TESMIN   | 0.339138 | 1.608603 | 2.245862 | 2.03E-10 | 9.51E-09 |
| AC020907 | 0.255861 | 0.784847 | 1.617049 | 0.005857 | 0.011617 |
| FRRS1L   | 1.644469 | 0.458571 | -1.84241 | 7.60E-05 | 0.000275 |
| AL356234 | 0.066366 | 0.381255 | 2.522234 | 1.81E-05 | 8.17E-05 |
| GUCY1B2  | 0.034263 | 0.314142 | 3.196697 | 3.42E-09 | 7.54E-08 |
| NIPAL4   | 2.239323 | 0.525103 | -2.09239 | 0.002367 | 0.005301 |
| SAA2     | 1.107449 | 4.378332 | 1.983141 | 0.011721 | 0.021132 |
| RNU6-379 | 0.181466 | 0.527129 | 1.538459 | 0.000352 | 0.001021 |
| AC087465 | 0.061651 | 0.214263 | 1.797181 | 0.000585 | 0.001584 |
| BNIP3P11 | 0.18675  | 0.975307 | 2.384748 | 7.31E-11 | 5.12E-09 |
| NKX2-5   | 0.091511 | 0.769094 | 3.07114  | 0.019072 | 0.03223  |
| MELK     | 2.414598 | 9.376897 | 1.957327 | 2.26E-10 | 1.03E-08 |
| AC008379 | 0.11246  | 0.353657 | 1.652939 | 3.84E-06 | 2.25E-05 |
| AP001207 | 0.070509 | 0.216757 | 1.620189 | 0.000379 | 0.00109  |
| ITIH2    | 0.07061  | 1.602725 | 4.504519 | 0.000121 | 0.000408 |
| APOE     | 45.807   | 144.7933 | 1.660355 | 2.80E-06 | 1.72E-05 |
| TMEM238  | 24.48782 | 6.367398 | -1.94329 | 0.00931  | 0.017345 |
| MYOM1    | 4.052298 | 1.258008 | -1.6876  | 0.002117 | 0.004816 |
| SNORA51  | 0.084945 | 0.283377 | 1.738119 | 0.000432 | 0.001219 |
| MIR548XF | 0.011854 | 0.252522 | 4.41298  | 0.011788 | 0.021231 |
| AC010435 | 0.106736 | 0.308628 | 1.53182  | 5.04E-06 | 2.82E-05 |
| AC079305 | 0.56112  | 0.182291 | -1.62207 | 0.000155 | 0.000506 |
| NETO2    | 0.420318 | 1.728296 | 2.039798 | 8.38E-07 | 6.31E-06 |
| AC012531 | 0.013215 | 0.308519 | 4.545102 | 3.91E-11 | 3.62E-09 |
| AC011472 | 2.09658  | 0.661942 | -1.66326 | 0.001457 | 0.003492 |
| CTCFL    | 0.009976 | 0.35139  | 5.138412 | 0.01793  | 0.030561 |
| ENHO     | 1.669295 | 0.560824 | -1.57362 | 9.08E-05 | 0.00032  |
| AGT      | 5.159137 | 26.56899 | 2.364542 | 3.45E-06 | 2.04E-05 |
| AC022784 | 0.265085 | 3.012443 | 3.506409 | 8.08E-06 | 4.18E-05 |
| SOX9     | 18.91488 | 70.06903 | 1.889255 | 4.90E-11 | 4.06E-09 |
| Z99127.3 | 0.103679 | 0.364038 | 1.81197  | 0.000119 | 0.000403 |
| AC006270 | 0.07561  | 0.24229  | 1.680077 | 0.001093 | 0.002724 |
| AC010980 | 0.978911 | 0.236371 | -2.05012 | 0.028015 | 0.045015 |
| CMA1     | 1.758077 | 0.398143 | -2.14264 | 1.40E-08 | 2.29E-07 |
| AC127024 | 0.149008 | 0.471226 | 1.661027 | 1.79E-05 | 8.10E-05 |
| LINC0258 | 0.009253 | 1.26375  | 7.093539 | 0.000266 | 0.000805 |
| HOTAIR   | 0.052907 | 1.303835 | 4.623161 | 1.15E-10 | 6.61E-09 |
| MIR4755  | 0.281239 | 0.840338 | 1.579175 | 0.000442 | 0.001244 |
| RF02250  | 0.030552 | 0.304225 | 3.315783 | 5.78E-05 | 0.000219 |
| SNORD10  | 0.967446 | 3.334291 | 1.785126 | 4.14E-07 | 3.51E-06 |
| KLHL35   | 0.251227 | 1.010952 | 2.008652 | 5.25E-07 | 4.28E-06 |
| BLACAT1  | 0.180327 | 1.677623 | 3.217728 | 3.88E-10 | 1.48E-08 |
| AC138150 | 0.111355 | 0.420813 | 1.918016 | 3.57E-05 | 0.000146 |
| POLE2    | 1.052789 | 2.991283 | 1.506549 | 5.35E-10 | 1.87E-08 |
| FADS6    | 1.38027  | 0.372554 | -1.88943 | 0.002017 | 0.00462  |
| HOTTIP   | 0.128856 | 1.267283 | 3.297911 | 3.58E-08 | 4.89E-07 |
| FAM96AP  | 0.145848 | 0.563381 | 1.949643 | 0.000168 | 0.000539 |
| AC004383 | 0.103962 | 0.320533 | 1.624414 | 2.58E-05 | 0.000111 |

|          |          |          |          |          |          |
|----------|----------|----------|----------|----------|----------|
| BNIP3P17 | 0.165606 | 0.790403 | 2.254836 | 6.27E-05 | 0.000234 |
| PDILT    | 1.43091  | 0.197224 | -2.85903 | 0.000304 | 0.000903 |
| DWORF    | 0.056175 | 0.250611 | 2.157461 | 0.011382 | 0.02061  |
| NAP1L2   | 1.688896 | 0.469973 | -1.84543 | 2.23E-07 | 2.13E-06 |
| CT83     | 0.303787 | 7.593888 | 4.643705 | 0.000164 | 0.000529 |
| PI15     | 0.474555 | 1.805573 | 1.927811 | 0.027859 | 0.044774 |
| FOXL1    | 0.536759 | 1.72039  | 1.680389 | 3.79E-07 | 3.27E-06 |
| PLA1A    | 1.367908 | 4.106777 | 1.586036 | 7.15E-05 | 0.000261 |
| ZNF29P   | 0.112605 | 0.360977 | 1.680633 | 0.000125 | 0.000421 |
| STX8P1   | 0.035937 | 0.22587  | 2.651931 | 2.50E-05 | 0.000108 |
| TRAJ37   | 0.082524 | 0.427492 | 2.373016 | 0.001591 | 0.003764 |
| TM4SF1-A | 0.171114 | 0.566577 | 1.727319 | 0.000555 | 0.001511 |
| AC004898 | 0.094085 | 0.308348 | 1.71252  | 4.92E-08 | 6.29E-07 |
| AC021945 | 0.0459   | 0.218523 | 2.25122  | 2.79E-08 | 3.97E-07 |
| ZNF252P- | 0.067381 | 0.223285 | 1.728476 | 1.25E-08 | 2.10E-07 |
| EDN3     | 8.277222 | 2.255778 | -1.87552 | 0.00085  | 0.002191 |
| MIR5587  | 0.797668 | 3.37581  | 2.081373 | 8.53E-07 | 6.40E-06 |
| BCAT1    | 0.852832 | 3.186749 | 1.901752 | 4.97E-05 | 0.000193 |
| CBR1     | 50.66447 | 15.45918 | -1.71251 | 1.65E-06 | 1.10E-05 |
| TACR2    | 24.61692 | 7.207966 | -1.77199 | 0.00404  | 0.008427 |
| RNU6-74f | 0.053352 | 0.306157 | 2.520661 | 0.000234 | 0.000721 |
| CDT1     | 3.790668 | 11.12253 | 1.552961 | 6.70E-08 | 8.05E-07 |
| MIR6740  | 0.019774 | 0.473124 | 4.580557 | 1.41E-08 | 2.30E-07 |
| RAET1K   | 0.03839  | 0.221341 | 2.527479 | 1.74E-08 | 2.73E-07 |
| LINC0225 | 0.069602 | 0.25125  | 1.851933 | 1.44E-06 | 9.83E-06 |
| AC105219 | 0.17351  | 0.507063 | 1.547146 | 5.80E-07 | 4.62E-06 |
| ACBD7    | 0.183681 | 1.120213 | 2.608502 | 2.00E-08 | 3.05E-07 |
| GDF15    | 7.563278 | 41.78331 | 2.465843 | 1.24E-09 | 3.50E-08 |
| GPR84    | 0.264981 | 0.83929  | 1.663278 | 8.38E-07 | 6.31E-06 |
| LRRC4    | 1.913333 | 0.671488 | -1.51065 | 0.0001   | 0.000348 |
| RNU6-34f | 0.198887 | 0.581136 | 1.546923 | 0.000701 | 0.001852 |
| RNU6-11f | 0.047813 | 0.224783 | 2.233064 | 0.000943 | 0.002396 |
| ATP5PFP1 | 0.788842 | 0.249989 | -1.65787 | 0.023143 | 0.038157 |
| RNU6-87f | 0.171026 | 0.586016 | 1.776722 | 0.000329 | 0.000964 |
| SLC5A5   | 26.2553  | 3.205189 | -3.03413 | 0.002749 | 0.006036 |
| AKR1B15  | 2.829153 | 0.308149 | -3.19867 | 9.23E-05 | 0.000325 |
| AC245884 | 0.690803 | 2.041273 | 1.563123 | 1.75E-06 | 1.16E-05 |
| COL4A5   | 8.036996 | 2.451404 | -1.71305 | 0.000477 | 0.001326 |
| PIP      | 0.021692 | 0.388138 | 4.161351 | 0.006425 | 0.012594 |
| GLIS3    | 0.61235  | 1.741674 | 1.508047 | 7.01E-05 | 0.000257 |
| HSPE1P6  | 0.223676 | 0.77963  | 1.801378 | 4.57E-07 | 3.81E-06 |
| COL21A1  | 1.399754 | 0.372406 | -1.91022 | 0.010048 | 0.018521 |
| AL157838 | 0.188313 | 0.709803 | 1.914283 | 9.21E-10 | 2.83E-08 |
| AC048344 | 0.186872 | 0.569918 | 1.608706 | 5.65E-07 | 4.53E-06 |
| TREML3P  | 0.070691 | 0.226844 | 1.682105 | 0.003302 | 0.00707  |
| AC025280 | 1.280363 | 0.398417 | -1.6842  | 0.004367 | 0.009013 |
| LGALS9B  | 5.566091 | 1.128465 | -2.3023  | 0.000357 | 0.001033 |
| ZNF724   | 0.341497 | 1.079481 | 1.660393 | 1.07E-06 | 7.75E-06 |
| RYR3     | 0.728513 | 0.218351 | -1.7383  | 0.001518 | 0.003616 |
| CNN1     | 434.9242 | 111.879  | -1.95883 | 7.73E-06 | 4.03E-05 |
| SNORD11  | 0.101732 | 0.457623 | 2.169386 | 3.07E-05 | 0.000128 |
| MIR548L  | 0.161921 | 0.529347 | 1.708922 | 0.000312 | 0.000922 |
| MIR4677  | 0.13454  | 0.47253  | 1.812368 | 0.000302 | 0.000896 |
| CYP4B1   | 3.243323 | 0.540634 | -2.58475 | 5.06E-07 | 4.14E-06 |
| SPEG     | 5.708746 | 1.703384 | -1.74477 | 0.002443 | 0.005447 |
| MMP3     | 0.630901 | 19.14074 | 4.923089 | 1.53E-06 | 1.04E-05 |
| PPP1R26- | 0.190181 | 0.609622 | 1.680542 | 2.33E-10 | 1.04E-08 |
| TMEM220  | 1.362647 | 0.451395 | -1.59395 | 6.97E-08 | 8.31E-07 |

|           |          |          |          |          |          |
|-----------|----------|----------|----------|----------|----------|
| HBA2      | 47.62543 | 15.37647 | -1.63101 | 6.35E-08 | 7.74E-07 |
| SGK494    | 0.306664 | 0.886035 | 1.530703 | 4.01E-09 | 8.63E-08 |
| AC004080  | 0.167169 | 1.221801 | 2.869634 | 3.01E-07 | 2.71E-06 |
| NPY       | 2.723065 | 0.921326 | -1.56345 | 3.07E-05 | 0.000128 |
| EPHA7     | 7.114151 | 1.301708 | -2.45029 | 0.008035 | 0.015271 |
| CARMN     | 3.546036 | 1.151216 | -1.62305 | 0.016295 | 0.028133 |
| LINC0234I | 0.096546 | 0.429267 | 2.152584 | 0.000432 | 0.001219 |
| AL359922  | 0.092782 | 0.269618 | 1.538993 | 6.97E-07 | 5.41E-06 |
| FAM107A   | 6.354434 | 1.598574 | -1.99098 | 2.83E-09 | 6.55E-08 |
| AP001372  | 0.04815  | 0.240033 | 2.31761  | 6.84E-08 | 8.19E-07 |
| CYP2AB1F  | 0.639279 | 0.181616 | -1.81555 | 0.001577 | 0.003737 |
| DNMT3B    | 0.403726 | 2.638932 | 2.708506 | 5.31E-11 | 4.26E-09 |
| KCNH8     | 0.156912 | 0.667148 | 2.088048 | 0.000858 | 0.002207 |
| STRA6     | 0.100348 | 2.727799 | 4.764652 | 5.08E-12 | 1.80E-09 |
| AC004593  | 0.075907 | 0.307034 | 2.016089 | 2.12E-05 | 9.37E-05 |
| SMKR1     | 0.369754 | 1.317299 | 1.832945 | 8.26E-06 | 4.27E-05 |
| AC079949  | 0.175521 | 0.90642  | 2.36854  | 0.007019 | 0.013583 |
| LINC0198I | 0.009857 | 0.909739 | 6.528158 | 1.91E-05 | 8.60E-05 |
| CCDC198   | 0.030196 | 0.844507 | 4.805695 | 2.11E-05 | 9.34E-05 |
| HSD3BP5   | 0.101975 | 0.539178 | 2.402546 | 0.010614 | 0.019397 |
| CSAG2     | 0.006284 | 0.623203 | 6.631949 | 4.22E-06 | 2.43E-05 |
| RNU7-12C  | 0.165265 | 0.568603 | 1.782637 | 0.000331 | 0.00097  |
| AC007285  | 0.079914 | 0.263057 | 1.718847 | 6.26E-07 | 4.93E-06 |
| RBM12B-1  | 0.436474 | 1.261565 | 1.531248 | 2.34E-09 | 5.67E-08 |
| UBE2C     | 13.47531 | 61.37355 | 2.187299 | 7.69E-10 | 2.48E-08 |
| FOXCUT    | 0.035843 | 0.220398 | 2.620329 | 0.000154 | 0.000503 |
| AP000424  | 0.04089  | 0.219508 | 2.424458 | 0.000315 | 0.000929 |
| MAT1A     | 0.063195 | 0.755364 | 3.579278 | 0.008651 | 0.016281 |
| LCN12     | 0.184019 | 1.040303 | 2.499079 | 4.63E-05 | 0.000182 |
| AC002398  | 1.68002  | 0.401984 | -2.06327 | 0.000157 | 0.00051  |
| LRRC10B   | 3.07889  | 0.96884  | -1.66808 | 0.027859 | 0.044774 |
| AC099518  | 0.095869 | 0.319078 | 1.734774 | 2.35E-08 | 3.47E-07 |
| MXRA5     | 9.242679 | 30.37779 | 1.716634 | 1.25E-08 | 2.10E-07 |
| TRAJ2     | 0.193557 | 0.762493 | 1.977968 | 0.000927 | 0.002362 |
| CLPSL1    | 0.050274 | 0.421986 | 3.069313 | 0.004075 | 0.008488 |
| HOXC12    | 0.011557 | 2.189306 | 7.56555  | 1.20E-05 | 5.84E-05 |
| KIF2C     | 2.755568 | 9.292789 | 1.753762 | 8.04E-10 | 2.55E-08 |
| MMP11     | 2.204532 | 21.35944 | 3.276329 | 6.86E-12 | 1.99E-09 |
| RNU7-70F  | 0.093349 | 0.322545 | 1.788799 | 0.023886 | 0.039217 |
| PLPP4     | 0.381118 | 1.130896 | 1.569159 | 0.01341  | 0.023762 |
| C12orf75  | 13.16611 | 38.55914 | 1.550243 | 2.53E-07 | 2.35E-06 |
| AC090181  | 0.493205 | 1.571392 | 1.671783 | 2.17E-07 | 2.08E-06 |
| AC099850  | 2.51814  | 9.278015 | 1.881458 | 7.31E-11 | 5.12E-09 |
| RNU6-79F  | 0.053273 | 0.250769 | 2.23489  | 0.001138 | 0.002821 |
| AL355796  | 0.02604  | 0.256424 | 3.299704 | 4.06E-05 | 0.000163 |
| RNU6-50I  | 0.152447 | 0.449312 | 1.559409 | 0.012246 | 0.02192  |
| PRUNE2    | 20.60168 | 7.072717 | -1.54243 | 0.001703 | 0.003984 |
| MIR3117   | 0.114827 | 0.337317 | 1.554639 | 0.013167 | 0.023381 |
| FOXH1     | 0.0483   | 0.705885 | 3.869336 | 1.21E-08 | 2.06E-07 |
| AL583810  | 0.144735 | 0.483132 | 1.739    | 6.64E-07 | 5.18E-06 |
| ACAN      | 0.115143 | 1.274846 | 3.468819 | 1.04E-12 | 1.31E-09 |
| MNX1      | 0.775897 | 2.361488 | 1.605759 | 1.21E-07 | 1.31E-06 |
| MIR4659A  | 0.049783 | 0.233132 | 2.227415 | 0.001955 | 0.004495 |
| STRA8     | 0.010955 | 0.235457 | 4.425805 | 0.031135 | 0.049297 |
| ARHGAP1   | 1.605964 | 6.419277 | 1.998971 | 5.75E-11 | 4.42E-09 |
| AC027288  | 0.177671 | 0.710155 | 1.998924 | 0.00038  | 0.001093 |
| FOXP2     | 2.15724  | 0.731829 | -1.55961 | 0.000481 | 0.001337 |
| AC007497  | 0.035796 | 0.212734 | 2.571183 | 1.22E-07 | 1.31E-06 |

|           |          |          |          |          |          |
|-----------|----------|----------|----------|----------|----------|
| RPL26P29  | 0.047992 | 0.247979 | 2.369355 | 8.87E-08 | 1.01E-06 |
| SPINK7    | 43.74006 | 1.614241 | -4.76003 | 0.00011  | 0.000377 |
| AC027018  | 0.101741 | 0.305204 | 1.584867 | 3.20E-05 | 0.000133 |
| CGB5      | 0.004942 | 1.193554 | 7.916087 | 9.92E-06 | 4.97E-05 |
| TNFSF18   | 0.165601 | 0.519518 | 1.649464 | 0.002204 | 0.004987 |
| NEK2      | 1.69626  | 7.699273 | 2.182365 | 9.87E-11 | 6.05E-09 |
| STPG3     | 0.053931 | 0.218903 | 2.021097 | 4.10E-06 | 2.37E-05 |
| AC008763  | 0.14926  | 0.44506  | 1.576174 | 0.000106 | 0.000366 |
| PNMA5     | 0.016518 | 1.966951 | 6.89575  | 0.029928 | 0.047639 |
| MIR7848   | 0.238865 | 0.733881 | 1.619354 | 0.012377 | 0.022127 |
| AC012363  | 0.054187 | 0.750319 | 3.791491 | 1.00E-09 | 2.99E-08 |
| TMEM211   | 1.104287 | 0.307139 | -1.84615 | 0.00364  | 0.007707 |
| IGF2BP2   | 3.736099 | 15.02838 | 2.008085 | 2.96E-09 | 6.79E-08 |
| MAPK15    | 0.235365 | 2.020454 | 3.101705 | 1.31E-10 | 7.24E-09 |
| AL138789  | 0.033796 | 0.465757 | 3.784652 | 1.53E-08 | 2.44E-07 |
| RNU4-53f  | 0.102475 | 0.343459 | 1.744862 | 0.002801 | 0.006136 |
| AC078778  | 0.103966 | 0.300987 | 1.533596 | 2.33E-06 | 1.47E-05 |
| MIR4296   | 0.062692 | 0.299947 | 2.258345 | 0.001233 | 0.003026 |
| RPRM      | 2.913165 | 0.486733 | -2.58139 | 5.34E-07 | 4.34E-06 |
| MIR5192   | 0.044239 | 0.215022 | 2.281096 | 0.000581 | 0.001575 |
| AC007342  | 0.361909 | 1.176783 | 1.701148 | 4.55E-05 | 0.000179 |
| IGFBP1    | 0.043335 | 1.811591 | 5.385569 | 5.90E-06 | 3.22E-05 |
| RNA5SP12  | 0.253553 | 0.730308 | 1.526217 | 0.000981 | 0.002484 |
| AC021851  | 0.180288 | 0.51468  | 1.513375 | 1.30E-06 | 9.05E-06 |
| PLN       | 70.17941 | 12.80396 | -2.45446 | 5.58E-06 | 3.08E-05 |
| SNORD14   | 0.639912 | 2.854085 | 2.157083 | 2.37E-05 | 0.000103 |
| AP000753  | 0.099217 | 0.377543 | 1.927977 | 0.000112 | 0.000383 |
| AC091153  | 0.055822 | 0.230642 | 2.046756 | 4.37E-06 | 2.51E-05 |
| AP001052  | 0.522334 | 1.970049 | 1.915187 | 1.42E-07 | 1.48E-06 |
| RPSAP52   | 0.023199 | 0.252823 | 3.445993 | 1.05E-12 | 1.31E-09 |
| ST6GAL2   | 0.736186 | 0.259323 | -1.50532 | 0.023298 | 0.038364 |
| IGSF11    | 0.989894 | 0.205081 | -2.27108 | 1.76E-05 | 8.00E-05 |
| SOX21     | 13.35344 | 2.966468 | -2.17039 | 0.000168 | 0.000541 |
| AQP3      | 66.27134 | 15.35416 | -2.10976 | 0.010258 | 0.018863 |
| IGFBP6    | 62.05458 | 14.83475 | -2.06456 | 3.56E-08 | 4.87E-07 |
| CALHM3    | 0.031143 | 0.476372 | 3.935096 | 7.85E-05 | 0.000283 |
| AC025575  | 0.126633 | 1.220675 | 3.26896  | 7.94E-06 | 4.12E-05 |
| SGO2      | 0.738064 | 2.480964 | 1.749084 | 2.37E-10 | 1.05E-08 |
| ADAMTS1   | 0.416774 | 2.837983 | 2.76753  | 3.68E-12 | 1.44E-09 |
| NEGR1     | 4.256083 | 1.138391 | -1.90253 | 1.07E-05 | 5.27E-05 |
| TSPEAR-A  | 0.25783  | 1.124301 | 2.124534 | 1.30E-05 | 6.21E-05 |
| FERMT1    | 7.122869 | 25.50295 | 1.840134 | 1.92E-08 | 2.95E-07 |
| RHPN1     | 1.338257 | 4.581529 | 1.775474 | 2.24E-09 | 5.47E-08 |
| ANGPTL1   | 14.10343 | 2.774065 | -2.34597 | 1.59E-07 | 1.63E-06 |
| RNU6-12c  | 0.117747 | 0.333691 | 1.502822 | 0.00034  | 0.000992 |
| FOXJ1     | 0.656958 | 5.452907 | 3.053154 | 0.002312 | 0.005192 |
| PHBP19    | 0.411873 | 1.256941 | 1.609644 | 1.27E-06 | 8.87E-06 |
| LINC0173f | 0.19976  | 0.568568 | 1.509068 | 0.000157 | 0.00051  |
| AC073323  | 0.004929 | 0.219886 | 5.47922  | 6.24E-08 | 7.62E-07 |
| BAMBI     | 1.292561 | 14.29984 | 3.467695 | 2.34E-07 | 2.21E-06 |
| AP003086  | 0.081406 | 0.302016 | 1.891415 | 1.07E-06 | 7.75E-06 |
| LINC0112g | 0.270052 | 0.812503 | 1.589134 | 2.27E-08 | 3.38E-07 |
| AP001574  | 0.068661 | 0.250678 | 1.868277 | 0.001572 | 0.003727 |
| ARHGEF3f  | 0.337348 | 1.582836 | 2.230204 | 1.69E-09 | 4.45E-08 |
| RNY1P10   | 0.047524 | 0.308479 | 2.698459 | 8.44E-05 | 0.000301 |
| NAP1L4P1  | 0.172549 | 0.551381 | 1.676045 | 2.78E-07 | 2.54E-06 |
| DDIAS     | 0.539106 | 2.194159 | 2.025028 | 3.23E-10 | 1.30E-08 |
| RBM24     | 1.888361 | 0.593866 | -1.66892 | 0.00019  | 0.000602 |

|           |          |          |          |          |          |
|-----------|----------|----------|----------|----------|----------|
| COL10A1   | 0.801293 | 12.27075 | 3.93675  | 1.86E-12 | 1.40E-09 |
| IL17C     | 0.251174 | 0.944127 | 1.910293 | 0.002582 | 0.005719 |
| AC003965  | 0.374605 | 2.287455 | 2.610302 | 5.11E-07 | 4.19E-06 |
| MAGEA10   | 0.006487 | 1.028896 | 7.309313 | 0.024855 | 0.040578 |
| TNNC1     | 0.51391  | 3.135058 | 2.608905 | 9.74E-05 | 0.000339 |
| MIR4479   | 0.189045 | 0.966421 | 2.353925 | 1.09E-06 | 7.86E-06 |
| RCOR2     | 0.640539 | 3.045758 | 2.249443 | 1.84E-07 | 1.82E-06 |
| FAM72D    | 0.112025 | 0.540524 | 2.270541 | 8.29E-10 | 2.63E-08 |
| E2F7      | 0.38872  | 1.994159 | 2.358976 | 9.72E-11 | 6.00E-09 |
| KIAA1549I | 0.157122 | 0.611407 | 1.960245 | 0.001255 | 0.003072 |
| C4BPA     | 0.091134 | 3.227459 | 5.146261 | 6.79E-08 | 8.14E-07 |
| LYG2      | 0.130493 | 0.428028 | 1.713736 | 0.00011  | 0.000376 |
| BMPER     | 1.290751 | 0.329931 | -1.96797 | 9.09E-05 | 0.00032  |
| HSPB7     | 34.90933 | 10.58993 | -1.72092 | 0.000142 | 0.000471 |
| LINC0191I | 0.020998 | 0.368129 | 4.131855 | 4.97E-06 | 2.79E-05 |
| H19       | 6.093165 | 48.02937 | 2.978653 | 0.006674 | 0.013004 |
| MMP7      | 3.11939  | 53.68137 | 4.105085 | 1.18E-06 | 8.36E-06 |
| AC008395  | 0.100345 | 0.303333 | 1.595939 | 8.54E-05 | 0.000304 |
| HOXC-AS   | 0.068303 | 0.987551 | 3.85384  | 5.90E-11 | 4.49E-09 |
| AC135279  | 0.149138 | 0.48486  | 1.700921 | 2.73E-07 | 2.50E-06 |
| TRARG1    | 1.024964 | 0.292782 | -1.80768 | 3.70E-07 | 3.20E-06 |
| RNU6-1I4  | 0.063054 | 0.326092 | 2.370622 | 0.004164 | 0.008656 |
| SNORA71   | 0.465912 | 1.829601 | 1.9734   | 1.28E-09 | 3.59E-08 |
| PNCK      | 5.972558 | 1.023307 | -2.54511 | 1.39E-05 | 6.55E-05 |
| AC087163  | 0.094339 | 0.298647 | 1.662517 | 2.96E-07 | 2.68E-06 |
| SNORD37   | 0.096099 | 0.337992 | 1.814399 | 0.002563 | 0.005681 |
| LINC0187I | 0.137799 | 0.520396 | 1.917047 | 0.00107  | 0.002672 |
| AC104964  | 0.137668 | 0.438857 | 1.672557 | 0.000854 | 0.0022   |
| GRIN2D    | 2.228471 | 10.87087 | 2.28634  | 2.45E-09 | 5.85E-08 |
| PGM5      | 27.13256 | 5.56174  | -2.28642 | 3.06E-07 | 2.75E-06 |
| H2AFZP6   | 0.041934 | 0.219575 | 2.388523 | 8.29E-07 | 6.25E-06 |
| TTC36     | 2.345762 | 0.559946 | -2.0667  | 2.37E-05 | 0.000103 |
| NUTF2P6   | 0.120596 | 0.345483 | 1.518426 | 4.15E-05 | 0.000166 |
| AC139792  | 0.126078 | 0.364891 | 1.533149 | 0.003066 | 0.006634 |
| AC009093  | 0.074153 | 0.211871 | 1.514619 | 1.44E-07 | 1.49E-06 |
| AL391988  | 0.555726 | 1.703881 | 1.616378 | 1.35E-07 | 1.42E-06 |
| AC093583  | 0.601158 | 0.197716 | -1.60431 | 0.025724 | 0.041812 |
| RNU6ATA   | 0.161435 | 0.488055 | 1.59609  | 5.80E-05 | 0.000219 |
| ULBP2     | 0.80537  | 2.388975 | 1.568669 | 3.78E-06 | 2.21E-05 |
| PODNL1    | 0.681621 | 1.98055  | 1.53886  | 9.35E-07 | 6.92E-06 |
| EPHX4     | 0.29961  | 1.205947 | 2.009008 | 8.91E-05 | 0.000315 |
| PGA3      | 364.7984 | 28.01709 | -3.70272 | 4.48E-05 | 0.000177 |
| TMEM52B   | 0.094732 | 0.355438 | 1.907678 | 1.30E-08 | 2.18E-07 |
| CTNNA3    | 1.953989 | 0.31788  | -2.61987 | 0.006141 | 0.012113 |
| HMMR      | 1.72481  | 6.692583 | 1.956126 | 4.25E-10 | 1.60E-08 |
